# Supplementary material for: Myocarditis and Pericarditis following COVID-19 Vaccination: Rapid Systematic Review of Incidence, Risk Factors, and Clinical Course
Source: bioRxiv or medRxiv preprint supplement (doi:10.1101/2021.11.19.21266605), 2021-11-21
Supplement: Supplementary file [file media-1.pdf]

# Myocarditis and Pericarditis following COVID-19 Vaccination: Rapid Systematic Review of Incidence, Risk Factors, and Clinical Course

Authors: Jennifer Pillay, MSc, Liza Bialy, MSc, Lindsay Gaudet, MSc, Aireen Wingert, MSc, Andrew S. Mackie, MD, SM, FRCPC, D. Ian Paterson, MD, FRCPC, Lisa Hartling, PhD

## Appendices

### Appendix 1. Search strategies

Ovid Multifile

Database: Ovid MEDLINE(R) and Epub Ahead of Print, In-Process, In-Data-Review & Other Non-Indexed Citations and Daily <1946 to October 05, 2021>, Embase <1974 to 2021 October 05>  
Search Strategy:

- 
- 1 COVID-19 Vaccines/ [COVID VACCINES PT 1] (11038)
  - 2 COVID-19/ (152175)
  - 3 SARS-CoV-2/ (101136)
  - 4 Coronavirus/ (13257)
  - 5 Betacoronavirus/ (40795)
  - 6 Coronavirus Infections/ (56640)
  - 7 (COVID-19 or COVID19).tw,kf. (324030)
  - 8 ((coronavirus\* or corona virus\*) and (hubei or wuhan or beijing or shanghai)).tw,kf. (10884)
  - 9 (wuhan adj5 virus\*).tw,kf. (569)
  - 10 (2019-nCoV or 19nCoV or 2019nCoV).tw,kf. (3694)
  - 11 (nCoV or n-CoV or "CoV 2" or CoV2).tw,kf. (124619)
  - 12 (SARS-CoV-2 or SARS-CoV2 or SARSCoV-2 or SARSCoV2 or SARS2 or SARS-2 or severe acute respiratory syndrome coronavirus 2).tw,kf. (126706)
  - 13 (2019-novel CoV or Sars-coronavirus2 or Sars-coronavirus-2 or SARS-like coronavirus\* or ((novel or new or nouveau) adj2 (CoV or nCoV or covid or coronavirus\* or corona virus or Pandemi\*2)) or (coronavirus\* and pneumonia)).tw,kf. (41877)
  - 14 (novel coronavirus\* or novel corona virus\* or novel CoV).tw,kf. (20703)
  - 15 ((coronavirus\* or corona virus\*) adj2 "2019").tw,kf. (71612)
  - 16 ((coronavirus\* or corona virus\*) adj2 "19").tw,kf. (11500)
  - 17 ("coronavirus 2" or "corona virus 2").tw,kf. (38199)
  - 18 (OC43 or NL63 or 229E or HKU1 or HCoV\* or Sars-coronavirus\*).tw,kf. (8144)
  - 19 COVID-19.rx,px,ox. or severe acute respiratory syndrome coronavirus 2.os. (9120)
  - 20 (coronavirus\* or corona virus\*).ti. (48015)
  - 21 COVID.ti. (254131)
  - 22 ("B.1.1.7" or "B.1.351" or "B.1.617" or "B.1.427" or "B.1.429").tw,kf,rx,px,ox. (1406)
  - 23 ("P.1" and (Brazil\* or variant?)).tw,kf,rx,px,ox. (3731)
  - 24 (((alpha or beta or delta or eta or gamma or iota or kappa or lambda) adj3 variant?) and (coronavirus\* or corona virus\* or covid\*)).tw,kf. (459)
  - 25 or/2-24 [COVID-19] (397323)
  - 26 exp Vaccination/ (278048)
  - 27 ((COVID or COVID-19 or COVID19) adj5 (immunis\* or immuniz\* or inoculat\* or vaccin\*)).tw,kf. (15689)
  - 28 ((coronavirus\* or corona virus\*) adj5 (immunis\* or immuniz\* or inoculat\* or vaccin\*)).tw,kf. (3065)

29 ((2019-nCoV or nCoV or n-CoV or SARS-CoV-2 or SARS-CoV2 or SARSCoV-2 or SARSCoV2 or SARS2 or SARS-2 or OC43 or NL63 or 229E or HKU1 or HCoV\*) adj5 (immunis\* or immuniz\* or inoculat\* or vaccin\*).tw,kf. (8201)

30 (BNT162 or BNT162-01 or BNT162a1 or BNT162b1 or BNT162b2 or BNT162c2 or N38TVC63NU).tw,kf. (1584)

31 (AZD1222 or ChAdOx1 or Covishield\$2 or B5S3K2V0G8).tw,kf. (967)

32 (mRNA-1273 or EPK39PL4R4).tw,kf. (596)

33 (mRNA adj5 (immunis\* or immuniz\* or inoculat\* or vaccin\*).tw,kf. (4901)

34 (messenger RNA adj5 (immunis\* or immuniz\* or inoculat\* or vaccin\*).tw,kf. (462)

35 LV-SMENP-DC.tw,kf. (6)

36 (Ad5-nCoV or hAdOx1 nCoV-19).tw,kf. (39)

37 ("Ad26.COVS.2" or Ad26COVS1 or JNJ 78436735 or JNJ-78436735 or JT2NS6183B).tw,kf. (195)

38 (Janssen adj5 (immunis\* or immuniz\* or inoculat\* or vaccin\*).tw,kf. (142)

39 CX-024414.tw,kf. (2)

40 (Moderna adj5 (immunis\* or immuniz\* or inoculat\* or vaccin\*).tw,kf. (470)

41 Spikevax\$2.tw,kf. (11)

42 ((Pfizer or Pfizer-BioNTech) adj5 (immunis\* or immuniz\* or inoculat\* or vaccin\*).tw,kf. (1249)

43 (Comirnaty\$2 or Tozinameran\$2).tw,kf. (202)

44 ((AstraZeneca or AZ or Oxford) adj5 (immunis\* or immuniz\* or inoculat\* or vaccin\*).tw,kf. (731)

45 Vaxzevria\$2.tw,kf. (119)

46 or/26-45 [VACCINES] (295717)

47 25 and 46 [COVID-VACCINES PT 2] (26788)

48 1 or 47 [COVID-VACCINES PTS 1-2] (28932)

49 COVID-19 Vaccines/ae [adverse events] (933)

50 Viral Vaccines/ae [adverse events] (2911)

51 Adverse Drug Reaction Reporting Systems/ (10804)

52 ((immunis\* or immuniz\* or inoculat\* or vaccin\*) adj10 (adverse\* or ADE or ADEs or ADR or ADRs or complication\* or harm\* or safe or safety or side effect? or undesirable effect? or undesirable consequence? or undesirable outcome? or unintended effect? or unintended consequence? or unintended outcome?)).tw,kf. (76675)

53 ((post-vaccin\* or post-immuni#ation\* or post-innoculat\* or after vaccin\* or after immuni#ation\* or after innoculat\* or (following adj3 vaccin\*) or (following adj3 immuni#ation\*) or (following adj3 innoculat\*)) adj10 (adverse\* or ADE or ADEs or ADR or ADRs or complication\* or harm\* or safe or safety or side effect? or undesirable effect? or undesirable consequence? or undesirable outcome? or unintended effect? or unintended consequence? or unintended outcome?)).tw,kf. (6413)

54 ((post-vaccin\* or post-immuni#ation\* or post-innoculat\* or after vaccin\* or after immuni#ation\* or after innoculat\* or (following adj3 vaccin\*) or (following adj3 immuni#ation\*) or (following adj3 innoculat\*)) adj10 (complication? or consequenc\* or effect? or event? or harm\* or outcome?)).tw,kf. (7716)

55 (vaccine-associated or vaccine-induced or vaccine-related).tw,kf. (20509)

56 (immuni#ation-associated or immuni#ation-induced or immuni#ation-related).tw,kf. (1855)

57 ((data or vaccin\*) adj3 (monitor\* or surveillance\*).tw,kf. (73396)

58 Pharmacovigilance/ (5248)

59 (pharmacovigilan\* or pharmaco-vigilan\*).tw,kf. (18894)

60 (Canada Vigilance or Eudravigilance\* or FAERS or VAERS).tw,kf. (2780)

61 Product Surveillance, Postmarketing/ (19287)

62 ((postmarket\* or post-market\*) adj3 surveillance\*).tw,kf. (9589)

63 "Clinical Trial, Phase IV".pt. (2193)

64 ((Phase 4 or Phase IV) adj3 (evaluation? or study or studies or trial?)).tw,kf. (4910)

65 Cardiomyopathies/ (54974)

66 (cardiomyopath\* or cardio-myopath\* or myocardiopath\* or myo-cardiopath\*).tw,kf. (209222)

67 Myocarditis/ (42633)  
68 myocarditis.tw,kf. (41845)  
69 ((myocard\* or myo-card) adj3 inflam\*).tw,kf. (10214)  
70 carditis.tw,kf. (4148)  
71 exp Pericarditis/ (31618)  
72 pericarditis.tw,kf. (27519)  
73 ((pericard\* or peri-card\*) adj3 inflam\*).tw,kf. (1118)  
74 epicarditis.tw,kf. (249)  
75 ((epicard\* or epi-card\*) adj3 inflam\*).tw,kf. (260)  
76 (myopericarditis or myo-pericarditis).tw,kf. (1763)  
77 ((myopericard\* or myo-pericard\*) adj inflam\*).tw,kf. (13)  
78 (pleuropericarditis or pleuro-pericarditis).tw,kf. (412)  
79 ((pleuropericard\* or pleuropericard\*) adj3 inflam\*).tw,kf. (12)  
80 or/49-79 [AEs, MYOCARDITIS, PERICARDITIS] (535683)  
81 48 and 80 [COVID-VACCINES - AEs, MYOCARDITIS, PERICARDITIS] (6406)  
82 exp Animals/ not Humans/ (16924647)  
83 81 not 82 [ANIMAL-ONLY REMOVED] (4653)  
84 (comment or editorial or news or newspaper article or (letter not (letter and randomized controlled trial))).pt. (4104337)  
85 83 not 84 [OPINION PIECES REMOVED] (4141)  
86 limit 85 to yr="2020-current" (4046)  
87 (202010\* or 202011\* or 202012\* or 2021\*).dt. (1600708)  
88 86 and 87 [RECORDS SINCE 1 OCT 2020] (2589)  
89 88 use ppez[MEDLINE RECORDS] (2589)  
90 SARS-CoV-2 vaccine/ [COVID VACCINES - PT 1] (11038)  
91 coronavirus disease 2019/ (261337)  
92 severe acute respiratory syndrome coronavirus 2/ (130655)  
93 Coronavirinae/ (5218)  
94 Betacoronavirus/ (40795)  
95 coronavirus infection/ (57662)  
96 (COVID-19 or COVID19).tw,kw,kf. (324030)  
97 ((coronavirus\* or corona virus\*) and (hubei or wuhan or beijing or shanghai)).tw,kw,kf. (10884)  
98 (wuhan adj5 virus\*).tw,kw,kf. (584)  
99 (2019-nCoV or 19nCoV or 2019nCoV).tw,kw,kf. (3694)  
100 (nCoV or n-CoV or "CoV 2" or CoV2).tw,kw,kf. (124619)  
101 (SARS-CoV-2 or SARS-CoV2 or SARSCoV-2 or SARSCoV2 or SARS2 or SARS-2 or severe acute respiratory syndrome coronavirus 2).tw,kw,kf. (126706)  
102 (2019-novel CoV or Sars-coronavirus2 or Sars-coronavirus-2 or SARS-like coronavirus\* or ((novel or new or nouveau) adj2 (CoV or nCoV or covid or coronavirus\* or corona virus or Pandemi\*2)) or (coronavirus\* and pneumonia)).tw,kw,kf. (41884)  
103 (novel coronavirus\* or novel corona virus\* or novel CoV).tw,kw,kf. (20703)  
104 ((coronavirus\* or corona virus\*) adj2 "2019").tw,kw,kf. (71614)  
105 ((coronavirus\* or corona virus\*) adj2 "19").tw,kw,kf. (11502)  
106 ("coronavirus 2" or "corona virus 2").tw,kw,kf. (38199)  
107 (OC43 or NL63 or 229E or HKU1 or HCoV\* or Sars-coronavirus\*).tw,kw,kf. (8144)  
108 (coronavirus\* or corona virus\*).ti. (48015)  
109 COVID.ti. (254131)  
110 ("B.1.1.7" or "B.1.351" or "B.1.617" or "B.1.427" or "B.1.429").tw,kw,kf. (1406)  
111 ("P.1" and (Brazil\* or variant?)).tw,kw,kf. (3704)  
112 (((alpha or beta or delta or eta or gamma or iota or kappa or lambda) adj3 variant?) and (coronavirus\* or corona virus\* or covid\*)).tw,kw,kf. (461)

113 or/91-112 [COVID-19] (404957)  
114 vaccination/ (246289)  
115 ((COVID or COVID-19 or COVID19) adj5 (immunis\* or immuniz\* or inoculat\* or vaccin\*)).tw,kw,kf. (17544)  
116 ((coronavirus\* or corona virus\*) adj5 (immunis\* or immuniz\* or inoculat\* or vaccin\*)).tw,kw,kf. (3913)  
117 ((2019-nCoV or nCoV or n-CoV or SARS-CoV-2 or SARS-CoV2 or SARSCoV-2 or SARSCoV2 or SARS2 or SARS-2 or OC43 or NL63 or 229E or HKU1 or HCoV\*) adj5 (immunis\* or immuniz\* or inoculat\* or vaccin\*)).tw,kw,kf. (9069)  
118 (BNT162 or BNT162-01 or BNT162a1 or BNT162b1 or BNT162b2 or BNT162c2 or N38TVC63NU).tw,kw,kf. (1584)  
119 (AZD1222 or ChAdOx1 or Covishield\$2 or B5S3K2V0G8).tw,kw,kf. (967)  
120 (mRNA-1273 or EPK39PL4R4).tw,kw,kf. (596)  
121 (mRNA adj5 (immunis\* or immuniz\* or inoculat\* or vaccin\*)).tw,kw,kf. (4944)  
122 (messenger RNA adj5 (immunis\* or immuniz\* or inoculat\* or vaccin\*)).tw,kw,kf. (475)  
123 LV-SMENP-DC.tw,kw,kf. (6)  
124 (Ad5-nCoV or hAdOx1 nCoV-19).tw,kw,kf. (39)  
125 ("Ad26.COV2.S" or Ad26COVS1 or JNJ 78436735 or JNJ-78436735 or JT2NS6183B).tw,kw,kf. (195)  
126 (Janssen adj5 (immunis\* or immuniz\* or inoculat\* or vaccin\*)).tw,kf. (142)  
127 CX-024414.tw,kw,kf. (2)  
128 (Moderna adj5 (immunis\* or immuniz\* or inoculat\* or vaccin\*)).tw,kw,kf. (483)  
129 Spikevax\$2.tw,kw,kf. (11)  
130 ((Pfizer or Pfizer-BioNTech) adj5 (immunis\* or immuniz\* or inoculat\* or vaccin\*)).tw,kf,kw. (1264)  
131 (Comirnaty\$2 or Tozinameran\$2).tw,kw,kf. (202)  
132 ((AstraZeneca or AZ or Oxford) adj5 (immunis\* or immuniz\* or inoculat\* or vaccin\*)).tw,kw,kf. (733)  
133 Vaxzevria\$2.tw,kw,kf. (119)  
134 or/114-133 [VACCINES] (265426)  
135 113 and 134 [COVID VACCINES - PT 2] (27369)  
136 90 or 135 [COVID VACCINES - PTS 1 & 2] (29374)  
137 virus vaccine/ae [adverse drug event] (999)  
138 exp severe acute respiratory syndrome vaccine/ae [adverse drug event] (470)  
139 ((immunis\* or immuniz\* or inoculat\* or vaccin\*) adj10 (adverse\* or ADE or ADEs or ADR or ADRs or complication\* or harm\* or safe or safety or side effect? or undesirable effect? or undesirable consequence? or undesirable outcome? or unintended effect? or unintended consequence? or unintended outcome?)).tw,kw,kf. (76966)  
140 ((post-vaccin\* or post-immuni#ation\* or post-innoculat\* or after vaccin\* or after immuni#ation\* or after innoculat\* or (following adj3 vaccin\*) or (following adj3 immuni#ation\*) or (following adj3 innoculat\*)) adj10 (adverse\* or ADE or ADEs or ADR or ADRs or complication\* or harm\* or safe or safety or side effect? or undesirable effect? or undesirable consequence? or undesirable outcome? or unintended effect? or unintended consequence? or unintended outcome?)).tw,kw,kf. (6417)  
141 ((post-vaccin\* or post-immuni#ation\* or post-innoculat\* or after vaccin\* or after immuni#ation\* or after innoculat\* or (following adj3 vaccin\*) or (following adj3 immuni#ation\*) or (following adj3 innoculat\*)) adj10 (complication? or consequenc\* or effect? or event? or harm\* or outcome?)).tw,kw,kf. (7718)  
142 (vaccine-associated or vaccine-induced or vaccine-related).tw,kw,kf. (20509)  
143 (immuni#ation-associated or immuni#ation-induced or immuni#ation-related).tw,kw,kf. (1855)  
144 exp pharmacovigilance/ (5254)  
145 (pharmacovigilan\* or pharmaco-vigilan\*).tw,kw,kf. (18894)  
146 (Canada Vigilance or Eudravigilance\* or FAERS or VAERS).tw,kw,kf. (2780)

147 exp postmarketing surveillance/ (37209)  
148 ((postmarket\* or post-market\*) adj3 surveillance\*).tw,kw,kf. (9603)  
149 phase 4 clinical trial/ (4491)  
150 ((Phase 4 or Phase IV) adj3 (evaluation? or study or studies or trial?)).tw,kw,kf. (4910)  
151 cardiomyopathy/ (90014)  
152 (cardiomyopath\* or cardio-myopath\* or myocardiopath\* or myo-cardiopath\*).tw,kw,kf. (209222)  
153 exp myocarditis/ (45666)  
154 myocarditis.tw,kw,kf. (41845)  
155 ((myocard\* or myo-card) adj3 inflam\*).tw,kw,kf. (12899)  
156 carditis.tw,kw,kf. (4148)  
157 exp pericarditis/ (31618)  
158 pericarditis.tw,kw,kf. (27519)  
159 ((pericard\* or peri-card\*) adj3 inflam\*).tw,kw,kf. (1222)  
160 epicarditis.tw,kw,kf. (249)  
161 ((epicard\* or epi-card\*) adj3 inflam\*).tw,kw,kf. (391)  
162 (myopericarditis or myo-pericarditis).tw,kw,kf. (1763)  
163 ((myopericard\* or myo-pericard\*) adj inflam\*).tw,kw,kf. (25)  
164 (pleuropericarditis or pleuro-pericarditis).tw,kw,kf. (412)  
165 ((pleuropericard\* or pleuropericard\*) adj3 inflam\*).tw,kw,kf. (13)  
166 or/137-165 [MYOCARDITIS, PERICARDITIS] (483566)  
167 136 and 166 [COVID-VACCINES - MYOCARDITIS, PERICARDITIS] (6014)  
168 exp animal/ or exp animal experimentation/ or exp animal model/ or exp animal experiment/ or  
nonhuman/ or exp vertebrate/ (54214081)  
169 exp human/ or exp human experimentation/ or exp human experiment/ (42550990)  
170 168 not 169 (11664830)  
171 167 not 170 [ANIMAL-ONLY REMOVED] (5784)  
172 editorial.pt. (1287357)  
173 letter.pt. not (letter.pt. and randomized controlled trial/) (2336030)  
174 171 not (172 or 173) [OPINION PIECES REMOVED] (5259)  
175 limit 174 to yr="2020-current" (5170)  
176 (202010\* or 202011\* or 202012\* or 2021\*).dc. (2457999)  
177 175 and 176 [RECORDS PUBLISHED/ADDED SINCE OCT 2020] (2500)  
178 177 use oemzd [EMBASE RECORDS] (2500)  
179 89 or 178 [BOTH DATABASES] (5089)  
180 remove duplicates from 179 (3235)[TOTAL UNIQUE RECORDS]  
181 180 use ppez [MEDLINE UNIQUE RECORDS] (2530)  
182 180 use oemzd [EMBASE UNIQUE RECORDS] (705)

\*\*\*\*\*

## Cochrane Library

|   |   |     |                                                                                                                                                                                                                                                                                            |        |      |
|---|---|-----|--------------------------------------------------------------------------------------------------------------------------------------------------------------------------------------------------------------------------------------------------------------------------------------------|--------|------|
| - | + | #1  | [mh "COVID-19 Vaccines"]                                                                                                                                                                                                                                                                   | Limits | 55   |
| - | + | #2  | [mh "COVID-19"]                                                                                                                                                                                                                                                                            | Limits | 657  |
| - | + | #3  | [mh "SARS-CoV-2"]                                                                                                                                                                                                                                                                          | Limits | 479  |
| - | + | #4  | [mh *Coronavirus]                                                                                                                                                                                                                                                                          | Limits | 4    |
| - | + | #5  | [mh *Betacoronavirus]                                                                                                                                                                                                                                                                      | Limits | 127  |
| - | + | #6  | [mh *Coronavirus Infections]                                                                                                                                                                                                                                                               | Limits | 657  |
| - | + | #7  | ("COVID-19" or COVID19):ti,ab,kw                                                                                                                                                                                                                                                           | Limits | 7299 |
| - | + | #8  | ((coronavirus* or corona virus*) and (hubei or wuhan or beijing or shanghai)):ti,ab,kw                                                                                                                                                                                                     | Limits | 219  |
| - | + | #9  | (wuhan NEAR/5 virus):ti,ab,kw                                                                                                                                                                                                                                                              | Limits | 9    |
| - | + | #10 | ("2019-nCoV" or 19nCoV or 2019nCoV):ti,ab,kw                                                                                                                                                                                                                                               | Limits | 10   |
| - | + | #11 | (nCoV or n-CoV or "CoV 2" or CoV2):ti,ab,kw                                                                                                                                                                                                                                                | Limits | 690  |
| - | + | #12 | ("SARS-CoV-2" or "SARS-CoV2" or "SARSCoV-2" or SARSCoV2 or SARS2 or "SARS-2" or "severe acute respiratory syndrome coronavirus 2"):ti,ab,kw                                                                                                                                                | Limits | 3039 |
| - | + | #13 | ("2019-novel CoV" or "Sars-coronavirus2" or "Sars-coronavirus-2" or "SARS-like coronavirus" or "SARS-like coronaviruses" or ((novel or new or <u>novel</u> ) NEAR/2 (CoV or nCoV or covid or coronavirus* or "corona virus" or <u>Pandemi</u> 2)) or (coronavirus* and pneumonia):ti,ab,kw | Limits | 1367 |
| - | + | #14 | ("novel coronavirus" or "novel coronaviruses" or "novel corona virus" or "novel corona viruses" or "novel CoV"):ti,ab,kw                                                                                                                                                                   | Limits | 478  |
| - | + | #15 | ((coronavirus* or "corona virus" or "corona viruses") NEAR/2 "2019"):ti,ab,kw                                                                                                                                                                                                              | Limits | 2503 |
| - | + | #16 | ((coronavirus* or "corona virus" or "corona viruses") NEAR/2 "19"):ti,ab,kw                                                                                                                                                                                                                | Limits | 299  |
| - | + | #17 | ("coronavirus 2" or "corona virus 2"):ti,ab,kw                                                                                                                                                                                                                                             | Limits | 765  |
| - | + | #18 | (OC43 or NL63 or 229E or HKU1 or HCoV* or (Sars NEXT coronavirus)):ti,ab,kw                                                                                                                                                                                                                | Limits | 84   |
| - | + | #19 | (coronavirus* or "corona virus" or "corona viruses"):ti                                                                                                                                                                                                                                    | Limits | 736  |
| - | + | #20 | COVID:ti                                                                                                                                                                                                                                                                                   | Limits | 5641 |

|   |   |     |                                                                                                                                                                                                                                                                                                                                                                                                                                                                                                                                                                                                                                                                                                                                                                                                                                 |        |       |
|---|---|-----|---------------------------------------------------------------------------------------------------------------------------------------------------------------------------------------------------------------------------------------------------------------------------------------------------------------------------------------------------------------------------------------------------------------------------------------------------------------------------------------------------------------------------------------------------------------------------------------------------------------------------------------------------------------------------------------------------------------------------------------------------------------------------------------------------------------------------------|--------|-------|
| - | + | #21 | ("B.1.1.7" or "B.1.351" or "B.1.617" or "B.1.427" or "B.1.429");ti,ab,kw                                                                                                                                                                                                                                                                                                                                                                                                                                                                                                                                                                                                                                                                                                                                                        | Limits | 16    |
| - | + | #22 | ("P.1" and (Brazil" or variant"));ti,ab,kw                                                                                                                                                                                                                                                                                                                                                                                                                                                                                                                                                                                                                                                                                                                                                                                      | Limits | 175   |
| - | + | #23 | ((alpha or beta or delta or eta or gamma or iota or kappa or lambda) NEAR/3 variant*) and (coronavirus* or corona virus* or covid*);ti,ab,kw                                                                                                                                                                                                                                                                                                                                                                                                                                                                                                                                                                                                                                                                                    | Limits | 7     |
| - | + | #24 | {or #2-#23}                                                                                                                                                                                                                                                                                                                                                                                                                                                                                                                                                                                                                                                                                                                                                                                                                     | Limits | 7898  |
| - | + | #25 | [mh Vaccination]                                                                                                                                                                                                                                                                                                                                                                                                                                                                                                                                                                                                                                                                                                                                                                                                                | Limits | 2680  |
| - | + | #26 | ((COVID or "COVID-19" or COVID19) NEAR/5 (immunis* or immuniz* or inoculat* or vaccin*));ti,ab,kw                                                                                                                                                                                                                                                                                                                                                                                                                                                                                                                                                                                                                                                                                                                               | Limits | 493   |
| - | + | #27 | ((coronavirus* or "corona virus" or "corona viruses") NEAR/5 (immunis* or immuniz* or inoculat* or vaccin*));ti,ab,kw                                                                                                                                                                                                                                                                                                                                                                                                                                                                                                                                                                                                                                                                                                           | Limits | 100   |
| - | + | #28 | ((("2019-nCoV" or nCoV or nCoV or "SARS-CoV-2" or "SARS-CoV2" or "SARSCoV-2" or SARSCoV2 or SARS2 or "SARS-2" or OC43 or NL63 or 229E or HKU1 or hCoV) NEAR/5 (immunis* or immuniz* or inoculat* or vaccin*));ti,ab,kw                                                                                                                                                                                                                                                                                                                                                                                                                                                                                                                                                                                                          | Limits | 221   |
| - | + | #29 | (BNT162 or "BNT162-01" or BNT162a1 or BNT162b1 or BNT162b2 or BNT162c2 or N38TVC63NU);ti,ab,kw                                                                                                                                                                                                                                                                                                                                                                                                                                                                                                                                                                                                                                                                                                                                  | Limits | 38    |
| - | + | #30 | (AZD1222 or ChAdOx1 or Covshield* or B5S3K2V0G8);ti,ab,kw                                                                                                                                                                                                                                                                                                                                                                                                                                                                                                                                                                                                                                                                                                                                                                       | Limits | 63    |
| - | + | #31 | ("mRNA-1273" or EPK39PL4R4);ti,ab,kw                                                                                                                                                                                                                                                                                                                                                                                                                                                                                                                                                                                                                                                                                                                                                                                            | Limits | 24    |
| - | + | #32 | (mRNA NEAR/5 (immunis* or immuniz* or inoculat* or vaccin*));ti,ab,kw                                                                                                                                                                                                                                                                                                                                                                                                                                                                                                                                                                                                                                                                                                                                                           | Limits | 100   |
| - | + | #33 | ("messenger RNA" NEAR/5 (immunis* or immuniz* or inoculat* or vaccin*));ti,ab,kw                                                                                                                                                                                                                                                                                                                                                                                                                                                                                                                                                                                                                                                                                                                                                | Limits | 24    |
| - | + | #34 | "LV-SMENP-DC";ti,ab,kw                                                                                                                                                                                                                                                                                                                                                                                                                                                                                                                                                                                                                                                                                                                                                                                                          | Limits | 0     |
| - | + | #35 | ("Ad5-nCoV" or "hAdOx1 nCoV-19");ti,ab,kw                                                                                                                                                                                                                                                                                                                                                                                                                                                                                                                                                                                                                                                                                                                                                                                       | Limits | 0     |
| - | + | #36 | ("Ad26.COV2.S" or Ad26COVS1 or "JNJ 78436735" or "JNJ-78436735" or JT2NS6183B);ti,ab,kw                                                                                                                                                                                                                                                                                                                                                                                                                                                                                                                                                                                                                                                                                                                                         | Limits | 22    |
| - | + | #37 | (Janssen NEAR/5 (immunis* or immuniz* or inoculat* or vaccin*));ti,ab,kw                                                                                                                                                                                                                                                                                                                                                                                                                                                                                                                                                                                                                                                                                                                                                        | Limits | 18    |
| - | + | #38 | "CX-024414";ti,ab,kw                                                                                                                                                                                                                                                                                                                                                                                                                                                                                                                                                                                                                                                                                                                                                                                                            | Limits | 2     |
| - | + | #39 | (Moderna NEAR/5 (immunis* or immuniz* or inoculat* or vaccin*));ti,ab,kw                                                                                                                                                                                                                                                                                                                                                                                                                                                                                                                                                                                                                                                                                                                                                        | Limits | 20    |
| - | + | #40 | Spikevax*;ti,ab,kw                                                                                                                                                                                                                                                                                                                                                                                                                                                                                                                                                                                                                                                                                                                                                                                                              | Limits | 0     |
| - | + | #41 | ((Pfizer or "Pfizer-BioNTech") NEAR/5 (immunis* or immuniz* or inoculat* or vaccin*));ti,ab,kw                                                                                                                                                                                                                                                                                                                                                                                                                                                                                                                                                                                                                                                                                                                                  | Limits | 47    |
| - | + | #42 | (Comirnaty* or Tozinameran*);ti,ab,kw                                                                                                                                                                                                                                                                                                                                                                                                                                                                                                                                                                                                                                                                                                                                                                                           | Limits | 10    |
| - | + | #43 | ((AstraZeneca or AZ or Oxford) NEAR/5 (immunis* or immuniz* or inoculat* or vaccin*));ti,ab,kw                                                                                                                                                                                                                                                                                                                                                                                                                                                                                                                                                                                                                                                                                                                                  | Limits | 34    |
| - | + | #44 | Vaxzevina*;ti,ab,kw                                                                                                                                                                                                                                                                                                                                                                                                                                                                                                                                                                                                                                                                                                                                                                                                             | Limits | 6     |
| - | + | #45 | {or #25-#44}                                                                                                                                                                                                                                                                                                                                                                                                                                                                                                                                                                                                                                                                                                                                                                                                                    | Limits | 3419  |
| - | + | #46 | #24 AND #45                                                                                                                                                                                                                                                                                                                                                                                                                                                                                                                                                                                                                                                                                                                                                                                                                     | Limits | 638   |
| - | + | #47 | #1 OR #46                                                                                                                                                                                                                                                                                                                                                                                                                                                                                                                                                                                                                                                                                                                                                                                                                       | Limits | 638   |
| - | + | #48 | [mh "COVID-19 Vaccines"/AE]                                                                                                                                                                                                                                                                                                                                                                                                                                                                                                                                                                                                                                                                                                                                                                                                     | Limits | 30    |
| - | + | #49 | [mh "Viral Vaccines"/AE]                                                                                                                                                                                                                                                                                                                                                                                                                                                                                                                                                                                                                                                                                                                                                                                                        | Limits | 221   |
| - | + | #50 | [mh "Adverse Drug Reaction Reporting Systems"]                                                                                                                                                                                                                                                                                                                                                                                                                                                                                                                                                                                                                                                                                                                                                                                  | Limits | 90    |
| - | + | #51 | ((immunis* or immuniz* or inoculat* or vaccin*) NEAR/10 (adverse* or ADE or ADEs or ADR or ADRs or complication* or harm* or safe or safety or "side effect" or "side effects" or "undesirable effect" or "undesirable effects" or "undesirable consequence" or "undesirable consequences" or "undesirable outcome" or "undesirable outcomes" or "unintended effect" or "unintended effects" or "unintended consequence" or "unintended consequences" or "unintended outcome" or "unintended outcome's"));ti,ab,kw                                                                                                                                                                                                                                                                                                              | Limits | 12385 |
| - | + | #52 | ((post NEXT vaccin*) or (post NEXT immunisation*) or (post NEXT immunization*) or (post NEXT inoculat*) or (after NEXT vaccin*) or (after NEXT immunisation*) or (after NEXT immunization*) or (after NEXT inoculat*) or (following NEAR/3 vaccin*) or (following NEAR/3 immunisation*) or (following NEAR/3 immunization*) or (following NEAR/3 inoculat*)) NEAR/10 (adverse* or ADE or ADEs or ADR or ADRs or complication* or harm* or safe or safety or "side effect" or "side effects" or "undesirable effect" or "undesirable effects" or "undesirable consequence" or "undesirable consequences" or "undesirable outcome" or "undesirable outcomes" or "unintended effect" or "unintended effects" or "unintended consequence" or "unintended consequences" or "unintended outcome" or "unintended outcome's"));ti,ab,kw | Limits | 1493  |
| - | + | #53 | ((post NEXT vaccin*) or (post NEXT immunisation*) or (post NEXT immunization*) or (post NEXT inoculat*) or (after NEXT vaccin*) or (after NEXT immunisation*) or (after NEXT immunization*) or (after NEXT inoculat*) or (following NEAR/3 vaccin*) or (following NEAR/3 immunisation*) or (following NEAR/3 immunization*) or (following NEAR/3 inoculat*)) NEAR/10 (complication* or consequenc* or effect or effects or event or events or harm* or outcome*);ti,ab,kw                                                                                                                                                                                                                                                                                                                                                       | Limits | 1214  |
| - | + | #54 | ("vaccine-associated" or "vaccine-induced" or "vaccine-related");ti,ab,kw                                                                                                                                                                                                                                                                                                                                                                                                                                                                                                                                                                                                                                                                                                                                                       | Limits | 1451  |
| - | + | #55 | ("immunisation-associated" or "immunisation-induced" or "immunisation-related" or "immunization-associated" or "immunization-induced" or "immunization-related");ti,ab,kw                                                                                                                                                                                                                                                                                                                                                                                                                                                                                                                                                                                                                                                       | Limits | 38    |
| - | + | #56 | ((data or vaccin*) NEAR/3 (monitor* or surveillance*));ti,ab,kw                                                                                                                                                                                                                                                                                                                                                                                                                                                                                                                                                                                                                                                                                                                                                                 | Limits | 4798  |
| - | + | #57 | [mh Pharmacovigilance]                                                                                                                                                                                                                                                                                                                                                                                                                                                                                                                                                                                                                                                                                                                                                                                                          | Limits | 18    |

|   |   |     |                                                                                                                                                                                                                                        |        |       |
|---|---|-----|----------------------------------------------------------------------------------------------------------------------------------------------------------------------------------------------------------------------------------------|--------|-------|
| - | + | #58 | ( <a href="#">pharmacovigilant</a> * or ( <a href="#">pharmaco</a> <a href="#">NEXT</a> <a href="#">vigilant</a> ")):ti,ab,kw                                                                                                          | Limits | 318   |
| - | + | #59 | ("Canada Vigilance" or <a href="#">Eudravigilance</a> * or <a href="#">FAERS</a> or <a href="#">VAERS</a> ):ti,ab,kw                                                                                                                   | Limits | 19    |
| - | + | #60 | [ <a href="#">mh</a> " <a href="#">Product Surveillance</a> , <a href="#">Postmarketing</a> "]                                                                                                                                         | Limits | 100   |
| - | + | #61 | (( <a href="#">postmarket</a> * or (post <a href="#">NEXT</a> market*)) <a href="#">NEAR/3</a> surveillance):ti,ab,kw                                                                                                                  | Limits | 732   |
| - | + | #62 | "Clinical Trial, Phase IV":pt                                                                                                                                                                                                          | Limits | 1201  |
| - | + | #63 | ((("Phase 4" or "Phase IV") <a href="#">NEAR/3</a> (evaluation* or study or studies or trial or trials)):ti,ab,kw                                                                                                                      | Limits | 2770  |
| - | + | #64 | [ <a href="#">mh</a> " <a href="#">Cardiomyopathies</a> "]                                                                                                                                                                             | Limits | 677   |
| - | + | #65 | ( <a href="#">cardiomyopath</a> * or ( <a href="#">cardio</a> <a href="#">NEXT</a> <a href="#">myopath</a> *) or <a href="#">myocardiopath</a> * or ( <a href="#">myo</a> <a href="#">NEXT</a> <a href="#">cardiopath</a> ")):ti,ab,kw | Limits | 4440  |
| - | + | #66 | [ <a href="#">mh</a> <a href="#">Myocarditis</a> ]                                                                                                                                                                                     | Limits | 93    |
| - | + | #67 | <a href="#">myocarditis</a> :ti,ab,kw                                                                                                                                                                                                  | Limits | 1208  |
| - | + | #68 | (( <a href="#">myocard</a> * or ( <a href="#">myo</a> <a href="#">NEXT</a> card*)) <a href="#">NEAR/3</a> <a href="#">inflam</a> ):ti,ab,kw                                                                                            | Limits | 268   |
| - | + | #69 | <a href="#">carditis</a> :ti,ab,kw                                                                                                                                                                                                     | Limits | 36    |
| - | + | #70 | [ <a href="#">mh</a> <a href="#">Pericarditis</a> ]                                                                                                                                                                                    | Limits | 63    |
| - | + | #71 | <a href="#">pericarditis</a> :ti,ab,kw                                                                                                                                                                                                 | Limits | 349   |
| - | + | #72 | (( <a href="#">pericard</a> * or ( <a href="#">peri</a> <a href="#">NEXT</a> card*)) <a href="#">NEAR/3</a> <a href="#">inflam</a> ):ti,ab,kw                                                                                          | Limits | 22    |
| - | + | #73 | <a href="#">epicarditis</a> :ti,ab,kw                                                                                                                                                                                                  | Limits | 2     |
| - | + | #74 | (( <a href="#">epicard</a> * or ( <a href="#">epi</a> <a href="#">NEXT</a> card*)) <a href="#">NEAR/3</a> <a href="#">inflam</a> ):ti,ab,kw                                                                                            | Limits | 5     |
| - | + | #75 | ( <a href="#">myopericarditis</a> or " <a href="#">myo-pericarditis</a> "):ti,ab,kw                                                                                                                                                    | Limits | 12    |
| - | + | #76 | (( <a href="#">myopericard</a> * or ( <a href="#">myo</a> <a href="#">NEXT</a> <a href="#">pericard</a> *)) <a href="#">NEAR/3</a> <a href="#">inflam</a> ):ti,ab,kw                                                                   | Limits | 1     |
| - | + | #77 | ( <a href="#">pleuropericarditis</a> or " <a href="#">pleuro-pericarditis</a> "):ti,ab,kw                                                                                                                                              | Limits | 3     |
| - | + | #78 | (( <a href="#">pleuropericard</a> * or ( <a href="#">pleuro</a> <a href="#">NEXT</a> <a href="#">pericard</a> *)) <a href="#">NEAR/3</a> <a href="#">inflam</a> ):ti,ab,kw                                                             | Limits | 0     |
| - | + | #79 | [or #48-#78]                                                                                                                                                                                                                           | Limits | 27721 |
| - | + | #80 | #47 AND #79                                                                                                                                                                                                                            | Limits | 339   |

with Cochrane Library publication date from Oct 2020 to Oct 2021

6-Oct-21

Original    Deduped

|         |      |      |
|---------|------|------|
| MEDLINE | 2530 | 2511 |
| Embase  | 705  | 675  |
| CDSR    | 2    | 0    |
| CENTRAL | 337  | 253  |
| TOTAL   | 3574 | 3439 |



## Appendix 2. Literature flow

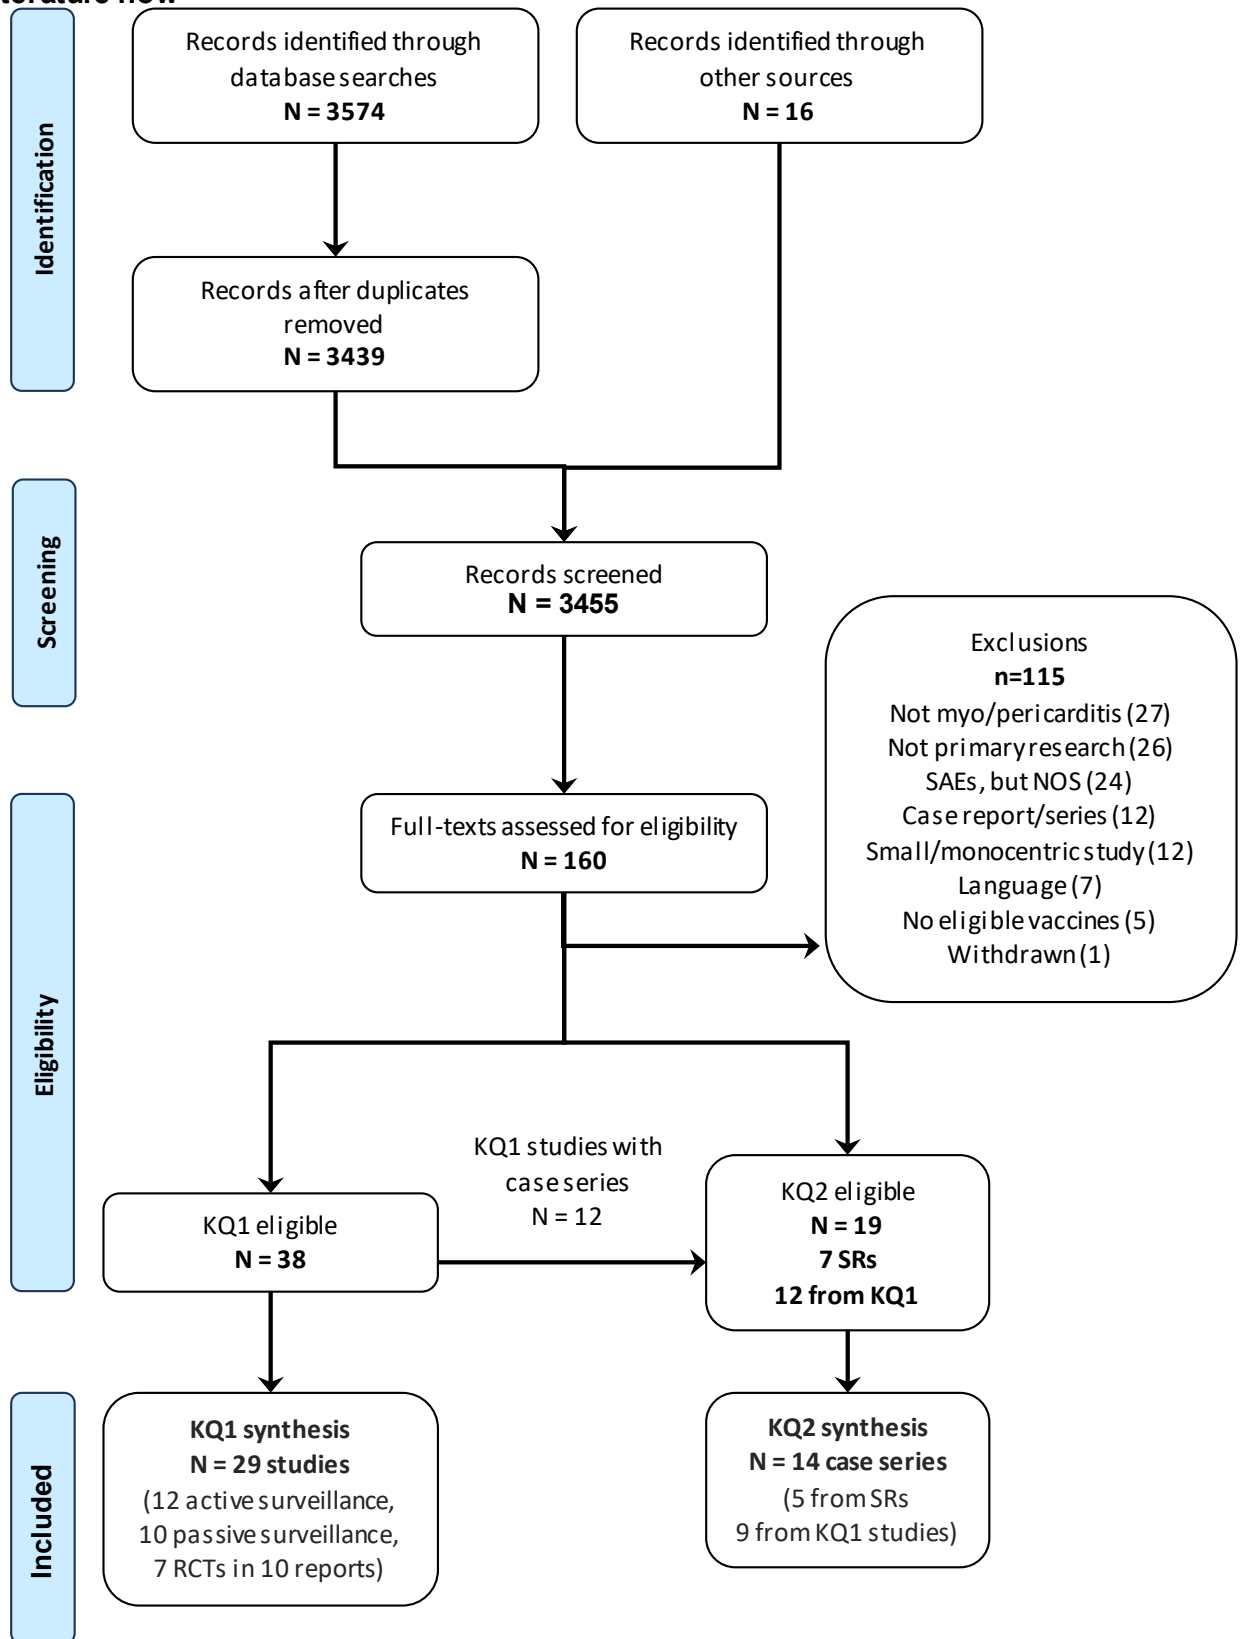

### Appendix 3. Supplements to Tables 2 and 3

#### Descriptions of surveillance systems used in studies within this report

CAEFISS: Managed by PHAC, monitors the safety of marketed vaccines in Canada through both passive and active reporting strategies. Reports are submitted by public health authorities in provinces and territories, who in turn receive them from local public health units. Provincial and territorial authorities also receive reports from federal authorities that provide immunization in their jurisdictions. Active surveillance is also carried out by 12 pediatric centres across Canada, which screen all hospital admissions for potential vaccine-related adverse events.

CVP: Passive surveillance program that collects reports of suspected adverse reactions to health products. Reports are submitted by health professionals and consumers on a voluntary basis either directly to Health Canada or to the market authorization holder, who in turn is required to submit reports of adverse events to Health Canada through the Canada Vigilance Program.

EudraVigilance: Passive surveillance system for the European Economic Area. Healthcare providers and patients can report any adverse effects from medical products, including vaccines. Patients, consumers and healthcare professionals report suspected side effects to either the national medicines regulatory authority or the pharmaceutical company that holds the marketing authorisation for the medicine. These reports are then transmitted electronically to EudraVigilance.

VAERS: Passive surveillance system for the United States, to which healthcare providers and patients can report adverse events from medical products, including vaccines. Providers are required to report to VAERS adverse events (including administration errors, serious adverse events, cases of multisystem inflammatory syndrome, and cases of COVID-19 that result in hospitalization or death) that occur after receipt of any COVID-19 vaccine.

Yellow Card: The Yellow Card scheme in the United Kingdom is a passive surveillance system to which anybody can voluntarily report any suspected adverse reactions or side effects to the vaccine. The reports are continually reviewed to detect possible new side effects that may require regulatory action, and to differentiate these from things that would have happened regardless of the vaccine or medicine being administered, for instance due to underlying or undiagnosed illness.

#### References for included studies in question 1 labeled based on data sources

| Study                      | Reference(s)                                                                                                                                                                                                                                                                                                                                          |
|----------------------------|-------------------------------------------------------------------------------------------------------------------------------------------------------------------------------------------------------------------------------------------------------------------------------------------------------------------------------------------------------|
| <b>Active Surveillance</b> |                                                                                                                                                                                                                                                                                                                                                       |
| Clalit Health May 24a      | Witberg G, Barda N, Hoss S, et al. Myocarditis after Covid-19 Vaccination in a Large Health Care Organization. N Engl J Med. 2021. doi: <a href="https://dx.doi.org/10.1056/NEJMoa2110737">https://dx.doi.org/10.1056/NEJMoa2110737</a> .                                                                                                             |
| Clalit Health May 24b      | Barda N, Dagan N, Ben-Shlomo Y, et al. Safety of the BNT162b2 mRNA Covid-19 Vaccine in a Nationwide Setting. N Engl J Med. 2021;385(12):1078-1090. doi: <a href="https://dx.doi.org/10.1056/NEJMoa2110475">https://dx.doi.org/10.1056/NEJMoa2110475</a> .                                                                                             |
| Genesis Healthcare Jan 3   | Bardenheier BH, Gravenstein S, Blackman C, et al. Adverse events following mRNA SARS-CoV-2 vaccination among U.S. nursing home residents. Vaccine. 2021;39(29):3844-3851. doi: <a href="https://dx.doi.org/10.1016/j.vaccine.2021.05.088">https://dx.doi.org/10.1016/j.vaccine.2021.05.088</a> .                                                      |
| Genesis Healthcare Feb 14  | Bardenheier BH, Gravenstein S, Blackman C, et al. Adverse Events Following One Dose of mRNA COVID-19 Vaccination Among US Nursing Home Residents With and Without a Previous SARS-CoV-2 Infection. J Am Med Dir Assoc. 2021;28:28. doi: <a href="https://dx.doi.org/10.1016/j.jamda.2021.08.024">https://dx.doi.org/10.1016/j.jamda.2021.08.024</a> . |

| Study                        | Reference(s)                                                                                                                                                                                                                                                                                                                                                                                                                             |
|------------------------------|------------------------------------------------------------------------------------------------------------------------------------------------------------------------------------------------------------------------------------------------------------------------------------------------------------------------------------------------------------------------------------------------------------------------------------------|
| Israel MOH May 31            | Mevorach D, Anis E, Cedar N, et al. Myocarditis after BNT162b2 mRNA Vaccine against Covid-19 in Israel. N Engl J Med. 2021. doi: <a href="https://dx.doi.org/10.1056/NEJMoa2109730">https://dx.doi.org/10.1056/NEJMoa2109730</a> .                                                                                                                                                                                                       |
| Israeli Defense Forces May 7 | Levin D, Shimon G, Fadlon-Deraï M, et al. Myocarditis following COVID-19 vaccination - A case series. Vaccine. 2021;39(42):6195-6200. doi: <a href="https://dx.doi.org/10.1016/j.vaccine.2021.09.004">https://dx.doi.org/10.1016/j.vaccine.2021.09.004</a> .                                                                                                                                                                             |
| KPSC Jul 20                  | Simone A, Herald J, Chen A, et al. Acute Myocarditis Following COVID-19 mRNA Vaccination in Adults Aged 18 Years or Older. JAMA Intern Med. 2021;04:04. doi: <a href="https://dx.doi.org/10.1001/jamainternmed.2021.5511">https://dx.doi.org/10.1001/jamainternmed.2021.5511</a> .                                                                                                                                                       |
| Providence Health May 25     | Diaz GA, Parsons GT, Gering SK, Meier AR, Hutchinson IV, Robicsek A. Myocarditis and Pericarditis After Vaccination for COVID-19. Jama. 2021;326(12):1210-1212. doi: <a href="https://dx.doi.org/10.1001/jama.2021.13443">https://dx.doi.org/10.1001/jama.2021.13443</a> .                                                                                                                                                               |
| US Military Apr 30           | Montgomery J, Ryan M, Engler R, et al. Myocarditis Following Immunization With mRNA COVID-19 Vaccines in Members of the US Military. JAMA Cardiol. 2021;29:29. doi: <a href="https://dx.doi.org/10.1001/jamacardio.2021.2833">https://dx.doi.org/10.1001/jamacardio.2021.2833</a> .                                                                                                                                                      |
| VSD Jun 26                   | Klein NP, Lewis N, Goddard K, et al. Surveillance for Adverse Events After COVID-19 mRNA Vaccination. Jama. 2021;03:03. doi: <a href="https://dx.doi.org/10.1001/jama.2021.15072">https://dx.doi.org/10.1001/jama.2021.15072</a> .                                                                                                                                                                                                       |
| VSD Aug 21                   | Klein NP. Rapid Cycle Analysis to Monitor the Safety of COVID-19 Vaccines in Near Real-Time within the Vaccine Safety Datalink: Myocarditis and Anaphylaxis. Aug 30 Advisory Committee on Immunization Practices (ACIP) <a href="https://www.cdc.gov/vaccines/acip/meetings/downloads/slides-2021-08-30/04-COVID-Klein-508.pdf">https://www.cdc.gov/vaccines/acip/meetings/downloads/slides-2021-08-30/04-COVID-Klein-508.pdf</a>        |
| VSD Oct 6                    | Klein NP. Myocarditis Analysis in the Vaccine Safety Datalink: Rapid Cycle Analyses and "Head-to-Head" Product Comparisons. 21 October 2021 2021. Advisory Committee on Immunization Practices (ACIP). Available from: <a href="https://www.cdc.gov/vaccines/acip/meetings/downloads/slides-2021-10-20-21/08-COVID-Klein-508.pdf">https://www.cdc.gov/vaccines/acip/meetings/downloads/slides-2021-10-20-21/08-COVID-Klein-508.pdf</a> . |
| <b>Passive Surveillance</b>  |                                                                                                                                                                                                                                                                                                                                                                                                                                          |
| CAEFISS & CVP                | Public Health Agency of Canada. Canadian COVID-19 vaccination safety report. Ottawa: Public Health Agency of Canada; October 18, 2021 2021. Available from: <a href="https://health-infobase.canada.ca/covid-19/vaccine-safety/#a4">https://health-infobase.canada.ca/covid-19/vaccine-safety/#a4</a> .                                                                                                                                  |
| EudraVigilance Oct 19        | European Medicines Agency. EudraVigilance - European database of suspected adverse drug reaction reports. European Medicines Agency. Available from: <a href="https://www.adrreports.eu/en/eudravigilance.html">https://www.adrreports.eu/en/eudravigilance.html</a> . Published 2021. Accessed October 26, 2021, 2021.                                                                                                                  |
| Israel MOH May 30            | Israel Ministry of Health. Surveillance of Myocarditis (Inflammation of the Heart Muscle) Cases Between December 2020 and May 2021 (Including). Available from: <a href="https://www.gov.il/en/departments/news/01062021-03">https://www.gov.il/en/departments/news/01062021-03</a> . Published 2021. Updated June 2, 2021. Accessed.                                                                                                    |

| Study                                        | Reference(s)                                                                                                                                                                                                                                                                                                                                                                                                                                                                                                                                                |
|----------------------------------------------|-------------------------------------------------------------------------------------------------------------------------------------------------------------------------------------------------------------------------------------------------------------------------------------------------------------------------------------------------------------------------------------------------------------------------------------------------------------------------------------------------------------------------------------------------------------|
| VAERS Jun 11                                 | Gargano JW, Wallace M, Hadler SC, et al. Use of mRNA COVID-19 Vaccine After Reports of Myocarditis Among Vaccine Recipients: Update from the Advisory Committee on Immunization Practices - United States, June 2021. MMWR Morb Mortal Wkly Rep. 2021;70(27):977-982. doi: <a href="https://dx.doi.org/10.15585/mmwr.mm7027e2">https://dx.doi.org/10.15585/mmwr.mm7027e2</a> .                                                                                                                                                                              |
| VAERS Jun 18a                                | Høeg TB, Krug A, Stevenson J, Mandrola J. SARS-CoV-2 mRNA Vaccination-Associated Myocarditis in Children Ages 12-17: A Stratified National Database Analysis. 2021. doi: <a href="https://dx.doi.org/10.1101/2021.08.30.21262866">https://dx.doi.org/10.1101/2021.08.30.21262866</a> .                                                                                                                                                                                                                                                                      |
| VAERS Jun 18b                                | Lazaros G, Anastassopoulou C, Hatziantoniou S, et al. A case series of acute pericarditis following COVID-19 vaccination in the context of recent reports from Europe and the United States. Vaccine. 2021. doi: <a href="https://dx.doi.org/10.1016/j.vaccine.2021.09.078">https://dx.doi.org/10.1016/j.vaccine.2021.09.078</a> .                                                                                                                                                                                                                          |
| VAERS Jun 30                                 | Rosenblum HG, Hadler SC, Moulia D, et al. Use of COVID-19 Vaccines After Reports of Adverse Events Among Adult Recipients of Janssen (Johnson & Johnson) and mRNA COVID-19 Vaccines (Pfizer-BioNTech and Moderna): Update from the Advisory Committee on Immunization Practices - United States, July 2021. MMWR Morb Mortal Wkly Rep. 2021;70(32):1094-1099. doi: <a href="https://dx.doi.org/10.15585/mmwr.mm7032e4">https://dx.doi.org/10.15585/mmwr.mm7032e4</a> .                                                                                      |
| VAERS Aug 6                                  | Lane S, Shakir S. Reports of myocarditis and pericarditis following mRNA COVID-19 vaccines: A review of spontaneously reported data from the UK, Europe, and the U. 2021. doi: <a href="https://dx.doi.org/10.1101/2021.09.09.21263342">https://dx.doi.org/10.1101/2021.09.09.21263342</a> .                                                                                                                                                                                                                                                                |
| VAERS Oct 6                                  | Su JR. Myopericarditis following COVID-19 vaccination: Updates from the Vaccine Adverse Event Reporting System (VAERS). CDC October 21, 2021 2021. Available from: <a href="https://www.cdc.gov/vaccines/acip/meetings/downloads/slides-2021-10-20-21/07-COVID-Su-508.pdf">https://www.cdc.gov/vaccines/acip/meetings/downloads/slides-2021-10-20-21/07-COVID-Su-508.pdf</a> .                                                                                                                                                                              |
| Yellow Card Oct 13                           | Medicine & Healthcare products Regulatory Agency. Coronavirus vaccine - weekly summary of Yellow Card reporting. Government of the United Kingdom. Available from: <a href="https://www.gov.uk/government/publications/coronavirus-covid-19-vaccine-adverse-reactions/coronavirus-vaccine-summary-of-yellow-card-reporting">https://www.gov.uk/government/publications/coronavirus-covid-19-vaccine-adverse-reactions/coronavirus-vaccine-summary-of-yellow-card-reporting</a> . Published 2021. Updated October 21, 2021. Accessed October 21, 2021, 2021. |
| <b>Randomized Controlled Trials</b>          |                                                                                                                                                                                                                                                                                                                                                                                                                                                                                                                                                             |
| AZD1222 Trial, Phase 3 (AstraZeneca)         | Falsey AR, Sobieszczyk ME, Hirsch I, et al. Phase 3 Safety and Efficacy of AZD1222 (ChAdOx1 nCoV-19) Covid-19 Vaccine. N Engl J Med. 2021;29:29. doi: <a href="https://dx.doi.org/10.1056/NEJMoa2105290">https://dx.doi.org/10.1056/NEJMoa2105290</a> .                                                                                                                                                                                                                                                                                                     |
| AZD1222 Trial, Pooled Analysis (AstraZeneca) | Voysey M, Clemens SAC, Madhi SA, et al. Safety and efficacy of the ChAdOx1 nCoV-19 vaccine (AZD1222) against SARS-CoV-2: an interim analysis of four randomised controlled trials in Brazil, South Africa, and the UK. Lancet. 2021;397(10269):99-111. doi: <a href="https://dx.doi.org/10.1016/S0140-6736(20)32661-1">https://dx.doi.org/10.1016/S0140-6736(20)32661-1</a> .                                                                                                                                                                               |
|                                              | Voysey M, Costa Clemens SA, Madhi SA, et al. Single-dose administration and the influence of the timing of the booster dose on immunogenicity and efficacy of ChAdOx1 nCoV-19 (AZD1222) vaccine: a pooled analysis of four randomised trials. Lancet. 2021;397(10277):881-891. doi: <a href="https://dx.doi.org/10.1016/S0140-6736(21)00432-3">https://dx.doi.org/10.1016/S0140-6736(21)00432-3</a> .                                                                                                                                                       |

| Study                                      | Reference(s)                                                                                                                                                                                                                                                                                                                                                                                                                                                                                                   |
|--------------------------------------------|----------------------------------------------------------------------------------------------------------------------------------------------------------------------------------------------------------------------------------------------------------------------------------------------------------------------------------------------------------------------------------------------------------------------------------------------------------------------------------------------------------------|
| C4591001 Trial, Adolescent cohort (Pfizer) | Frenck RW, Jr., Klein NP, Kitchin N, et al. Safety, Immunogenicity, and Efficacy of the BNT162b2 Covid-19 Vaccine in Adolescents. N Engl J Med. 2021;385(3):239-250. doi: <a href="https://dx.doi.org/10.1056/NEJMoa2107456">https://dx.doi.org/10.1056/NEJMoa2107456</a> .                                                                                                                                                                                                                                    |
| C4591001 Trial, Adult cohort (Pfizer)      | Polack FP, Thomas SJ, Kitchin N, et al. Safety and Efficacy of the BNT162b2 mRNA Covid-19 Vaccine. N Engl J Med. 2020;383(27):2603-2615. doi: <a href="https://dx.doi.org/10.1056/NEJMoa2034577">https://dx.doi.org/10.1056/NEJMoa2034577</a> .<br>Thomas SJ, Moreira ED, Jr., Kitchin N, et al. Safety and Efficacy of the BNT162b2 mRNA Covid-19 Vaccine through 6 Months. N Engl J Med. 2021; 15:15. doi: <a href="https://dx.doi.org/10.1056/NEJMoa2110345">https://dx.doi.org/10.1056/NEJMoa2110345</a> . |
| COVE trial (Moderna)                       | Baden LR, El Sahly HM, Essink B, et al. Efficacy and Safety of the mRNA-1273 SARS-CoV-2 Vaccine. N Engl J Med. 2021;384(5):403-416. doi: <a href="https://dx.doi.org/10.1056/NEJMoa2035389">https://dx.doi.org/10.1056/NEJMoa2035389</a> .<br>El Sahly HM, Baden LR, Essink B, et al. Efficacy of the mRNA-1273 SARS-CoV-2 Vaccine at Completion of Blinded Phase. N Engl J Med. 2021. doi: <a href="https://dx.doi.org/10.1056/NEJMoa2113017">https://dx.doi.org/10.1056/NEJMoa2113017</a> .                  |
| Teen COVE trial (Moderna)                  | Ali K, Berman G, Zhou H, et al. Evaluation of mRNA-1273 SARS-CoV-2 Vaccine in Adolescents. N Engl J Med. 2021;11:11. doi: <a href="https://dx.doi.org/10.1056/NEJMoa2109522">https://dx.doi.org/10.1056/NEJMoa2109522</a> .                                                                                                                                                                                                                                                                                    |
| ENSEMBLE Trial (Janssen)                   | Sadoff J, Gray G, Vandebosch A, et al. Safety and Efficacy of Single-Dose Ad26.COV2.S Vaccine against Covid-19. N Engl J Med. 2021;384(23):2187-2201. doi: <a href="https://dx.doi.org/10.1056/NEJMoa2101544">https://dx.doi.org/10.1056/NEJMoa2101544</a> .                                                                                                                                                                                                                                                   |

**Appendix 4: Study Characteristics Tables and Risk of Bias Tables**

**Table A1. Study characteristics of observational studies using data from active surveillance systems (question 1)**

| Dataset Dates<br>Country                                                   | Vaccines Studied                                        | Sample Size;<br>Demographics;<br>Previous Covid-19<br>diagnoses                                                                                                                             | Study Group(s)                                                                                                                                                                                                                                               | Outcome(s); Risk<br>Interval; Case<br>Ascertainment                                                                                                                                                                                                                                                                                                                                         | Analysis                                                                                                                                                                                                                                                                                                                                                                                                                                                                                                                                                                                             | Results                                                                                                                                                                                                                                                                                                                                                                                                                                                                                                                                                                                                                                                                                                                                                                                                                                                                                                                                                                                                                                                                                                                                                                                                                                                                                                                                                                                                                                                                                                                                                                                                                                                                                                                                                                                                                    |  |               |                               |            |                       |      |        |                        |      |                          |                       |      |        |                        |      |                           |                        |      |        |                  |      |  |               |                               |            |                       |     |        |                       |      |        |                      |     |        |                      |     |         |                        |      |        |                 |      |
|----------------------------------------------------------------------------|---------------------------------------------------------|---------------------------------------------------------------------------------------------------------------------------------------------------------------------------------------------|--------------------------------------------------------------------------------------------------------------------------------------------------------------------------------------------------------------------------------------------------------------|---------------------------------------------------------------------------------------------------------------------------------------------------------------------------------------------------------------------------------------------------------------------------------------------------------------------------------------------------------------------------------------------|------------------------------------------------------------------------------------------------------------------------------------------------------------------------------------------------------------------------------------------------------------------------------------------------------------------------------------------------------------------------------------------------------------------------------------------------------------------------------------------------------------------------------------------------------------------------------------------------------|----------------------------------------------------------------------------------------------------------------------------------------------------------------------------------------------------------------------------------------------------------------------------------------------------------------------------------------------------------------------------------------------------------------------------------------------------------------------------------------------------------------------------------------------------------------------------------------------------------------------------------------------------------------------------------------------------------------------------------------------------------------------------------------------------------------------------------------------------------------------------------------------------------------------------------------------------------------------------------------------------------------------------------------------------------------------------------------------------------------------------------------------------------------------------------------------------------------------------------------------------------------------------------------------------------------------------------------------------------------------------------------------------------------------------------------------------------------------------------------------------------------------------------------------------------------------------------------------------------------------------------------------------------------------------------------------------------------------------------------------------------------------------------------------------------------------------|--|---------------|-------------------------------|------------|-----------------------|------|--------|------------------------|------|--------------------------|-----------------------|------|--------|------------------------|------|---------------------------|------------------------|------|--------|------------------|------|--|---------------|-------------------------------|------------|-----------------------|-----|--------|-----------------------|------|--------|----------------------|-----|--------|----------------------|-----|---------|------------------------|------|--------|-----------------|------|
| VSD† Oct 9<br><br>Dec 14 2020 to<br>Oct 9<br><br>USA<br><br>(Klein, 2021a) | Pfizer-<br>BioNTech<br>(60% of<br>dose 2) or<br>Moderna | Total doses 14,214,955<br>(71.5% eligible people<br>fully vaccinated) to 7.5<br>million people<br><br>NR<br><br>Excluded from analysis if<br>COVID-19 diagnosis ≤30<br>d before vaccination | 1. Vaccinated in previous<br>0-21 d<br>2. Concurrent previous<br>vaccinees (22 to 42 d<br>previously for similar<br>individuals after vaccine<br>dose 1 or 2 [most dose<br>2])<br><br>Interval between doses:<br>majority 21 d (Pfizer) and<br>28 d Moderna) | Myocarditis/pericarditis/<br>myopericarditis (combined<br>& separate for head-to-<br>head comparison)<br><br>ICD-10 using inclusion and<br>exclusionary codes via<br>clinical expert consultation;<br>cases among 12-39 y<br>confirmed by medical<br>record review<br><br>ED and in-patient records<br>used<br><br>Blinding to vaccine status<br>NR<br><br>Risk interval: 0-21 d & 0-7<br>d | Weekly, rapid cycle<br>analysis<br><br>Adjusted incident rate<br>ratio (aIRR) estimated by<br>Poisson regression<br>adjusted for age, sex,<br>race and ethnicity, health<br>plan, and calendar day;<br>1-sided P < .0048 for<br>statistical signal<br><br>Excess risk/incidence<br>per million doses (IR –<br>[IR/IRR])<br><br><u>Exploratory analyses</u><br>(no prespecified level of<br>significance): by dose<br>and vaccine type; for 12-<br>39 y by dose, vaccine<br>type and with shorter risk<br>intervals; head-to-head<br>Moderna vs Pfizer in 18-<br>39 y (also excluded<br>pericarditis) | Events: 138 (not confirmed) after either dose<br>Incidence: 138/14,214,955 = 9.7 per million doses<br>aIRR: 1.72 p <.001 (statistical signal)<br><br><u>Exploratory analyses:</u><br><br>12-39 y (all confirmed cases)<br><br>Group 1: 74 cases in 0-21 d interval (59 [80%] after dose 2; 39 [53%<br>in 0-7 d]); 44 (59%) in 18-39 y and 30 (40.5% in 12-17 y<br><br>Clustering at 0-5 d after vaccine (p<.0001)<br><br><b>0-7 d risk interval</b><br><table border="1"> <thead> <tr> <th></th> <th>aIRR (95% CI)</th> <th>Excess risk per million doses</th> </tr> </thead> <tbody> <tr> <td>Both doses</td> <td>21.73 (9.53 to 57.34)</td> <td>11.8</td> </tr> <tr> <td>Dose 2</td> <td>31.28 (12.83 to 91.40)</td> <td>21.1</td> </tr> <tr> <td>Pfizer (<u>12-39y</u>)</td> <td>19.31 (7.66 to 57.79)</td> <td>11.5</td> </tr> <tr> <td>Dose 2</td> <td>30.27 (11.01 to 104.4)</td> <td>21.5</td> </tr> <tr> <td>Moderna (<u>18-39y</u>)</td> <td>37.51 (6.69 to 803.00)</td> <td>12.8</td> </tr> <tr> <td>Dose 2</td> <td>NE (11.75 to NE)</td> <td>21.0</td> </tr> </tbody> </table><br>(For dose 1: aIRR range 8.7-10.5, all significant; excess cases 2.3-<br>5.2)<br><br><b>0-7 d risk interval (18-39 y only)</b><br><table border="1"> <thead> <tr> <th></th> <th>aIRR (95% CI)</th> <th>Excess risk per million doses</th> </tr> </thead> <tbody> <tr> <td>Both doses</td> <td>12.61 (5.27 to 34.47)</td> <td>8.4</td> </tr> <tr> <td>Dose 2</td> <td>14.33 (5.50 to 43.88)</td> <td>13.1</td> </tr> <tr> <td>Pfizer</td> <td>7.98 (2.72 to 26.50)</td> <td>5.7</td> </tr> <tr> <td>Dose 2</td> <td>8.77 (2.56 to 35.34)</td> <td>8.5</td> </tr> <tr> <td>Moderna</td> <td>37.42 (6.68 to 801.33)</td> <td>12.8</td> </tr> <tr> <td>Dose 2</td> <td>NE (11.70 – NE)</td> <td>21.0</td> </tr> </tbody> </table> |  | aIRR (95% CI) | Excess risk per million doses | Both doses | 21.73 (9.53 to 57.34) | 11.8 | Dose 2 | 31.28 (12.83 to 91.40) | 21.1 | Pfizer ( <u>12-39y</u> ) | 19.31 (7.66 to 57.79) | 11.5 | Dose 2 | 30.27 (11.01 to 104.4) | 21.5 | Moderna ( <u>18-39y</u> ) | 37.51 (6.69 to 803.00) | 12.8 | Dose 2 | NE (11.75 to NE) | 21.0 |  | aIRR (95% CI) | Excess risk per million doses | Both doses | 12.61 (5.27 to 34.47) | 8.4 | Dose 2 | 14.33 (5.50 to 43.88) | 13.1 | Pfizer | 7.98 (2.72 to 26.50) | 5.7 | Dose 2 | 8.77 (2.56 to 35.34) | 8.5 | Moderna | 37.42 (6.68 to 801.33) | 12.8 | Dose 2 | NE (11.70 – NE) | 21.0 |
|                                                                            | aIRR (95% CI)                                           | Excess risk per million doses                                                                                                                                                               |                                                                                                                                                                                                                                                              |                                                                                                                                                                                                                                                                                                                                                                                             |                                                                                                                                                                                                                                                                                                                                                                                                                                                                                                                                                                                                      |                                                                                                                                                                                                                                                                                                                                                                                                                                                                                                                                                                                                                                                                                                                                                                                                                                                                                                                                                                                                                                                                                                                                                                                                                                                                                                                                                                                                                                                                                                                                                                                                                                                                                                                                                                                                                            |  |               |                               |            |                       |      |        |                        |      |                          |                       |      |        |                        |      |                           |                        |      |        |                  |      |  |               |                               |            |                       |     |        |                       |      |        |                      |     |        |                      |     |         |                        |      |        |                 |      |
| Both doses                                                                 | 21.73 (9.53 to 57.34)                                   | 11.8                                                                                                                                                                                        |                                                                                                                                                                                                                                                              |                                                                                                                                                                                                                                                                                                                                                                                             |                                                                                                                                                                                                                                                                                                                                                                                                                                                                                                                                                                                                      |                                                                                                                                                                                                                                                                                                                                                                                                                                                                                                                                                                                                                                                                                                                                                                                                                                                                                                                                                                                                                                                                                                                                                                                                                                                                                                                                                                                                                                                                                                                                                                                                                                                                                                                                                                                                                            |  |               |                               |            |                       |      |        |                        |      |                          |                       |      |        |                        |      |                           |                        |      |        |                  |      |  |               |                               |            |                       |     |        |                       |      |        |                      |     |        |                      |     |         |                        |      |        |                 |      |
| Dose 2                                                                     | 31.28 (12.83 to 91.40)                                  | 21.1                                                                                                                                                                                        |                                                                                                                                                                                                                                                              |                                                                                                                                                                                                                                                                                                                                                                                             |                                                                                                                                                                                                                                                                                                                                                                                                                                                                                                                                                                                                      |                                                                                                                                                                                                                                                                                                                                                                                                                                                                                                                                                                                                                                                                                                                                                                                                                                                                                                                                                                                                                                                                                                                                                                                                                                                                                                                                                                                                                                                                                                                                                                                                                                                                                                                                                                                                                            |  |               |                               |            |                       |      |        |                        |      |                          |                       |      |        |                        |      |                           |                        |      |        |                  |      |  |               |                               |            |                       |     |        |                       |      |        |                      |     |        |                      |     |         |                        |      |        |                 |      |
| Pfizer ( <u>12-39y</u> )                                                   | 19.31 (7.66 to 57.79)                                   | 11.5                                                                                                                                                                                        |                                                                                                                                                                                                                                                              |                                                                                                                                                                                                                                                                                                                                                                                             |                                                                                                                                                                                                                                                                                                                                                                                                                                                                                                                                                                                                      |                                                                                                                                                                                                                                                                                                                                                                                                                                                                                                                                                                                                                                                                                                                                                                                                                                                                                                                                                                                                                                                                                                                                                                                                                                                                                                                                                                                                                                                                                                                                                                                                                                                                                                                                                                                                                            |  |               |                               |            |                       |      |        |                        |      |                          |                       |      |        |                        |      |                           |                        |      |        |                  |      |  |               |                               |            |                       |     |        |                       |      |        |                      |     |        |                      |     |         |                        |      |        |                 |      |
| Dose 2                                                                     | 30.27 (11.01 to 104.4)                                  | 21.5                                                                                                                                                                                        |                                                                                                                                                                                                                                                              |                                                                                                                                                                                                                                                                                                                                                                                             |                                                                                                                                                                                                                                                                                                                                                                                                                                                                                                                                                                                                      |                                                                                                                                                                                                                                                                                                                                                                                                                                                                                                                                                                                                                                                                                                                                                                                                                                                                                                                                                                                                                                                                                                                                                                                                                                                                                                                                                                                                                                                                                                                                                                                                                                                                                                                                                                                                                            |  |               |                               |            |                       |      |        |                        |      |                          |                       |      |        |                        |      |                           |                        |      |        |                  |      |  |               |                               |            |                       |     |        |                       |      |        |                      |     |        |                      |     |         |                        |      |        |                 |      |
| Moderna ( <u>18-39y</u> )                                                  | 37.51 (6.69 to 803.00)                                  | 12.8                                                                                                                                                                                        |                                                                                                                                                                                                                                                              |                                                                                                                                                                                                                                                                                                                                                                                             |                                                                                                                                                                                                                                                                                                                                                                                                                                                                                                                                                                                                      |                                                                                                                                                                                                                                                                                                                                                                                                                                                                                                                                                                                                                                                                                                                                                                                                                                                                                                                                                                                                                                                                                                                                                                                                                                                                                                                                                                                                                                                                                                                                                                                                                                                                                                                                                                                                                            |  |               |                               |            |                       |      |        |                        |      |                          |                       |      |        |                        |      |                           |                        |      |        |                  |      |  |               |                               |            |                       |     |        |                       |      |        |                      |     |        |                      |     |         |                        |      |        |                 |      |
| Dose 2                                                                     | NE (11.75 to NE)                                        | 21.0                                                                                                                                                                                        |                                                                                                                                                                                                                                                              |                                                                                                                                                                                                                                                                                                                                                                                             |                                                                                                                                                                                                                                                                                                                                                                                                                                                                                                                                                                                                      |                                                                                                                                                                                                                                                                                                                                                                                                                                                                                                                                                                                                                                                                                                                                                                                                                                                                                                                                                                                                                                                                                                                                                                                                                                                                                                                                                                                                                                                                                                                                                                                                                                                                                                                                                                                                                            |  |               |                               |            |                       |      |        |                        |      |                          |                       |      |        |                        |      |                           |                        |      |        |                  |      |  |               |                               |            |                       |     |        |                       |      |        |                      |     |        |                      |     |         |                        |      |        |                 |      |
|                                                                            | aIRR (95% CI)                                           | Excess risk per million doses                                                                                                                                                               |                                                                                                                                                                                                                                                              |                                                                                                                                                                                                                                                                                                                                                                                             |                                                                                                                                                                                                                                                                                                                                                                                                                                                                                                                                                                                                      |                                                                                                                                                                                                                                                                                                                                                                                                                                                                                                                                                                                                                                                                                                                                                                                                                                                                                                                                                                                                                                                                                                                                                                                                                                                                                                                                                                                                                                                                                                                                                                                                                                                                                                                                                                                                                            |  |               |                               |            |                       |      |        |                        |      |                          |                       |      |        |                        |      |                           |                        |      |        |                  |      |  |               |                               |            |                       |     |        |                       |      |        |                      |     |        |                      |     |         |                        |      |        |                 |      |
| Both doses                                                                 | 12.61 (5.27 to 34.47)                                   | 8.4                                                                                                                                                                                         |                                                                                                                                                                                                                                                              |                                                                                                                                                                                                                                                                                                                                                                                             |                                                                                                                                                                                                                                                                                                                                                                                                                                                                                                                                                                                                      |                                                                                                                                                                                                                                                                                                                                                                                                                                                                                                                                                                                                                                                                                                                                                                                                                                                                                                                                                                                                                                                                                                                                                                                                                                                                                                                                                                                                                                                                                                                                                                                                                                                                                                                                                                                                                            |  |               |                               |            |                       |      |        |                        |      |                          |                       |      |        |                        |      |                           |                        |      |        |                  |      |  |               |                               |            |                       |     |        |                       |      |        |                      |     |        |                      |     |         |                        |      |        |                 |      |
| Dose 2                                                                     | 14.33 (5.50 to 43.88)                                   | 13.1                                                                                                                                                                                        |                                                                                                                                                                                                                                                              |                                                                                                                                                                                                                                                                                                                                                                                             |                                                                                                                                                                                                                                                                                                                                                                                                                                                                                                                                                                                                      |                                                                                                                                                                                                                                                                                                                                                                                                                                                                                                                                                                                                                                                                                                                                                                                                                                                                                                                                                                                                                                                                                                                                                                                                                                                                                                                                                                                                                                                                                                                                                                                                                                                                                                                                                                                                                            |  |               |                               |            |                       |      |        |                        |      |                          |                       |      |        |                        |      |                           |                        |      |        |                  |      |  |               |                               |            |                       |     |        |                       |      |        |                      |     |        |                      |     |         |                        |      |        |                 |      |
| Pfizer                                                                     | 7.98 (2.72 to 26.50)                                    | 5.7                                                                                                                                                                                         |                                                                                                                                                                                                                                                              |                                                                                                                                                                                                                                                                                                                                                                                             |                                                                                                                                                                                                                                                                                                                                                                                                                                                                                                                                                                                                      |                                                                                                                                                                                                                                                                                                                                                                                                                                                                                                                                                                                                                                                                                                                                                                                                                                                                                                                                                                                                                                                                                                                                                                                                                                                                                                                                                                                                                                                                                                                                                                                                                                                                                                                                                                                                                            |  |               |                               |            |                       |      |        |                        |      |                          |                       |      |        |                        |      |                           |                        |      |        |                  |      |  |               |                               |            |                       |     |        |                       |      |        |                      |     |        |                      |     |         |                        |      |        |                 |      |
| Dose 2                                                                     | 8.77 (2.56 to 35.34)                                    | 8.5                                                                                                                                                                                         |                                                                                                                                                                                                                                                              |                                                                                                                                                                                                                                                                                                                                                                                             |                                                                                                                                                                                                                                                                                                                                                                                                                                                                                                                                                                                                      |                                                                                                                                                                                                                                                                                                                                                                                                                                                                                                                                                                                                                                                                                                                                                                                                                                                                                                                                                                                                                                                                                                                                                                                                                                                                                                                                                                                                                                                                                                                                                                                                                                                                                                                                                                                                                            |  |               |                               |            |                       |      |        |                        |      |                          |                       |      |        |                        |      |                           |                        |      |        |                  |      |  |               |                               |            |                       |     |        |                       |      |        |                      |     |        |                      |     |         |                        |      |        |                 |      |
| Moderna                                                                    | 37.42 (6.68 to 801.33)                                  | 12.8                                                                                                                                                                                        |                                                                                                                                                                                                                                                              |                                                                                                                                                                                                                                                                                                                                                                                             |                                                                                                                                                                                                                                                                                                                                                                                                                                                                                                                                                                                                      |                                                                                                                                                                                                                                                                                                                                                                                                                                                                                                                                                                                                                                                                                                                                                                                                                                                                                                                                                                                                                                                                                                                                                                                                                                                                                                                                                                                                                                                                                                                                                                                                                                                                                                                                                                                                                            |  |               |                               |            |                       |      |        |                        |      |                          |                       |      |        |                        |      |                           |                        |      |        |                  |      |  |               |                               |            |                       |     |        |                       |      |        |                      |     |        |                      |     |         |                        |      |        |                 |      |
| Dose 2                                                                     | NE (11.70 – NE)                                         | 21.0                                                                                                                                                                                        |                                                                                                                                                                                                                                                              |                                                                                                                                                                                                                                                                                                                                                                                             |                                                                                                                                                                                                                                                                                                                                                                                                                                                                                                                                                                                                      |                                                                                                                                                                                                                                                                                                                                                                                                                                                                                                                                                                                                                                                                                                                                                                                                                                                                                                                                                                                                                                                                                                                                                                                                                                                                                                                                                                                                                                                                                                                                                                                                                                                                                                                                                                                                                            |  |               |                               |            |                       |      |        |                        |      |                          |                       |      |        |                        |      |                           |                        |      |        |                  |      |  |               |                               |            |                       |     |        |                       |      |        |                      |     |        |                      |     |         |                        |      |        |                 |      |

| Dataset Dates Country                     | Vaccines Studied                         | Sample Size; Demographics; Previous Covid-19 diagnoses                | Study Group(s)                                                                                          | Outcome(s); Risk Interval; Case Ascertainment                                | Analysis | Results                                                                                                                                                                                                                                                                                                                                                                                                                                                                                                                                                                                                                                                                                                                                                                                                                                                                                                                                                                                                                                                                                                                                                                                                                                                                                                                                                                                                                                                                                                                                                                                                                                                                                                                                                                                                                                                                                                                                                                                                                                                                                                                                                                                                                                                                            |  |               |                               |        |                  |      |        |                  |      |  |               |                               |        |                 |      |        |                 |      |         |      |                               |            |                     |     |        |                     |      |                |                     |      |          |      |                               |            |                     |     |        |                     |      |         |      |                                |            |                     |     |        |                     |      |                |                     |      |          |      |                                |            |                             |     |        |                             |     |
|-------------------------------------------|------------------------------------------|-----------------------------------------------------------------------|---------------------------------------------------------------------------------------------------------|------------------------------------------------------------------------------|----------|------------------------------------------------------------------------------------------------------------------------------------------------------------------------------------------------------------------------------------------------------------------------------------------------------------------------------------------------------------------------------------------------------------------------------------------------------------------------------------------------------------------------------------------------------------------------------------------------------------------------------------------------------------------------------------------------------------------------------------------------------------------------------------------------------------------------------------------------------------------------------------------------------------------------------------------------------------------------------------------------------------------------------------------------------------------------------------------------------------------------------------------------------------------------------------------------------------------------------------------------------------------------------------------------------------------------------------------------------------------------------------------------------------------------------------------------------------------------------------------------------------------------------------------------------------------------------------------------------------------------------------------------------------------------------------------------------------------------------------------------------------------------------------------------------------------------------------------------------------------------------------------------------------------------------------------------------------------------------------------------------------------------------------------------------------------------------------------------------------------------------------------------------------------------------------------------------------------------------------------------------------------------------------|--|---------------|-------------------------------|--------|------------------|------|--------|------------------|------|--|---------------|-------------------------------|--------|-----------------|------|--------|-----------------|------|---------|------|-------------------------------|------------|---------------------|-----|--------|---------------------|------|----------------|---------------------|------|----------|------|-------------------------------|------------|---------------------|-----|--------|---------------------|------|---------|------|--------------------------------|------------|---------------------|-----|--------|---------------------|------|----------------|---------------------|------|----------|------|--------------------------------|------------|-----------------------------|-----|--------|-----------------------------|-----|
|                                           |                                          |                                                                       |                                                                                                         |                                                                              |          | <p>(For dose 1: aIRR range 8.05 to 10.47; all significant; excess cases 3.3 to 5.2)</p> <p><b>0-7 d risk interval (12-17 y only)</b></p> <table> <thead> <tr> <th></th> <th>aIRR (95% CI)</th> <th>Excess risk per million doses</th> </tr> </thead> <tbody> <tr> <td>Pfizer</td> <td>NE (16.88 to NE)</td> <td>29.6</td> </tr> <tr> <td>Dose 2</td> <td>NE (28.83 to NE)</td> <td>54.0</td> </tr> </tbody> </table> <p><b>0-21 d risk interval (12-17 y only)</b></p> <table> <thead> <tr> <th></th> <th>aIRR (95% CI)</th> <th>Excess risk per million doses</th> </tr> </thead> <tbody> <tr> <td>Pfizer</td> <td>NE (5.68 to NE)</td> <td>29.6</td> </tr> <tr> <td>Dose 2</td> <td>NE (9.09 to NE)</td> <td>56.7</td> </tr> </tbody> </table> <p><b>Head-to-head Moderna vs Pfizer in 18-39 y</b></p> <table> <thead> <tr> <th>(0-7 d)</th> <th>aIRR</th> <th>Excess risk per million doses</th> </tr> </thead> <tbody> <tr> <td>Both doses</td> <td>2.56 (1.32 to 5.03)</td> <td>8.0</td> </tr> <tr> <td>Dose 2</td> <td>2.72 (1.25 to 6.05)</td> <td>13.3</td> </tr> <tr> <td>Dose 2 (males)</td> <td>2.26 (1.00 to 5.19)</td> <td>21.5</td> </tr> </tbody> </table> <table> <thead> <tr> <th>(0-21 d)</th> <th>aIRR</th> <th>Excess risk per million doses</th> </tr> </thead> <tbody> <tr> <td>Both doses</td> <td>2.05 (1.11 to 3.83)</td> <td>7.1</td> </tr> <tr> <td>Dose 2</td> <td>2.19 (1.05 to 4.65)</td> <td>11.5</td> </tr> </tbody> </table> <p>Dose 1 all nonsignificant</p> <p><b>Head-to-head Moderna vs Pfizer in 18-39 y (without pericarditis)</b></p> <table> <thead> <tr> <th>(0-7 d)</th> <th>aIRR</th> <th>Excess cases per million doses</th> </tr> </thead> <tbody> <tr> <td>Both doses</td> <td>2.24 (1.09 to 4.63)</td> <td>5.6</td> </tr> <tr> <td>Dose 2</td> <td>2.28 (1.25 to 6.05)</td> <td>13.3</td> </tr> <tr> <td>Dose 2 (males)</td> <td>2.14 (0.93 to 4.98)</td> <td>19.1</td> </tr> </tbody> </table> <table> <thead> <tr> <th>(0-21 d)</th> <th>aIRR</th> <th>Excess cases per million doses</th> </tr> </thead> <tbody> <tr> <td>Both doses</td> <td>1.96 (<b>0.99</b> to 3.91)</td> <td>5.3</td> </tr> <tr> <td>Dose 2</td> <td>2.19 (<b>0.98</b> to 4.97)</td> <td>9.4</td> </tr> </tbody> </table> <p>Dose 1 all nonsignificant</p> |  | aIRR (95% CI) | Excess risk per million doses | Pfizer | NE (16.88 to NE) | 29.6 | Dose 2 | NE (28.83 to NE) | 54.0 |  | aIRR (95% CI) | Excess risk per million doses | Pfizer | NE (5.68 to NE) | 29.6 | Dose 2 | NE (9.09 to NE) | 56.7 | (0-7 d) | aIRR | Excess risk per million doses | Both doses | 2.56 (1.32 to 5.03) | 8.0 | Dose 2 | 2.72 (1.25 to 6.05) | 13.3 | Dose 2 (males) | 2.26 (1.00 to 5.19) | 21.5 | (0-21 d) | aIRR | Excess risk per million doses | Both doses | 2.05 (1.11 to 3.83) | 7.1 | Dose 2 | 2.19 (1.05 to 4.65) | 11.5 | (0-7 d) | aIRR | Excess cases per million doses | Both doses | 2.24 (1.09 to 4.63) | 5.6 | Dose 2 | 2.28 (1.25 to 6.05) | 13.3 | Dose 2 (males) | 2.14 (0.93 to 4.98) | 19.1 | (0-21 d) | aIRR | Excess cases per million doses | Both doses | 1.96 ( <b>0.99</b> to 3.91) | 5.3 | Dose 2 | 2.19 ( <b>0.98</b> to 4.97) | 9.4 |
|                                           | aIRR (95% CI)                            | Excess risk per million doses                                         |                                                                                                         |                                                                              |          |                                                                                                                                                                                                                                                                                                                                                                                                                                                                                                                                                                                                                                                                                                                                                                                                                                                                                                                                                                                                                                                                                                                                                                                                                                                                                                                                                                                                                                                                                                                                                                                                                                                                                                                                                                                                                                                                                                                                                                                                                                                                                                                                                                                                                                                                                    |  |               |                               |        |                  |      |        |                  |      |  |               |                               |        |                 |      |        |                 |      |         |      |                               |            |                     |     |        |                     |      |                |                     |      |          |      |                               |            |                     |     |        |                     |      |         |      |                                |            |                     |     |        |                     |      |                |                     |      |          |      |                                |            |                             |     |        |                             |     |
| Pfizer                                    | NE (16.88 to NE)                         | 29.6                                                                  |                                                                                                         |                                                                              |          |                                                                                                                                                                                                                                                                                                                                                                                                                                                                                                                                                                                                                                                                                                                                                                                                                                                                                                                                                                                                                                                                                                                                                                                                                                                                                                                                                                                                                                                                                                                                                                                                                                                                                                                                                                                                                                                                                                                                                                                                                                                                                                                                                                                                                                                                                    |  |               |                               |        |                  |      |        |                  |      |  |               |                               |        |                 |      |        |                 |      |         |      |                               |            |                     |     |        |                     |      |                |                     |      |          |      |                               |            |                     |     |        |                     |      |         |      |                                |            |                     |     |        |                     |      |                |                     |      |          |      |                                |            |                             |     |        |                             |     |
| Dose 2                                    | NE (28.83 to NE)                         | 54.0                                                                  |                                                                                                         |                                                                              |          |                                                                                                                                                                                                                                                                                                                                                                                                                                                                                                                                                                                                                                                                                                                                                                                                                                                                                                                                                                                                                                                                                                                                                                                                                                                                                                                                                                                                                                                                                                                                                                                                                                                                                                                                                                                                                                                                                                                                                                                                                                                                                                                                                                                                                                                                                    |  |               |                               |        |                  |      |        |                  |      |  |               |                               |        |                 |      |        |                 |      |         |      |                               |            |                     |     |        |                     |      |                |                     |      |          |      |                               |            |                     |     |        |                     |      |         |      |                                |            |                     |     |        |                     |      |                |                     |      |          |      |                                |            |                             |     |        |                             |     |
|                                           | aIRR (95% CI)                            | Excess risk per million doses                                         |                                                                                                         |                                                                              |          |                                                                                                                                                                                                                                                                                                                                                                                                                                                                                                                                                                                                                                                                                                                                                                                                                                                                                                                                                                                                                                                                                                                                                                                                                                                                                                                                                                                                                                                                                                                                                                                                                                                                                                                                                                                                                                                                                                                                                                                                                                                                                                                                                                                                                                                                                    |  |               |                               |        |                  |      |        |                  |      |  |               |                               |        |                 |      |        |                 |      |         |      |                               |            |                     |     |        |                     |      |                |                     |      |          |      |                               |            |                     |     |        |                     |      |         |      |                                |            |                     |     |        |                     |      |                |                     |      |          |      |                                |            |                             |     |        |                             |     |
| Pfizer                                    | NE (5.68 to NE)                          | 29.6                                                                  |                                                                                                         |                                                                              |          |                                                                                                                                                                                                                                                                                                                                                                                                                                                                                                                                                                                                                                                                                                                                                                                                                                                                                                                                                                                                                                                                                                                                                                                                                                                                                                                                                                                                                                                                                                                                                                                                                                                                                                                                                                                                                                                                                                                                                                                                                                                                                                                                                                                                                                                                                    |  |               |                               |        |                  |      |        |                  |      |  |               |                               |        |                 |      |        |                 |      |         |      |                               |            |                     |     |        |                     |      |                |                     |      |          |      |                               |            |                     |     |        |                     |      |         |      |                                |            |                     |     |        |                     |      |                |                     |      |          |      |                                |            |                             |     |        |                             |     |
| Dose 2                                    | NE (9.09 to NE)                          | 56.7                                                                  |                                                                                                         |                                                                              |          |                                                                                                                                                                                                                                                                                                                                                                                                                                                                                                                                                                                                                                                                                                                                                                                                                                                                                                                                                                                                                                                                                                                                                                                                                                                                                                                                                                                                                                                                                                                                                                                                                                                                                                                                                                                                                                                                                                                                                                                                                                                                                                                                                                                                                                                                                    |  |               |                               |        |                  |      |        |                  |      |  |               |                               |        |                 |      |        |                 |      |         |      |                               |            |                     |     |        |                     |      |                |                     |      |          |      |                               |            |                     |     |        |                     |      |         |      |                                |            |                     |     |        |                     |      |                |                     |      |          |      |                                |            |                             |     |        |                             |     |
| (0-7 d)                                   | aIRR                                     | Excess risk per million doses                                         |                                                                                                         |                                                                              |          |                                                                                                                                                                                                                                                                                                                                                                                                                                                                                                                                                                                                                                                                                                                                                                                                                                                                                                                                                                                                                                                                                                                                                                                                                                                                                                                                                                                                                                                                                                                                                                                                                                                                                                                                                                                                                                                                                                                                                                                                                                                                                                                                                                                                                                                                                    |  |               |                               |        |                  |      |        |                  |      |  |               |                               |        |                 |      |        |                 |      |         |      |                               |            |                     |     |        |                     |      |                |                     |      |          |      |                               |            |                     |     |        |                     |      |         |      |                                |            |                     |     |        |                     |      |                |                     |      |          |      |                                |            |                             |     |        |                             |     |
| Both doses                                | 2.56 (1.32 to 5.03)                      | 8.0                                                                   |                                                                                                         |                                                                              |          |                                                                                                                                                                                                                                                                                                                                                                                                                                                                                                                                                                                                                                                                                                                                                                                                                                                                                                                                                                                                                                                                                                                                                                                                                                                                                                                                                                                                                                                                                                                                                                                                                                                                                                                                                                                                                                                                                                                                                                                                                                                                                                                                                                                                                                                                                    |  |               |                               |        |                  |      |        |                  |      |  |               |                               |        |                 |      |        |                 |      |         |      |                               |            |                     |     |        |                     |      |                |                     |      |          |      |                               |            |                     |     |        |                     |      |         |      |                                |            |                     |     |        |                     |      |                |                     |      |          |      |                                |            |                             |     |        |                             |     |
| Dose 2                                    | 2.72 (1.25 to 6.05)                      | 13.3                                                                  |                                                                                                         |                                                                              |          |                                                                                                                                                                                                                                                                                                                                                                                                                                                                                                                                                                                                                                                                                                                                                                                                                                                                                                                                                                                                                                                                                                                                                                                                                                                                                                                                                                                                                                                                                                                                                                                                                                                                                                                                                                                                                                                                                                                                                                                                                                                                                                                                                                                                                                                                                    |  |               |                               |        |                  |      |        |                  |      |  |               |                               |        |                 |      |        |                 |      |         |      |                               |            |                     |     |        |                     |      |                |                     |      |          |      |                               |            |                     |     |        |                     |      |         |      |                                |            |                     |     |        |                     |      |                |                     |      |          |      |                                |            |                             |     |        |                             |     |
| Dose 2 (males)                            | 2.26 (1.00 to 5.19)                      | 21.5                                                                  |                                                                                                         |                                                                              |          |                                                                                                                                                                                                                                                                                                                                                                                                                                                                                                                                                                                                                                                                                                                                                                                                                                                                                                                                                                                                                                                                                                                                                                                                                                                                                                                                                                                                                                                                                                                                                                                                                                                                                                                                                                                                                                                                                                                                                                                                                                                                                                                                                                                                                                                                                    |  |               |                               |        |                  |      |        |                  |      |  |               |                               |        |                 |      |        |                 |      |         |      |                               |            |                     |     |        |                     |      |                |                     |      |          |      |                               |            |                     |     |        |                     |      |         |      |                                |            |                     |     |        |                     |      |                |                     |      |          |      |                                |            |                             |     |        |                             |     |
| (0-21 d)                                  | aIRR                                     | Excess risk per million doses                                         |                                                                                                         |                                                                              |          |                                                                                                                                                                                                                                                                                                                                                                                                                                                                                                                                                                                                                                                                                                                                                                                                                                                                                                                                                                                                                                                                                                                                                                                                                                                                                                                                                                                                                                                                                                                                                                                                                                                                                                                                                                                                                                                                                                                                                                                                                                                                                                                                                                                                                                                                                    |  |               |                               |        |                  |      |        |                  |      |  |               |                               |        |                 |      |        |                 |      |         |      |                               |            |                     |     |        |                     |      |                |                     |      |          |      |                               |            |                     |     |        |                     |      |         |      |                                |            |                     |     |        |                     |      |                |                     |      |          |      |                                |            |                             |     |        |                             |     |
| Both doses                                | 2.05 (1.11 to 3.83)                      | 7.1                                                                   |                                                                                                         |                                                                              |          |                                                                                                                                                                                                                                                                                                                                                                                                                                                                                                                                                                                                                                                                                                                                                                                                                                                                                                                                                                                                                                                                                                                                                                                                                                                                                                                                                                                                                                                                                                                                                                                                                                                                                                                                                                                                                                                                                                                                                                                                                                                                                                                                                                                                                                                                                    |  |               |                               |        |                  |      |        |                  |      |  |               |                               |        |                 |      |        |                 |      |         |      |                               |            |                     |     |        |                     |      |                |                     |      |          |      |                               |            |                     |     |        |                     |      |         |      |                                |            |                     |     |        |                     |      |                |                     |      |          |      |                                |            |                             |     |        |                             |     |
| Dose 2                                    | 2.19 (1.05 to 4.65)                      | 11.5                                                                  |                                                                                                         |                                                                              |          |                                                                                                                                                                                                                                                                                                                                                                                                                                                                                                                                                                                                                                                                                                                                                                                                                                                                                                                                                                                                                                                                                                                                                                                                                                                                                                                                                                                                                                                                                                                                                                                                                                                                                                                                                                                                                                                                                                                                                                                                                                                                                                                                                                                                                                                                                    |  |               |                               |        |                  |      |        |                  |      |  |               |                               |        |                 |      |        |                 |      |         |      |                               |            |                     |     |        |                     |      |                |                     |      |          |      |                               |            |                     |     |        |                     |      |         |      |                                |            |                     |     |        |                     |      |                |                     |      |          |      |                                |            |                             |     |        |                             |     |
| (0-7 d)                                   | aIRR                                     | Excess cases per million doses                                        |                                                                                                         |                                                                              |          |                                                                                                                                                                                                                                                                                                                                                                                                                                                                                                                                                                                                                                                                                                                                                                                                                                                                                                                                                                                                                                                                                                                                                                                                                                                                                                                                                                                                                                                                                                                                                                                                                                                                                                                                                                                                                                                                                                                                                                                                                                                                                                                                                                                                                                                                                    |  |               |                               |        |                  |      |        |                  |      |  |               |                               |        |                 |      |        |                 |      |         |      |                               |            |                     |     |        |                     |      |                |                     |      |          |      |                               |            |                     |     |        |                     |      |         |      |                                |            |                     |     |        |                     |      |                |                     |      |          |      |                                |            |                             |     |        |                             |     |
| Both doses                                | 2.24 (1.09 to 4.63)                      | 5.6                                                                   |                                                                                                         |                                                                              |          |                                                                                                                                                                                                                                                                                                                                                                                                                                                                                                                                                                                                                                                                                                                                                                                                                                                                                                                                                                                                                                                                                                                                                                                                                                                                                                                                                                                                                                                                                                                                                                                                                                                                                                                                                                                                                                                                                                                                                                                                                                                                                                                                                                                                                                                                                    |  |               |                               |        |                  |      |        |                  |      |  |               |                               |        |                 |      |        |                 |      |         |      |                               |            |                     |     |        |                     |      |                |                     |      |          |      |                               |            |                     |     |        |                     |      |         |      |                                |            |                     |     |        |                     |      |                |                     |      |          |      |                                |            |                             |     |        |                             |     |
| Dose 2                                    | 2.28 (1.25 to 6.05)                      | 13.3                                                                  |                                                                                                         |                                                                              |          |                                                                                                                                                                                                                                                                                                                                                                                                                                                                                                                                                                                                                                                                                                                                                                                                                                                                                                                                                                                                                                                                                                                                                                                                                                                                                                                                                                                                                                                                                                                                                                                                                                                                                                                                                                                                                                                                                                                                                                                                                                                                                                                                                                                                                                                                                    |  |               |                               |        |                  |      |        |                  |      |  |               |                               |        |                 |      |        |                 |      |         |      |                               |            |                     |     |        |                     |      |                |                     |      |          |      |                               |            |                     |     |        |                     |      |         |      |                                |            |                     |     |        |                     |      |                |                     |      |          |      |                                |            |                             |     |        |                             |     |
| Dose 2 (males)                            | 2.14 (0.93 to 4.98)                      | 19.1                                                                  |                                                                                                         |                                                                              |          |                                                                                                                                                                                                                                                                                                                                                                                                                                                                                                                                                                                                                                                                                                                                                                                                                                                                                                                                                                                                                                                                                                                                                                                                                                                                                                                                                                                                                                                                                                                                                                                                                                                                                                                                                                                                                                                                                                                                                                                                                                                                                                                                                                                                                                                                                    |  |               |                               |        |                  |      |        |                  |      |  |               |                               |        |                 |      |        |                 |      |         |      |                               |            |                     |     |        |                     |      |                |                     |      |          |      |                               |            |                     |     |        |                     |      |         |      |                                |            |                     |     |        |                     |      |                |                     |      |          |      |                                |            |                             |     |        |                             |     |
| (0-21 d)                                  | aIRR                                     | Excess cases per million doses                                        |                                                                                                         |                                                                              |          |                                                                                                                                                                                                                                                                                                                                                                                                                                                                                                                                                                                                                                                                                                                                                                                                                                                                                                                                                                                                                                                                                                                                                                                                                                                                                                                                                                                                                                                                                                                                                                                                                                                                                                                                                                                                                                                                                                                                                                                                                                                                                                                                                                                                                                                                                    |  |               |                               |        |                  |      |        |                  |      |  |               |                               |        |                 |      |        |                 |      |         |      |                               |            |                     |     |        |                     |      |                |                     |      |          |      |                               |            |                     |     |        |                     |      |         |      |                                |            |                     |     |        |                     |      |                |                     |      |          |      |                                |            |                             |     |        |                             |     |
| Both doses                                | 1.96 ( <b>0.99</b> to 3.91)              | 5.3                                                                   |                                                                                                         |                                                                              |          |                                                                                                                                                                                                                                                                                                                                                                                                                                                                                                                                                                                                                                                                                                                                                                                                                                                                                                                                                                                                                                                                                                                                                                                                                                                                                                                                                                                                                                                                                                                                                                                                                                                                                                                                                                                                                                                                                                                                                                                                                                                                                                                                                                                                                                                                                    |  |               |                               |        |                  |      |        |                  |      |  |               |                               |        |                 |      |        |                 |      |         |      |                               |            |                     |     |        |                     |      |                |                     |      |          |      |                               |            |                     |     |        |                     |      |         |      |                                |            |                     |     |        |                     |      |                |                     |      |          |      |                                |            |                             |     |        |                             |     |
| Dose 2                                    | 2.19 ( <b>0.98</b> to 4.97)              | 9.4                                                                   |                                                                                                         |                                                                              |          |                                                                                                                                                                                                                                                                                                                                                                                                                                                                                                                                                                                                                                                                                                                                                                                                                                                                                                                                                                                                                                                                                                                                                                                                                                                                                                                                                                                                                                                                                                                                                                                                                                                                                                                                                                                                                                                                                                                                                                                                                                                                                                                                                                                                                                                                                    |  |               |                               |        |                  |      |        |                  |      |  |               |                               |        |                 |      |        |                 |      |         |      |                               |            |                     |     |        |                     |      |                |                     |      |          |      |                               |            |                     |     |        |                     |      |         |      |                                |            |                     |     |        |                     |      |                |                     |      |          |      |                                |            |                             |     |        |                             |     |
| VSD† Aug 21<br>Dec 14 2020 to Aug 21 2021 | Pfizer-BioNTech (57% overall) or Moderna | Total doses 13,334,831 (66.5% fully vaccinated) to 7.1 million people | 1. Vaccinated in previous 0-21 d<br>2. Concurrent previous vaccinees (22 to 42 d previously for similar | Myocarditis/pericarditis/myopericarditis (combined)<br>Risk interval: 0-21 d |          | <p>Events: 115<br/>aIRR: 1.57 p=0.010 (not meeting p&lt;0.0048 signal)</p> <p><u>Subgroups:</u></p>                                                                                                                                                                                                                                                                                                                                                                                                                                                                                                                                                                                                                                                                                                                                                                                                                                                                                                                                                                                                                                                                                                                                                                                                                                                                                                                                                                                                                                                                                                                                                                                                                                                                                                                                                                                                                                                                                                                                                                                                                                                                                                                                                                                |  |               |                               |        |                  |      |        |                  |      |  |               |                               |        |                 |      |        |                 |      |         |      |                               |            |                     |     |        |                     |      |                |                     |      |          |      |                               |            |                     |     |        |                     |      |         |      |                                |            |                     |     |        |                     |      |                |                     |      |          |      |                                |            |                             |     |        |                             |     |

| Dataset Dates Country                                                       | Vaccines Studied                         | Sample Size; Demographics; Previous Covid-19 diagnoses                                                                                                                                                                                                                                               | Study Group(s)                                                                                                                                                                                                                                                                                          | Outcome(s); Risk Interval; Case Ascertainment                                                                                                                                                                                                                                                                               | Analysis                                                                                                                                                                                                                                                                                                                                                                                                                                                                                                                         | Results                                                                                                                                                                                                                                                                                                                                                                                                                                                                                                                                                                                                                                                                                                                                                                                                                                                                                                                                                                                                                                                                                                          |  |      |                               |            |                      |     |        |                      |      |      |  |  |        |                      |     |        |                      |      |      |  |  |         |                 |      |        |                 |      |
|-----------------------------------------------------------------------------|------------------------------------------|------------------------------------------------------------------------------------------------------------------------------------------------------------------------------------------------------------------------------------------------------------------------------------------------------|---------------------------------------------------------------------------------------------------------------------------------------------------------------------------------------------------------------------------------------------------------------------------------------------------------|-----------------------------------------------------------------------------------------------------------------------------------------------------------------------------------------------------------------------------------------------------------------------------------------------------------------------------|----------------------------------------------------------------------------------------------------------------------------------------------------------------------------------------------------------------------------------------------------------------------------------------------------------------------------------------------------------------------------------------------------------------------------------------------------------------------------------------------------------------------------------|------------------------------------------------------------------------------------------------------------------------------------------------------------------------------------------------------------------------------------------------------------------------------------------------------------------------------------------------------------------------------------------------------------------------------------------------------------------------------------------------------------------------------------------------------------------------------------------------------------------------------------------------------------------------------------------------------------------------------------------------------------------------------------------------------------------------------------------------------------------------------------------------------------------------------------------------------------------------------------------------------------------------------------------------------------------------------------------------------------------|--|------|-------------------------------|------------|----------------------|-----|--------|----------------------|------|------|--|--|--------|----------------------|-----|--------|----------------------|------|------|--|--|---------|-----------------|------|--------|-----------------|------|
| USA<br><br>(Klein 2021b)                                                    |                                          |                                                                                                                                                                                                                                                                                                      | individuals after vaccine dose 1 or 2 [most dose 2])                                                                                                                                                                                                                                                    |                                                                                                                                                                                                                                                                                                                             |                                                                                                                                                                                                                                                                                                                                                                                                                                                                                                                                  | <p>12-39 y<br/>56 cases in 0-21 d risk interval</p> <table border="0"> <tr> <td></td> <td>aIRR</td> <td>Excess risk per million doses</td> </tr> <tr> <td>Both doses</td> <td>5.63 (2.31 to 16.44)</td> <td>8.9</td> </tr> <tr> <td>Dose 2</td> <td>8.31 (3.07 to 28.28)</td> <td>15.5</td> </tr> <tr> <td colspan="3"><br/></td> </tr> <tr> <td>Pfizer</td> <td>3.62 (1.39 to 11.11)</td> <td>7.2</td> </tr> <tr> <td>Dose 2</td> <td>5.74 (1.98 to 20.52)</td> <td>13.6</td> </tr> <tr> <td colspan="3"><br/></td> </tr> <tr> <td>Moderna</td> <td>NE (3.32 to NE)</td> <td>12.7</td> </tr> <tr> <td>Dose 2</td> <td>NE (3.79 to NE)</td> <td>19.8</td> </tr> </table> <p>Dose 1 aIRR 2.3 to 3.8 and imprecise for separate vaccines</p> <p><b>For 0-7 risk interval – see more recent data in Klein Oct 21, 2021</b></p>                                                                                                                                                                                                                                                                                      |  | aIRR | Excess risk per million doses | Both doses | 5.63 (2.31 to 16.44) | 8.9 | Dose 2 | 8.31 (3.07 to 28.28) | 15.5 | <br> |  |  | Pfizer | 3.62 (1.39 to 11.11) | 7.2 | Dose 2 | 5.74 (1.98 to 20.52) | 13.6 | <br> |  |  | Moderna | NE (3.32 to NE) | 12.7 | Dose 2 | NE (3.79 to NE) | 19.8 |
|                                                                             | aIRR                                     | Excess risk per million doses                                                                                                                                                                                                                                                                        |                                                                                                                                                                                                                                                                                                         |                                                                                                                                                                                                                                                                                                                             |                                                                                                                                                                                                                                                                                                                                                                                                                                                                                                                                  |                                                                                                                                                                                                                                                                                                                                                                                                                                                                                                                                                                                                                                                                                                                                                                                                                                                                                                                                                                                                                                                                                                                  |  |      |                               |            |                      |     |        |                      |      |      |  |  |        |                      |     |        |                      |      |      |  |  |         |                 |      |        |                 |      |
| Both doses                                                                  | 5.63 (2.31 to 16.44)                     | 8.9                                                                                                                                                                                                                                                                                                  |                                                                                                                                                                                                                                                                                                         |                                                                                                                                                                                                                                                                                                                             |                                                                                                                                                                                                                                                                                                                                                                                                                                                                                                                                  |                                                                                                                                                                                                                                                                                                                                                                                                                                                                                                                                                                                                                                                                                                                                                                                                                                                                                                                                                                                                                                                                                                                  |  |      |                               |            |                      |     |        |                      |      |      |  |  |        |                      |     |        |                      |      |      |  |  |         |                 |      |        |                 |      |
| Dose 2                                                                      | 8.31 (3.07 to 28.28)                     | 15.5                                                                                                                                                                                                                                                                                                 |                                                                                                                                                                                                                                                                                                         |                                                                                                                                                                                                                                                                                                                             |                                                                                                                                                                                                                                                                                                                                                                                                                                                                                                                                  |                                                                                                                                                                                                                                                                                                                                                                                                                                                                                                                                                                                                                                                                                                                                                                                                                                                                                                                                                                                                                                                                                                                  |  |      |                               |            |                      |     |        |                      |      |      |  |  |        |                      |     |        |                      |      |      |  |  |         |                 |      |        |                 |      |
| <br>                                                                        |                                          |                                                                                                                                                                                                                                                                                                      |                                                                                                                                                                                                                                                                                                         |                                                                                                                                                                                                                                                                                                                             |                                                                                                                                                                                                                                                                                                                                                                                                                                                                                                                                  |                                                                                                                                                                                                                                                                                                                                                                                                                                                                                                                                                                                                                                                                                                                                                                                                                                                                                                                                                                                                                                                                                                                  |  |      |                               |            |                      |     |        |                      |      |      |  |  |        |                      |     |        |                      |      |      |  |  |         |                 |      |        |                 |      |
| Pfizer                                                                      | 3.62 (1.39 to 11.11)                     | 7.2                                                                                                                                                                                                                                                                                                  |                                                                                                                                                                                                                                                                                                         |                                                                                                                                                                                                                                                                                                                             |                                                                                                                                                                                                                                                                                                                                                                                                                                                                                                                                  |                                                                                                                                                                                                                                                                                                                                                                                                                                                                                                                                                                                                                                                                                                                                                                                                                                                                                                                                                                                                                                                                                                                  |  |      |                               |            |                      |     |        |                      |      |      |  |  |        |                      |     |        |                      |      |      |  |  |         |                 |      |        |                 |      |
| Dose 2                                                                      | 5.74 (1.98 to 20.52)                     | 13.6                                                                                                                                                                                                                                                                                                 |                                                                                                                                                                                                                                                                                                         |                                                                                                                                                                                                                                                                                                                             |                                                                                                                                                                                                                                                                                                                                                                                                                                                                                                                                  |                                                                                                                                                                                                                                                                                                                                                                                                                                                                                                                                                                                                                                                                                                                                                                                                                                                                                                                                                                                                                                                                                                                  |  |      |                               |            |                      |     |        |                      |      |      |  |  |        |                      |     |        |                      |      |      |  |  |         |                 |      |        |                 |      |
| <br>                                                                        |                                          |                                                                                                                                                                                                                                                                                                      |                                                                                                                                                                                                                                                                                                         |                                                                                                                                                                                                                                                                                                                             |                                                                                                                                                                                                                                                                                                                                                                                                                                                                                                                                  |                                                                                                                                                                                                                                                                                                                                                                                                                                                                                                                                                                                                                                                                                                                                                                                                                                                                                                                                                                                                                                                                                                                  |  |      |                               |            |                      |     |        |                      |      |      |  |  |        |                      |     |        |                      |      |      |  |  |         |                 |      |        |                 |      |
| Moderna                                                                     | NE (3.32 to NE)                          | 12.7                                                                                                                                                                                                                                                                                                 |                                                                                                                                                                                                                                                                                                         |                                                                                                                                                                                                                                                                                                                             |                                                                                                                                                                                                                                                                                                                                                                                                                                                                                                                                  |                                                                                                                                                                                                                                                                                                                                                                                                                                                                                                                                                                                                                                                                                                                                                                                                                                                                                                                                                                                                                                                                                                                  |  |      |                               |            |                      |     |        |                      |      |      |  |  |        |                      |     |        |                      |      |      |  |  |         |                 |      |        |                 |      |
| Dose 2                                                                      | NE (3.79 to NE)                          | 19.8                                                                                                                                                                                                                                                                                                 |                                                                                                                                                                                                                                                                                                         |                                                                                                                                                                                                                                                                                                                             |                                                                                                                                                                                                                                                                                                                                                                                                                                                                                                                                  |                                                                                                                                                                                                                                                                                                                                                                                                                                                                                                                                                                                                                                                                                                                                                                                                                                                                                                                                                                                                                                                                                                                  |  |      |                               |            |                      |     |        |                      |      |      |  |  |        |                      |     |        |                      |      |      |  |  |         |                 |      |        |                 |      |
| VSD† Jun 26<br><br>Dec 14 2020 to Jun 26 2021<br><br>USA<br><br>Klein 2021c | Pfizer-BioNTech (57% overall) or Moderna | <p>10,162,227 doses to 6.2 million vaccine-eligible members (≥12 y) (60.7% received at least 1 dose)</p> <p>Females 52.4%<br/>Mean age 49 y; 5.5% 12-15 y; 2.8% 16-17 y; 50.4% 18-49 y<br/>White non-Hispanic 40.6%</p> <p>Excluded from analysis if COVID-19 diagnosis ≤30 d before vaccination</p> | <ol style="list-style-type: none"> <li>Vaccinated in previous 0-21 d</li> <li>Concurrent previous vaccinees (22 to 42 d previously for similar individuals after vaccine dose 1 or 2 [most dose 2])</li> <li>Unvaccinated concurrent comparators (same day)</li> </ol> <p>Interval between doses NR</p> | <p>Myocarditis/pericarditis/ myopericarditis (combined)</p> <p>Risk interval: 0-21 d and 0-7 d</p> <p>ICD-10 using inclusion and exclusionary codes via clinical expert consultation; cases among 12-39 y confirmed by medical record review</p> <p>ED and in-patient records used</p> <p>Blinding to vaccine status NR</p> | <p>Weekly, rapid cycle analysis</p> <p>Incidence after any dose, after dose 1 and after dose 2</p> <p>Incident rate ratio (IRR) estimated by Poisson regression adjusted for age, sex, race and ethnicity, health plan, and calendar day; 1-sided P &lt; .0048 for statistical signal</p> <p>Excess risk/incidence per million doses (IR – [IR/IRR])</p> <p><u>Exploratory analyses</u> (no prespecified level of significance): by dose and vaccine type; for 12-39 y by dose, vaccine type and with shorter risk intervals</p> | <p><b>Group 1 vs. 2</b><br/>Events: 87 vs 39 events<br/>Incidence: 131.1 vs. 106.9 per million person-years<br/>aIRR: 1.18 (95% CI, 0.79 to 1.79)<br/>Excess risk/cases per million doses: 1.2 (95% CI, –2.1 to 3.3)</p> <p><u>Exploratory analyses:</u></p> <p><i>By dose and vaccine type: p &gt; 0.0048 for all</i></p> <p>12-39y:<br/>34 cases (53% 12-24y; 85% male; 82% hospitalized; 71% after dose 2; 7 myocarditis; 6 pericarditis; 21 myopericarditis)<br/>Clustering at 0-5 d after vaccine (p&lt;.001)<br/>During 0-21 d after vaccination (either dose):<br/>Incidence: 141.2 vs. 35.0 cases per million person-years<br/>aIRR: 3.74 (95% CI, 1.38 to 12.84)<br/>Similar results for each dose but most precise for dose 2 having more data</p> <p>During 0-7 d after vaccination (either dose):<br/>Incidences: 321 vs 35 cases per million person-years<br/>aIRR: 9.83 (95% CI, 3.35 to 35.77)<br/>Excess risk per million doses: 6.3 (95% CI, 4.9 to 6.8)<br/>Similar results for each dose but most precise for dose 2 having more data</p> <p>Similar findings in analyses by vaccine type</p> |  |      |                               |            |                      |     |        |                      |      |      |  |  |        |                      |     |        |                      |      |      |  |  |         |                 |      |        |                 |      |



| Dataset Dates Country                                                            | Vaccines Studied                                                      | Sample Size; Demographics; Previous Covid-19 diagnoses                                                                                                             | Study Group(s)                                                                                                              | Outcome(s); Risk Interval; Case Ascertainment                                                                                                                                                                                                                                | Analysis                                                                                                                                                                                                                                                                | Results                                                                                                                                                                                                                                                                                                                                                                                                                  |
|----------------------------------------------------------------------------------|-----------------------------------------------------------------------|--------------------------------------------------------------------------------------------------------------------------------------------------------------------|-----------------------------------------------------------------------------------------------------------------------------|------------------------------------------------------------------------------------------------------------------------------------------------------------------------------------------------------------------------------------------------------------------------------|-------------------------------------------------------------------------------------------------------------------------------------------------------------------------------------------------------------------------------------------------------------------------|--------------------------------------------------------------------------------------------------------------------------------------------------------------------------------------------------------------------------------------------------------------------------------------------------------------------------------------------------------------------------------------------------------------------------|
|                                                                                  |                                                                       |                                                                                                                                                                    |                                                                                                                             |                                                                                                                                                                                                                                                                              |                                                                                                                                                                                                                                                                         | <b>Group 1 vs 3:</b><br>Events: 87 vs. 293<br>Incidence 132 vs. 83 cases per million person-years<br>aIRR: 1.39 (95% CI, 1.05 to 1.82)                                                                                                                                                                                                                                                                                   |
| US Military Apr 30<br><br>Jan 1 to Apr 30 2021<br><br>USA<br><br>Montgomery 2021 | Pfizer-BioNTech or Moderna                                            | 2,810,00 doses (38% dose 2)<br><br>Males 100%<br>Median age 25 (20-51)<br><br>Tested cases for Covid-19 n=0 but all cases after dose 2 (n=3) had previous Covid-19 | 1. Vaccinated<br>2. Expected numbers within 30 d after vaccination                                                          | Myocarditis<br><br>Cases identified via referrals to Defense Health Agency clinical specialists and through review of VAERS reports; each case adjudicated using CDC definition for probable<br><br>Risk interval: all presented within 4 d                                  | Incidence in vaccinated<br><br>Observed vs expected cases: expected number based on an expected annual incidence ranging from 1-10 per 100 000 person-years (US) to 22 per 100 000 person-years (internationally); presenting within a 30-day period after vaccination. | Events: 23 (20 after dose 2)<br><br>Observed vs expected:<br>Total doses: 23 v vs 2 to 52<br>Dose 2: 20 vs 1 to 20<br>Dose 2 to military members: 19 vs 0 to 10<br>Dose 2 to male military members: 19 vs 0 to 8<br><br>Incidence:<br>Total doses: 0.8 per 100,000 doses<br>Dose 2: 1.9 per 100,000 doses<br>Dose 2 to military members: 3.5 per 100,000 doses<br>Dose 2 to male military members: 4.4 per 100,000 doses |
| Providence Health May 25<br><br>Up to May 25 2021<br><br>USA<br><br>Diaz 2021    | Pfizer, Moderna, Janssen<br><br>At least one dose (23.5% more than 1) | N=2,000,287<br><br>Female 58.9%<br>Median age 57 y (IQR 40-70)                                                                                                     | 1. Individuals vaccinated with at least 1 dose<br>2. Unvaccinated individuals Jan 19 – Jan21                                | Myocarditis, Pericarditis w/o myocarditis<br><br>Emergency department or inpatient encounters with diagnoses of myocarditis/myopericarditis, or pericarditis<br><br>Patients with previous diagnoses (cardiac, immunological, infectious) excluded<br><br>Risk interval: 30d | Change/excess in incidence between periods                                                                                                                                                                                                                              | Excess incidence of myocarditis/myopericarditis: 1.0 (0.61-1.54) per 100,000 vaccinees<br>Excess incidence of pericarditis: 1.8 (1.30-2.55) per 100,000 vaccinees                                                                                                                                                                                                                                                        |
| KPSC Jul 20<br><br>Dec 14 2021 to Jul 20 2021<br><br>USA<br><br>Simone 2021      | BNT162b2 (Pfizer) or mRNA-1273 (Moderna) (93.5% fully vaccinated)     | KPSC members ≥18y<br>Vaccinated group n=2,392,924<br><br>Median age 49y (IQR: 34-64y)<br>Age <40 y: 35.7%<br><br>Females 54.0%                                     | 1. Vaccinated<br>2. Concurrent unvaccinated<br>3. Vaccinated individuals during a 10-day period 1 year prior to vaccination | Myocarditis<br><br>Reports from clinicians to the KPSC Regional Immunization Practice Committee and by identifying hospitalization within 10 days of vaccine administration with a                                                                                           | Incidence rates and 95% confidence intervals (CIs)<br><br>IRR 1 vs 2, 1 vs 3                                                                                                                                                                                            | Observed incidence:<br>Dose 1: 0.8 (0.2-3.3) cases per 1 million first doses<br>Dose 2: 5.8 (3.4-10) cases per 1 million second doses<br>Unvaccinated: 2.2 (1.7-2.7) cases per million people<br><br>100% cases men<br><br>IRR (95% CI): 1 v 2<br>Dose 1: 0.38 (0.05-1.40)<br>Dose 2: 2.7 (1.4-4.8)                                                                                                                      |

| Dataset Dates Country                                                                       | Vaccines Studied                                      | Sample Size; Demographics; Previous Covid-19 diagnoses                                                                                                                                                                                                                                                                       | Study Group(s)                                                                                                                                                                                         | Outcome(s); Risk Interval; Case Ascertainment                                                                                                                                                                                                                                                                                           | Analysis                                                                                                                                                                                                                                                                                                                                            | Results                                                                                                                                                                                                                                                                                                                                                                                                                                                                                                                                                                                                                                                                                                                                                                                                                                                                                                                      |
|---------------------------------------------------------------------------------------------|-------------------------------------------------------|------------------------------------------------------------------------------------------------------------------------------------------------------------------------------------------------------------------------------------------------------------------------------------------------------------------------------|--------------------------------------------------------------------------------------------------------------------------------------------------------------------------------------------------------|-----------------------------------------------------------------------------------------------------------------------------------------------------------------------------------------------------------------------------------------------------------------------------------------------------------------------------------------|-----------------------------------------------------------------------------------------------------------------------------------------------------------------------------------------------------------------------------------------------------------------------------------------------------------------------------------------------------|------------------------------------------------------------------------------------------------------------------------------------------------------------------------------------------------------------------------------------------------------------------------------------------------------------------------------------------------------------------------------------------------------------------------------------------------------------------------------------------------------------------------------------------------------------------------------------------------------------------------------------------------------------------------------------------------------------------------------------------------------------------------------------------------------------------------------------------------------------------------------------------------------------------------------|
|                                                                                             |                                                       | Black 6.7%; Hispanic 37.8%; Asian 14.3%<br><br>Unvaccinated group: n=1 577 741, median (IQR) age was 39 (28-53) years<br>Age <40y: 53.7%<br><br>Females: 49.1% Black 8.8%; Hispanic 39.2%; Asian 6.6%                                                                                                                        |                                                                                                                                                                                                        | discharge diagnosis of myocarditis<br><br>All cases were independently adjudicated by at least 2 cardiologists.<br><br>Risk interval: 10d                                                                                                                                                                                               |                                                                                                                                                                                                                                                                                                                                                     | IRR 1 v 3<br>Dose 1: 1.0 (0.1-13.8)<br>Dose 2: 3.3 (1.0-13.7)                                                                                                                                                                                                                                                                                                                                                                                                                                                                                                                                                                                                                                                                                                                                                                                                                                                                |
| Israel MOH*<br>May 31<br><br>Dec 20 2020 to May 31 2021<br><br>Israel<br><br>Mevorach, 2021 | Pfizer-BioNTech<br><br>2 doses to 5.12 million people | Surveillance population 9,289,765 Israeli residents ≥16 y<br><br>29 of 98 cases in unvaccinated population had confirmed Covid-19 (timing NR); NR for vaccinated<br><br>Age, sex, race/ethnicity NR<br><br>None of the post-vaccination cases had concurrent Covid-19 via symptoms or PCR; 35/39 had negative serology tests | 1. Received dose 1 (n=5,442,696)<br>2. Received dose 2 (n=5,125,635)<br>3. Concurrent unvaccinated persons matched by date<br>4. Historical controls from 2017-2019<br><br>Interval between doses 21 d | Myocarditis/myopericarditis<br><br>ICD-9 codes 422.0-9x and 429.0x; cases 12-29 yrs old confirmed by medical record review using Brighton Criteria via consensus<br><br>Assessors not blinded to vaccine status<br><br>Cases of pericarditis without myocarditis were excluded<br><br>Risk interval: 21 d for dose 1 and 30d for dose 2 | Incidence in groups 1 and 2 (cumulative risks)<br>Risk difference (incidence) between 1 vs 2<br>Standardized incidence ratio of observed-to-expected (historical controls)<br>Attributable risk to dose 2<br>IRR group 2 vs 3 (weighted by age and sex)<br><br>Subgroups: sex, 5-yr age categories <30; 10 yr after 30; shorter risk interval 0-7 d | Total events in groups 1 and 2: 142 (136 definitive or probable [117 after dose 2], used for analysis except for standardized IR); group 3: 101<br><br>Incidence: dose 1: 0.35 per 100,000 persons; dose 2: 2.28 per 100,000 persons<br><br>Risk difference dose 2 – dose 1: 1.76 per 100,000 persons (95% CI, 1.33 to 2.19)<br><br>Standardized incidence ratio: group 1 vs 4 1.42 (95% CI, 0.92 to 2.10); group 2 vs 4: 5.34 (95% CI, 4.48 to 6.40)<br><br>aIRR group 2 vs 3: 2.35 (95% CI, 1.10 to 5.02)<br><br><u>Subgroup analyses</u><br>Males vs females:<br>Incidence:<br>dose 1: 0.64 vs 0.07 per 100,000 persons<br>dose 2: 3.83 vs. 0.46 per 100,000 persons<br>Risk difference dose 2 – dose 1: 3.19 (95% CI, 2.37 to 4.02) vs. 0.39 (95% CI, 0.10 to 0.68)<br>IRR: NR<br><br>By age categories:<br>Males<br>Dose 1 incidence per 100,000 persons<br>16-19 y 1.34<br>20-24 y 1.91<br>25-29y 1.22<br>30-39 y 0.41 |

| Dataset Dates Country                                                                                                                                                       | Vaccines Studied                                                                                               | Sample Size; Demographics; Previous Covid-19 diagnoses                                                                                                                                                                                                                                     | Study Group(s)                                                                                                         | Outcome(s); Risk Interval; Case Ascertainment                                                                                                                                                                                                                                                                                                                             | Analysis                                                                                                                                                             | Results                                                                                                                                                                                                                                                                                                                                                                                                                                                                                                                                                                                                                                                                                                                                                                                                                                                                                                                                                                                                                                               |
|-----------------------------------------------------------------------------------------------------------------------------------------------------------------------------|----------------------------------------------------------------------------------------------------------------|--------------------------------------------------------------------------------------------------------------------------------------------------------------------------------------------------------------------------------------------------------------------------------------------|------------------------------------------------------------------------------------------------------------------------|---------------------------------------------------------------------------------------------------------------------------------------------------------------------------------------------------------------------------------------------------------------------------------------------------------------------------------------------------------------------------|----------------------------------------------------------------------------------------------------------------------------------------------------------------------|-------------------------------------------------------------------------------------------------------------------------------------------------------------------------------------------------------------------------------------------------------------------------------------------------------------------------------------------------------------------------------------------------------------------------------------------------------------------------------------------------------------------------------------------------------------------------------------------------------------------------------------------------------------------------------------------------------------------------------------------------------------------------------------------------------------------------------------------------------------------------------------------------------------------------------------------------------------------------------------------------------------------------------------------------------|
|                                                                                                                                                                             |                                                                                                                |                                                                                                                                                                                                                                                                                            |                                                                                                                        |                                                                                                                                                                                                                                                                                                                                                                           |                                                                                                                                                                      | <p>40-49y 0.65<br/>           ≥50y 0.10<br/>           Dose 2 incidence<br/>           16-19 y 15.07<br/>           20-24 y 10.86<br/>           25-29 y 6.99<br/>           30-39 y 3.69<br/>           40-49 y 1.15<br/>           ≥50 y 0.21<br/>           aIRR 16-19 y 8.96 (95% CI, 4.50 to 17.83); 20-24 y 6.13 (95% CI 3.16 to 11.88); 25-29 y 3.58 (95% CI 1.82 to 7.01); ≥30 y 1.00 (95% CI, 0.61 to 1.64)</p> <p>Females<br/>           Dose 1 incidence<br/>           16-39 y 0<br/>           40-49 y 0.21<br/>           ≥50 y 0.09<br/>           Dose 2 incidence<br/>           16-19 y 1.00<br/>           20-24 y 2.16<br/>           25-29 y 0<br/>           30-39 y 0.22<br/>           40-49 y 0.45<br/>           ≥50 y 0.19<br/>           IRR 20-24 y 7.56 (95 CI, 1.47 to 8.96); others imprecise</p> <p>Shorter risk interval (7 d after dose 2):<br/>           Males 16-19 y:<br/>           Risk difference: 13.62 per 100,000 persons (95% CI, 8.31 to 19.03)<br/>           IRR: 31.90 (95% CI, 15.88 to 64.08)</p> |
| <p>Clalit Health**<br/>           May 24a<br/> <br/>           Dec 20 2020 to<br/>           May 24 2021<br/> <br/>           Israel<br/> <br/>           Witberg, 2021</p> | <p>Pfizer-<br/>           BioNTech<br/> <br/>           94%<br/>           received 2<br/>           doses</p> | <p>2,558,421 ≥16 y<br/>           receiving at least 1 dose<br/>           (94% 2 doses)<br/> <br/>           2 cases had Covid-19<br/>           (125 and 186 d) prior to<br/>           vaccine but NR if any<br/>           others and NR if active<br/>           testing of cases</p> | <p>1. Received 1 dose<br/>           (n=2,558,421)<br/> <br/>           Interval between doses 21<br/>           d</p> | <p>Myocarditis<br/> <br/>           Risk interval: 42 d after<br/>           dose 1<br/> <br/>           ICD-9 (codes 422, 429.0,<br/>           398.0, and 391.2 and their<br/>           respective subcodes), with<br/>           adjudication by<br/>           cardiologists using medical<br/>           and CDC case definition,<br/>           with consensus</p> | <p>Incidence after dose 1 or<br/>           2 using Kaplan–Meier<br/>           analysis<br/> <br/>           Subgroups: Sex; Ages<br/>           16-29 y; ≥30 y</p> | <p>Events: 54 (of 159 potential cases; 37 after dose 2; with 17/37 &gt;7 days post dose 2)<br/> <br/>           Incidence: 2.13 cases per 100,000 persons (95% CI: 1.56 to 2.70)<br/> <br/> <u>Subgroup analysis</u><br/>           Males vs females:<br/>           Incidence: 4.12 (95% CI: 2.99 to 5.26) vs. 0.23 (95% CI: 0 to 0.49)<br/> <br/> <u>By age categories:</u><br/>           Overall 16-29 y: 5.49 per 100,000 persons (95% CI: 3.59 to 7.39)<br/>           Overall ≥30 y: 1.13 per 100,000 persons (95% CI: 0.66 to 1.60)<br/>           Males 16-29 y: 10.69 per 100,000 persons (95% CI: 6.93 to 14.46)</p>                                                                                                                                                                                                                                                                                                                                                                                                                       |

| Dataset Dates Country                                                                                  | Vaccines Studied                                                    | Sample Size; Demographics; Previous Covid-19 diagnoses                                                                                                                                                                                                | Study Group(s)                                                                                                                                                                                                                                                                                                    | Outcome(s); Risk Interval; Case Ascertainment                                                                                                                                                                                      | Analysis                                                                                                                                                                                    | Results                                                                                                                                                                                                                                                                                                                                                                            |
|--------------------------------------------------------------------------------------------------------|---------------------------------------------------------------------|-------------------------------------------------------------------------------------------------------------------------------------------------------------------------------------------------------------------------------------------------------|-------------------------------------------------------------------------------------------------------------------------------------------------------------------------------------------------------------------------------------------------------------------------------------------------------------------|------------------------------------------------------------------------------------------------------------------------------------------------------------------------------------------------------------------------------------|---------------------------------------------------------------------------------------------------------------------------------------------------------------------------------------------|------------------------------------------------------------------------------------------------------------------------------------------------------------------------------------------------------------------------------------------------------------------------------------------------------------------------------------------------------------------------------------|
|                                                                                                        |                                                                     |                                                                                                                                                                                                                                                       |                                                                                                                                                                                                                                                                                                                   | Unblinded to vaccine status (all vaccinated and author adjudicating)                                                                                                                                                               |                                                                                                                                                                                             | Males $\geq 30$ y: 2.11 per 100,000 persons (95% CI, 1.19 to 3.04)<br>Females 16-29 y: 0.34 per 100,000 persons (95% CI, 0 to 1)<br>Females $\geq 30$ y: 0.20 per 100,000 persons (95% CI, 0 to 0.48)                                                                                                                                                                              |
| Clalit Health**<br>May 24b<br><br>Dec 20 2020 to May 24 2021<br><br>Israel<br><br>Barda, 2021          | Pfizer-BioNTech<br><br>NR how may had 1 vs 2 doses                  | Surveillance population 1,877,624 $\geq 16$ y<br><br>Excluded people with previous events, residing in nursing homes, healthcare workers, no BMI or residential area data<br><br>Mean age 38 y<br>Females 48%<br><br>Previous Covid-19 cases excluded | 1. Received 1 dose (n=884,828)<br>2. Concurrent unvaccinated, matched 1:1 by age, sex, place of residence, socioeconomic status, population sector (general Jewish, Arab, or ultra-Orthodox Jewish), number of preexisting conditions at risk for severe Covid-19. (n=884,828)<br><br>Interval between doses 21 d | Myocarditis & pericarditis after at least 1 dose<br><br>Risk interval: 42 d after dose 1<br><br>ICD-9 codes (422, 429.0, 398.0, 391.2, 420) after the index date<br><br>Blinding NR                                                | Incidence using Kaplan-Meier estimator<br><br>Risk difference<br>Risk Ratio                                                                                                                 | Events in group 1 vs 2: myocarditis 21 (91% male; median age 25y [IQR 20-34]) vs 6; pericarditis: 27 vs 18<br><br>Risk difference (all ages): myocarditis: 2.7 events per 100,000 persons (95% CI, 1.0 to 4.6); pericarditis: 1.0 events per 100,000 persons (95% CI, -1.6 to 3.4)<br><br>RR: myocarditis: 3.24 (95% CI, 1.55 to 12.44); pericarditis: 1.27 (95% CI, 0.68 to 2.31) |
| Israeli Defense Forces May 7<br><br>Dec 28 2020 to Mar 7 2021<br><br>Israel<br><br>Levin, 2021         | Pfizer-BioNTech<br><br>138,000 military personnel receiving 2 doses | 138,000<br><br>NR<br><br>NR                                                                                                                                                                                                                           | 1. Vaccinated with 2 doses (n=138,000)<br><br>Interval between doses NR                                                                                                                                                                                                                                           | Myocarditis<br><br>Medical record review, requiring ECG, echocardiography, or MRI findings<br><br>Risk interval: 7 d after dose 2<br><br>Not blinded                                                                               | Crude cumulative incidence                                                                                                                                                                  | Events: 7 confirmed in risk interval (100% male; Age 18-24)<br><br>Incidence: 5.07 per 100,000 people                                                                                                                                                                                                                                                                              |
| Genesis Healthcare***<br>Feb 14<br><br>Dec 18 2020 to Feb 14 2021<br><br>USA<br><br>Bardenheier, 2021a | Moderna or Pfizer-BioNTech<br><br>All had 1 dose                    | 20,918 nursing home residents<br><br>Females 61.9%<br><65 y 18.5%<br>African American or Latinx 16.9%<br><br>Excluded if Covid-19 +ve within 20 d of vaccination, or treated                                                                          | 1. No prior infection at vaccination (n=13,163)<br>2. Symptomatic infection >20 days before vaccination (n=5,617)<br>3. Asymptomatic infection >20 days before vaccination (n=2,138)<br>4. Unvaccinated (from Bardenheier, 2021b)<br><br>Interval between doses NA                                                | Myocarditis/pericarditis<br><br>Risk interval: 15 days after dose 1<br><br>Active, prospective surveillance; medical record review for ICD-10-CM codes, confirmed by physician chart review, using Brighton Collaboration Criteria | Incidence (if events)<br><br>Comparisons between groups by multilevel logistic regression that adjusted for clustering and applied propensity scoring for age, sex, pre-existing conditions | Events: group 1 vs 2 vs 3: 0 vs. 0 vs. 0                                                                                                                                                                                                                                                                                                                                           |

| Dataset<br>Dates<br>Country                                                                                   | Vaccines<br>Studied                                                                                 | Sample Size;<br>Demographics;<br>Previous Covid-19<br>diagnoses                                                                                                                                                                                                           | Study Group(s)                                                                                                                  | Outcome(s); Risk<br>Interval; Case<br>Ascertainment                                                                                                                                                          | Analysis                                                                   | Results               |
|---------------------------------------------------------------------------------------------------------------|-----------------------------------------------------------------------------------------------------|---------------------------------------------------------------------------------------------------------------------------------------------------------------------------------------------------------------------------------------------------------------------------|---------------------------------------------------------------------------------------------------------------------------------|--------------------------------------------------------------------------------------------------------------------------------------------------------------------------------------------------------------|----------------------------------------------------------------------------|-----------------------|
|                                                                                                               |                                                                                                     | with SARS-CoV-2<br>monoclonal antibodies<br>within 90 days before<br>vaccination                                                                                                                                                                                          |                                                                                                                                 | Blinding NR                                                                                                                                                                                                  |                                                                            |                       |
| Genesis<br>Healthcare***<br>Jan 3<br><br>Dec 18 2020 to<br>Jan 3 2021<br><br>USA<br><br>Bardenheier,<br>2021b | Moderna or<br>Pfizer-<br>BioNTech<br>(70.6%)<br><br>1 <sup>st</sup> dose or<br>2 <sup>nd</sup> dose | 21,222 nursing home<br>residents<br><br>Females 61.9%<br><65 y 18.8<br>African American or<br>Latinx 18%<br><br>Excluded if Covid-19<br>+ve within 20 d of<br>vaccination, or treated<br>with SARS-CoV-2<br>monoclonal antibodies<br>within 90 days before<br>vaccination | 1. After dose 1 (n=8553)<br>2. After dose 2 (n=8371)<br>3. Unvaccinated (n=11072)<br><br>Interval between doses 3<br>to 6 weeks | Myocarditis<br><br>Active, prospective<br>surveillance; medical<br>record review for ICD-10<br>codes, confirmed by<br>physician chart review,<br>using Brighton<br>Collaboration Criteria<br><br>Blinding NR | Incidence<br><br>IRR, adjusted for age,<br>sex, pre-existing<br>conditions | Events: 0 vs. 0 vs. 0 |

**Table A2. Study characteristics of observational studies using data from passive surveillance systems (question 1)**

| Dataset<br>Dates of data<br>Country of Data                      | Vaccines Studied                        | Outcome(s); Case Ascertainment & Risk Interval                                                                                                                                                                                                   | Analysis                                                                    | Results                                                                                                                                                                                                                                                                                                                                                                                                                                                                                                                                                                                                                                                                                                                                                                                                                                                                                                                                                                                                                                                                                                                                                                                                                                                                                                                                                                                                                                                                                                                                                                                                                                                                                                                                                                                                                                                                                                                                                                                                                                                                                                                                                                                                                                                                                                                                                                                                                                                                                                                                                                                                                                                                                                                                                                                                                                                                                                                                                                                                                                                                                                                                                                                                                                                                                                                                                                                                                                                                                                                                                                                               |      |        |  |         |  |        |        |        |        |       |             |             |     |                |       |            |             |     |                |       |     |             |            |             |       |     |            |     |             |       |     |            |     |            |       |     |     |     |            |       |     |     |     |     |     |     |     |     |     |      |        |        |        |        |       |            |             |     |                |       |            |             |     |                |       |            |             |            |             |       |     |             |            |             |       |     |            |            |            |       |     |     |     |            |       |     |     |     |     |     |     |     |     |     |      |        |        |        |        |       |     |            |     |     |       |     |            |     |     |       |     |            |     |            |       |     |     |     |            |       |     |     |     |     |       |     |     |     |     |       |     |     |     |     |     |     |     |     |     |
|------------------------------------------------------------------|-----------------------------------------|--------------------------------------------------------------------------------------------------------------------------------------------------------------------------------------------------------------------------------------------------|-----------------------------------------------------------------------------|-------------------------------------------------------------------------------------------------------------------------------------------------------------------------------------------------------------------------------------------------------------------------------------------------------------------------------------------------------------------------------------------------------------------------------------------------------------------------------------------------------------------------------------------------------------------------------------------------------------------------------------------------------------------------------------------------------------------------------------------------------------------------------------------------------------------------------------------------------------------------------------------------------------------------------------------------------------------------------------------------------------------------------------------------------------------------------------------------------------------------------------------------------------------------------------------------------------------------------------------------------------------------------------------------------------------------------------------------------------------------------------------------------------------------------------------------------------------------------------------------------------------------------------------------------------------------------------------------------------------------------------------------------------------------------------------------------------------------------------------------------------------------------------------------------------------------------------------------------------------------------------------------------------------------------------------------------------------------------------------------------------------------------------------------------------------------------------------------------------------------------------------------------------------------------------------------------------------------------------------------------------------------------------------------------------------------------------------------------------------------------------------------------------------------------------------------------------------------------------------------------------------------------------------------------------------------------------------------------------------------------------------------------------------------------------------------------------------------------------------------------------------------------------------------------------------------------------------------------------------------------------------------------------------------------------------------------------------------------------------------------------------------------------------------------------------------------------------------------------------------------------------------------------------------------------------------------------------------------------------------------------------------------------------------------------------------------------------------------------------------------------------------------------------------------------------------------------------------------------------------------------------------------------------------------------------------------------------------------|------|--------|--|---------|--|--------|--------|--------|--------|-------|-------------|-------------|-----|----------------|-------|------------|-------------|-----|----------------|-------|-----|-------------|------------|-------------|-------|-----|------------|-----|-------------|-------|-----|------------|-----|------------|-------|-----|-----|-----|------------|-------|-----|-----|-----|-----|-----|-----|-----|-----|-----|------|--------|--------|--------|--------|-------|------------|-------------|-----|----------------|-------|------------|-------------|-----|----------------|-------|------------|-------------|------------|-------------|-------|-----|-------------|------------|-------------|-------|-----|------------|------------|------------|-------|-----|-----|-----|------------|-------|-----|-----|-----|-----|-----|-----|-----|-----|-----|------|--------|--------|--------|--------|-------|-----|------------|-----|-----|-------|-----|------------|-----|-----|-------|-----|------------|-----|------------|-------|-----|-----|-----|------------|-------|-----|-----|-----|-----|-------|-----|-----|-----|-----|-------|-----|-----|-----|-----|-----|-----|-----|-----|-----|
| VAERS* Oct 6<br><br>Up to Oct 6, 2021<br><br>USA<br><br>Su, 2021 | Pfizer-BioNTech,<br>Moderna and Janssen | Myopericarditis (myocarditis +/- pericarditis); pericarditis<br><br>Screening via 30 MedDRA terms and ICD-10; all analyzed reports verified to meet CDC case definition by provider interview or medical record review<br><br>Risk interval: 7 d | Crude reporting rates of confirmed cases of myopericarditis after each dose | Total events: 2,459 myopericarditis (1,181 have been verified and 935 occurred in 0-6 d after vaccination; 877 pericarditis (366,062,239 doses of mRNA vaccines)<br><br>For myopericarditis: 67% Pfizer; 29% Moderna; 76% after dose 2 (50 preliminary reports after Janssen not in analysis)<br><br><u>Reporting rates of myopericarditis per 1 million doses administered (N=935 verified cases):</u><br><br><table border="1"> <thead> <tr> <th rowspan="2">Ages</th> <th colspan="2">Pfizer</th> <th colspan="2">Moderna</th> </tr> <tr> <th>Dose 1</th> <th>Dose 2</th> <th>Dose 1</th> <th>Dose 2</th> </tr> </thead> <tbody> <tr> <td>12-15</td> <td><b>2.3*</b></td> <td><b>21.5</b></td> <td>0.0</td> <td>not calculated</td> </tr> <tr> <td>16-17</td> <td><b>2.8</b></td> <td><b>37.4</b></td> <td>0.0</td> <td>not calculated</td> </tr> <tr> <td>18-24</td> <td>1.2</td> <td><b>18.1</b></td> <td><b>3.1</b></td> <td><b>20.7</b></td> </tr> <tr> <td>25-29</td> <td>0.7</td> <td><b>5.7</b></td> <td>1.8</td> <td><b>11.2</b></td> </tr> <tr> <td>30-39</td> <td>0.6</td> <td><b>2.8</b></td> <td>1.4</td> <td><b>3.6</b></td> </tr> <tr> <td>40-49</td> <td>0.2</td> <td>1.5</td> <td>0.2</td> <td><b>2.1</b></td> </tr> <tr> <td>50-64</td> <td>0.3</td> <td>0.4</td> <td>0.5</td> <td>0.5</td> </tr> <tr> <td>65+</td> <td>0.1</td> <td>0.2</td> <td>0.0</td> <td>0.3</td> </tr> </tbody> </table><br><u>Males (N=797):</u><br><table border="1"> <thead> <tr> <th>Ages</th> <th>Dose 1</th> <th>Dose 2</th> <th>Dose 1</th> <th>Dose 2</th> </tr> </thead> <tbody> <tr> <td>12-15</td> <td><b>4.2</b></td> <td><b>39.9</b></td> <td>0.0</td> <td>not calculated</td> </tr> <tr> <td>16-17</td> <td><b>5.7</b></td> <td><b>69.1</b></td> <td>0.0</td> <td>not calculated</td> </tr> <tr> <td>18-24</td> <td><b>2.3</b></td> <td><b>36.8</b></td> <td><b>6.1</b></td> <td><b>38.5</b></td> </tr> <tr> <td>25-29</td> <td>1.3</td> <td><b>10.8</b></td> <td><b>3.4</b></td> <td><b>17.2</b></td> </tr> <tr> <td>30-39</td> <td>0.5</td> <td><b>5.2</b></td> <td><b>2.3</b></td> <td><b>6.7</b></td> </tr> <tr> <td>40-49</td> <td>0.3</td> <td>2.0</td> <td>0.2</td> <td><b>2.9</b></td> </tr> <tr> <td>50-64</td> <td>0.2</td> <td>0.3</td> <td>0.5</td> <td>0.6</td> </tr> <tr> <td>65+</td> <td>0.2</td> <td>0.1</td> <td>0.1</td> <td>0.3</td> </tr> </tbody> </table><br><u>Females (N=138):</u><br><table border="1"> <thead> <tr> <th>Ages</th> <th>Dose 1</th> <th>Dose 2</th> <th>Dose 1</th> <th>Dose 2</th> </tr> </thead> <tbody> <tr> <td>12-15</td> <td>0.4</td> <td><b>3.9</b></td> <td>0.0</td> <td>0.0</td> </tr> <tr> <td>16-17</td> <td>0.0</td> <td><b>7.9</b></td> <td>0.0</td> <td>0.0</td> </tr> <tr> <td>18-24</td> <td>0.2</td> <td><b>2.5</b></td> <td>0.6</td> <td><b>5.3</b></td> </tr> <tr> <td>25-29</td> <td>0.2</td> <td>1.2</td> <td>0.4</td> <td><b>5.7</b></td> </tr> <tr> <td>30-39</td> <td>0.6</td> <td>0.7</td> <td>0.5</td> <td>0.4</td> </tr> <tr> <td>40-49</td> <td>0.1</td> <td>1.1</td> <td>0.2</td> <td>1.4</td> </tr> <tr> <td>50-64</td> <td>0.3</td> <td>0.5</td> <td>0.5</td> <td>0.4</td> </tr> <tr> <td>65+</td> <td>0.1</td> <td>0.3</td> <td>0.0</td> <td>0.3</td> </tr> </tbody> </table><br>*Reporting rates exceed background incidence (bolded data above)<br>An estimated 1–10 cases of myocarditis per 100,000 person years occurs among people in the United States, regardless of vaccination status; adjusted for the 7-day risk period, this estimated background is 0.2 to 1.9 per 1 million person 7-day risk period | Ages | Pfizer |  | Moderna |  | Dose 1 | Dose 2 | Dose 1 | Dose 2 | 12-15 | <b>2.3*</b> | <b>21.5</b> | 0.0 | not calculated | 16-17 | <b>2.8</b> | <b>37.4</b> | 0.0 | not calculated | 18-24 | 1.2 | <b>18.1</b> | <b>3.1</b> | <b>20.7</b> | 25-29 | 0.7 | <b>5.7</b> | 1.8 | <b>11.2</b> | 30-39 | 0.6 | <b>2.8</b> | 1.4 | <b>3.6</b> | 40-49 | 0.2 | 1.5 | 0.2 | <b>2.1</b> | 50-64 | 0.3 | 0.4 | 0.5 | 0.5 | 65+ | 0.1 | 0.2 | 0.0 | 0.3 | Ages | Dose 1 | Dose 2 | Dose 1 | Dose 2 | 12-15 | <b>4.2</b> | <b>39.9</b> | 0.0 | not calculated | 16-17 | <b>5.7</b> | <b>69.1</b> | 0.0 | not calculated | 18-24 | <b>2.3</b> | <b>36.8</b> | <b>6.1</b> | <b>38.5</b> | 25-29 | 1.3 | <b>10.8</b> | <b>3.4</b> | <b>17.2</b> | 30-39 | 0.5 | <b>5.2</b> | <b>2.3</b> | <b>6.7</b> | 40-49 | 0.3 | 2.0 | 0.2 | <b>2.9</b> | 50-64 | 0.2 | 0.3 | 0.5 | 0.6 | 65+ | 0.2 | 0.1 | 0.1 | 0.3 | Ages | Dose 1 | Dose 2 | Dose 1 | Dose 2 | 12-15 | 0.4 | <b>3.9</b> | 0.0 | 0.0 | 16-17 | 0.0 | <b>7.9</b> | 0.0 | 0.0 | 18-24 | 0.2 | <b>2.5</b> | 0.6 | <b>5.3</b> | 25-29 | 0.2 | 1.2 | 0.4 | <b>5.7</b> | 30-39 | 0.6 | 0.7 | 0.5 | 0.4 | 40-49 | 0.1 | 1.1 | 0.2 | 1.4 | 50-64 | 0.3 | 0.5 | 0.5 | 0.4 | 65+ | 0.1 | 0.3 | 0.0 | 0.3 |
| Ages                                                             | Pfizer                                  |                                                                                                                                                                                                                                                  | Moderna                                                                     |                                                                                                                                                                                                                                                                                                                                                                                                                                                                                                                                                                                                                                                                                                                                                                                                                                                                                                                                                                                                                                                                                                                                                                                                                                                                                                                                                                                                                                                                                                                                                                                                                                                                                                                                                                                                                                                                                                                                                                                                                                                                                                                                                                                                                                                                                                                                                                                                                                                                                                                                                                                                                                                                                                                                                                                                                                                                                                                                                                                                                                                                                                                                                                                                                                                                                                                                                                                                                                                                                                                                                                                                       |      |        |  |         |  |        |        |        |        |       |             |             |     |                |       |            |             |     |                |       |     |             |            |             |       |     |            |     |             |       |     |            |     |            |       |     |     |     |            |       |     |     |     |     |     |     |     |     |     |      |        |        |        |        |       |            |             |     |                |       |            |             |     |                |       |            |             |            |             |       |     |             |            |             |       |     |            |            |            |       |     |     |     |            |       |     |     |     |     |     |     |     |     |     |      |        |        |        |        |       |     |            |     |     |       |     |            |     |     |       |     |            |     |            |       |     |     |     |            |       |     |     |     |     |       |     |     |     |     |       |     |     |     |     |     |     |     |     |     |
|                                                                  | Dose 1                                  | Dose 2                                                                                                                                                                                                                                           | Dose 1                                                                      | Dose 2                                                                                                                                                                                                                                                                                                                                                                                                                                                                                                                                                                                                                                                                                                                                                                                                                                                                                                                                                                                                                                                                                                                                                                                                                                                                                                                                                                                                                                                                                                                                                                                                                                                                                                                                                                                                                                                                                                                                                                                                                                                                                                                                                                                                                                                                                                                                                                                                                                                                                                                                                                                                                                                                                                                                                                                                                                                                                                                                                                                                                                                                                                                                                                                                                                                                                                                                                                                                                                                                                                                                                                                                |      |        |  |         |  |        |        |        |        |       |             |             |     |                |       |            |             |     |                |       |     |             |            |             |       |     |            |     |             |       |     |            |     |            |       |     |     |     |            |       |     |     |     |     |     |     |     |     |     |      |        |        |        |        |       |            |             |     |                |       |            |             |     |                |       |            |             |            |             |       |     |             |            |             |       |     |            |            |            |       |     |     |     |            |       |     |     |     |     |     |     |     |     |     |      |        |        |        |        |       |     |            |     |     |       |     |            |     |     |       |     |            |     |            |       |     |     |     |            |       |     |     |     |     |       |     |     |     |     |       |     |     |     |     |     |     |     |     |     |
| 12-15                                                            | <b>2.3*</b>                             | <b>21.5</b>                                                                                                                                                                                                                                      | 0.0                                                                         | not calculated                                                                                                                                                                                                                                                                                                                                                                                                                                                                                                                                                                                                                                                                                                                                                                                                                                                                                                                                                                                                                                                                                                                                                                                                                                                                                                                                                                                                                                                                                                                                                                                                                                                                                                                                                                                                                                                                                                                                                                                                                                                                                                                                                                                                                                                                                                                                                                                                                                                                                                                                                                                                                                                                                                                                                                                                                                                                                                                                                                                                                                                                                                                                                                                                                                                                                                                                                                                                                                                                                                                                                                                        |      |        |  |         |  |        |        |        |        |       |             |             |     |                |       |            |             |     |                |       |     |             |            |             |       |     |            |     |             |       |     |            |     |            |       |     |     |     |            |       |     |     |     |     |     |     |     |     |     |      |        |        |        |        |       |            |             |     |                |       |            |             |     |                |       |            |             |            |             |       |     |             |            |             |       |     |            |            |            |       |     |     |     |            |       |     |     |     |     |     |     |     |     |     |      |        |        |        |        |       |     |            |     |     |       |     |            |     |     |       |     |            |     |            |       |     |     |     |            |       |     |     |     |     |       |     |     |     |     |       |     |     |     |     |     |     |     |     |     |
| 16-17                                                            | <b>2.8</b>                              | <b>37.4</b>                                                                                                                                                                                                                                      | 0.0                                                                         | not calculated                                                                                                                                                                                                                                                                                                                                                                                                                                                                                                                                                                                                                                                                                                                                                                                                                                                                                                                                                                                                                                                                                                                                                                                                                                                                                                                                                                                                                                                                                                                                                                                                                                                                                                                                                                                                                                                                                                                                                                                                                                                                                                                                                                                                                                                                                                                                                                                                                                                                                                                                                                                                                                                                                                                                                                                                                                                                                                                                                                                                                                                                                                                                                                                                                                                                                                                                                                                                                                                                                                                                                                                        |      |        |  |         |  |        |        |        |        |       |             |             |     |                |       |            |             |     |                |       |     |             |            |             |       |     |            |     |             |       |     |            |     |            |       |     |     |     |            |       |     |     |     |     |     |     |     |     |     |      |        |        |        |        |       |            |             |     |                |       |            |             |     |                |       |            |             |            |             |       |     |             |            |             |       |     |            |            |            |       |     |     |     |            |       |     |     |     |     |     |     |     |     |     |      |        |        |        |        |       |     |            |     |     |       |     |            |     |     |       |     |            |     |            |       |     |     |     |            |       |     |     |     |     |       |     |     |     |     |       |     |     |     |     |     |     |     |     |     |
| 18-24                                                            | 1.2                                     | <b>18.1</b>                                                                                                                                                                                                                                      | <b>3.1</b>                                                                  | <b>20.7</b>                                                                                                                                                                                                                                                                                                                                                                                                                                                                                                                                                                                                                                                                                                                                                                                                                                                                                                                                                                                                                                                                                                                                                                                                                                                                                                                                                                                                                                                                                                                                                                                                                                                                                                                                                                                                                                                                                                                                                                                                                                                                                                                                                                                                                                                                                                                                                                                                                                                                                                                                                                                                                                                                                                                                                                                                                                                                                                                                                                                                                                                                                                                                                                                                                                                                                                                                                                                                                                                                                                                                                                                           |      |        |  |         |  |        |        |        |        |       |             |             |     |                |       |            |             |     |                |       |     |             |            |             |       |     |            |     |             |       |     |            |     |            |       |     |     |     |            |       |     |     |     |     |     |     |     |     |     |      |        |        |        |        |       |            |             |     |                |       |            |             |     |                |       |            |             |            |             |       |     |             |            |             |       |     |            |            |            |       |     |     |     |            |       |     |     |     |     |     |     |     |     |     |      |        |        |        |        |       |     |            |     |     |       |     |            |     |     |       |     |            |     |            |       |     |     |     |            |       |     |     |     |     |       |     |     |     |     |       |     |     |     |     |     |     |     |     |     |
| 25-29                                                            | 0.7                                     | <b>5.7</b>                                                                                                                                                                                                                                       | 1.8                                                                         | <b>11.2</b>                                                                                                                                                                                                                                                                                                                                                                                                                                                                                                                                                                                                                                                                                                                                                                                                                                                                                                                                                                                                                                                                                                                                                                                                                                                                                                                                                                                                                                                                                                                                                                                                                                                                                                                                                                                                                                                                                                                                                                                                                                                                                                                                                                                                                                                                                                                                                                                                                                                                                                                                                                                                                                                                                                                                                                                                                                                                                                                                                                                                                                                                                                                                                                                                                                                                                                                                                                                                                                                                                                                                                                                           |      |        |  |         |  |        |        |        |        |       |             |             |     |                |       |            |             |     |                |       |     |             |            |             |       |     |            |     |             |       |     |            |     |            |       |     |     |     |            |       |     |     |     |     |     |     |     |     |     |      |        |        |        |        |       |            |             |     |                |       |            |             |     |                |       |            |             |            |             |       |     |             |            |             |       |     |            |            |            |       |     |     |     |            |       |     |     |     |     |     |     |     |     |     |      |        |        |        |        |       |     |            |     |     |       |     |            |     |     |       |     |            |     |            |       |     |     |     |            |       |     |     |     |     |       |     |     |     |     |       |     |     |     |     |     |     |     |     |     |
| 30-39                                                            | 0.6                                     | <b>2.8</b>                                                                                                                                                                                                                                       | 1.4                                                                         | <b>3.6</b>                                                                                                                                                                                                                                                                                                                                                                                                                                                                                                                                                                                                                                                                                                                                                                                                                                                                                                                                                                                                                                                                                                                                                                                                                                                                                                                                                                                                                                                                                                                                                                                                                                                                                                                                                                                                                                                                                                                                                                                                                                                                                                                                                                                                                                                                                                                                                                                                                                                                                                                                                                                                                                                                                                                                                                                                                                                                                                                                                                                                                                                                                                                                                                                                                                                                                                                                                                                                                                                                                                                                                                                            |      |        |  |         |  |        |        |        |        |       |             |             |     |                |       |            |             |     |                |       |     |             |            |             |       |     |            |     |             |       |     |            |     |            |       |     |     |     |            |       |     |     |     |     |     |     |     |     |     |      |        |        |        |        |       |            |             |     |                |       |            |             |     |                |       |            |             |            |             |       |     |             |            |             |       |     |            |            |            |       |     |     |     |            |       |     |     |     |     |     |     |     |     |     |      |        |        |        |        |       |     |            |     |     |       |     |            |     |     |       |     |            |     |            |       |     |     |     |            |       |     |     |     |     |       |     |     |     |     |       |     |     |     |     |     |     |     |     |     |
| 40-49                                                            | 0.2                                     | 1.5                                                                                                                                                                                                                                              | 0.2                                                                         | <b>2.1</b>                                                                                                                                                                                                                                                                                                                                                                                                                                                                                                                                                                                                                                                                                                                                                                                                                                                                                                                                                                                                                                                                                                                                                                                                                                                                                                                                                                                                                                                                                                                                                                                                                                                                                                                                                                                                                                                                                                                                                                                                                                                                                                                                                                                                                                                                                                                                                                                                                                                                                                                                                                                                                                                                                                                                                                                                                                                                                                                                                                                                                                                                                                                                                                                                                                                                                                                                                                                                                                                                                                                                                                                            |      |        |  |         |  |        |        |        |        |       |             |             |     |                |       |            |             |     |                |       |     |             |            |             |       |     |            |     |             |       |     |            |     |            |       |     |     |     |            |       |     |     |     |     |     |     |     |     |     |      |        |        |        |        |       |            |             |     |                |       |            |             |     |                |       |            |             |            |             |       |     |             |            |             |       |     |            |            |            |       |     |     |     |            |       |     |     |     |     |     |     |     |     |     |      |        |        |        |        |       |     |            |     |     |       |     |            |     |     |       |     |            |     |            |       |     |     |     |            |       |     |     |     |     |       |     |     |     |     |       |     |     |     |     |     |     |     |     |     |
| 50-64                                                            | 0.3                                     | 0.4                                                                                                                                                                                                                                              | 0.5                                                                         | 0.5                                                                                                                                                                                                                                                                                                                                                                                                                                                                                                                                                                                                                                                                                                                                                                                                                                                                                                                                                                                                                                                                                                                                                                                                                                                                                                                                                                                                                                                                                                                                                                                                                                                                                                                                                                                                                                                                                                                                                                                                                                                                                                                                                                                                                                                                                                                                                                                                                                                                                                                                                                                                                                                                                                                                                                                                                                                                                                                                                                                                                                                                                                                                                                                                                                                                                                                                                                                                                                                                                                                                                                                                   |      |        |  |         |  |        |        |        |        |       |             |             |     |                |       |            |             |     |                |       |     |             |            |             |       |     |            |     |             |       |     |            |     |            |       |     |     |     |            |       |     |     |     |     |     |     |     |     |     |      |        |        |        |        |       |            |             |     |                |       |            |             |     |                |       |            |             |            |             |       |     |             |            |             |       |     |            |            |            |       |     |     |     |            |       |     |     |     |     |     |     |     |     |     |      |        |        |        |        |       |     |            |     |     |       |     |            |     |     |       |     |            |     |            |       |     |     |     |            |       |     |     |     |     |       |     |     |     |     |       |     |     |     |     |     |     |     |     |     |
| 65+                                                              | 0.1                                     | 0.2                                                                                                                                                                                                                                              | 0.0                                                                         | 0.3                                                                                                                                                                                                                                                                                                                                                                                                                                                                                                                                                                                                                                                                                                                                                                                                                                                                                                                                                                                                                                                                                                                                                                                                                                                                                                                                                                                                                                                                                                                                                                                                                                                                                                                                                                                                                                                                                                                                                                                                                                                                                                                                                                                                                                                                                                                                                                                                                                                                                                                                                                                                                                                                                                                                                                                                                                                                                                                                                                                                                                                                                                                                                                                                                                                                                                                                                                                                                                                                                                                                                                                                   |      |        |  |         |  |        |        |        |        |       |             |             |     |                |       |            |             |     |                |       |     |             |            |             |       |     |            |     |             |       |     |            |     |            |       |     |     |     |            |       |     |     |     |     |     |     |     |     |     |      |        |        |        |        |       |            |             |     |                |       |            |             |     |                |       |            |             |            |             |       |     |             |            |             |       |     |            |            |            |       |     |     |     |            |       |     |     |     |     |     |     |     |     |     |      |        |        |        |        |       |     |            |     |     |       |     |            |     |     |       |     |            |     |            |       |     |     |     |            |       |     |     |     |     |       |     |     |     |     |       |     |     |     |     |     |     |     |     |     |
| Ages                                                             | Dose 1                                  | Dose 2                                                                                                                                                                                                                                           | Dose 1                                                                      | Dose 2                                                                                                                                                                                                                                                                                                                                                                                                                                                                                                                                                                                                                                                                                                                                                                                                                                                                                                                                                                                                                                                                                                                                                                                                                                                                                                                                                                                                                                                                                                                                                                                                                                                                                                                                                                                                                                                                                                                                                                                                                                                                                                                                                                                                                                                                                                                                                                                                                                                                                                                                                                                                                                                                                                                                                                                                                                                                                                                                                                                                                                                                                                                                                                                                                                                                                                                                                                                                                                                                                                                                                                                                |      |        |  |         |  |        |        |        |        |       |             |             |     |                |       |            |             |     |                |       |     |             |            |             |       |     |            |     |             |       |     |            |     |            |       |     |     |     |            |       |     |     |     |     |     |     |     |     |     |      |        |        |        |        |       |            |             |     |                |       |            |             |     |                |       |            |             |            |             |       |     |             |            |             |       |     |            |            |            |       |     |     |     |            |       |     |     |     |     |     |     |     |     |     |      |        |        |        |        |       |     |            |     |     |       |     |            |     |     |       |     |            |     |            |       |     |     |     |            |       |     |     |     |     |       |     |     |     |     |       |     |     |     |     |     |     |     |     |     |
| 12-15                                                            | <b>4.2</b>                              | <b>39.9</b>                                                                                                                                                                                                                                      | 0.0                                                                         | not calculated                                                                                                                                                                                                                                                                                                                                                                                                                                                                                                                                                                                                                                                                                                                                                                                                                                                                                                                                                                                                                                                                                                                                                                                                                                                                                                                                                                                                                                                                                                                                                                                                                                                                                                                                                                                                                                                                                                                                                                                                                                                                                                                                                                                                                                                                                                                                                                                                                                                                                                                                                                                                                                                                                                                                                                                                                                                                                                                                                                                                                                                                                                                                                                                                                                                                                                                                                                                                                                                                                                                                                                                        |      |        |  |         |  |        |        |        |        |       |             |             |     |                |       |            |             |     |                |       |     |             |            |             |       |     |            |     |             |       |     |            |     |            |       |     |     |     |            |       |     |     |     |     |     |     |     |     |     |      |        |        |        |        |       |            |             |     |                |       |            |             |     |                |       |            |             |            |             |       |     |             |            |             |       |     |            |            |            |       |     |     |     |            |       |     |     |     |     |     |     |     |     |     |      |        |        |        |        |       |     |            |     |     |       |     |            |     |     |       |     |            |     |            |       |     |     |     |            |       |     |     |     |     |       |     |     |     |     |       |     |     |     |     |     |     |     |     |     |
| 16-17                                                            | <b>5.7</b>                              | <b>69.1</b>                                                                                                                                                                                                                                      | 0.0                                                                         | not calculated                                                                                                                                                                                                                                                                                                                                                                                                                                                                                                                                                                                                                                                                                                                                                                                                                                                                                                                                                                                                                                                                                                                                                                                                                                                                                                                                                                                                                                                                                                                                                                                                                                                                                                                                                                                                                                                                                                                                                                                                                                                                                                                                                                                                                                                                                                                                                                                                                                                                                                                                                                                                                                                                                                                                                                                                                                                                                                                                                                                                                                                                                                                                                                                                                                                                                                                                                                                                                                                                                                                                                                                        |      |        |  |         |  |        |        |        |        |       |             |             |     |                |       |            |             |     |                |       |     |             |            |             |       |     |            |     |             |       |     |            |     |            |       |     |     |     |            |       |     |     |     |     |     |     |     |     |     |      |        |        |        |        |       |            |             |     |                |       |            |             |     |                |       |            |             |            |             |       |     |             |            |             |       |     |            |            |            |       |     |     |     |            |       |     |     |     |     |     |     |     |     |     |      |        |        |        |        |       |     |            |     |     |       |     |            |     |     |       |     |            |     |            |       |     |     |     |            |       |     |     |     |     |       |     |     |     |     |       |     |     |     |     |     |     |     |     |     |
| 18-24                                                            | <b>2.3</b>                              | <b>36.8</b>                                                                                                                                                                                                                                      | <b>6.1</b>                                                                  | <b>38.5</b>                                                                                                                                                                                                                                                                                                                                                                                                                                                                                                                                                                                                                                                                                                                                                                                                                                                                                                                                                                                                                                                                                                                                                                                                                                                                                                                                                                                                                                                                                                                                                                                                                                                                                                                                                                                                                                                                                                                                                                                                                                                                                                                                                                                                                                                                                                                                                                                                                                                                                                                                                                                                                                                                                                                                                                                                                                                                                                                                                                                                                                                                                                                                                                                                                                                                                                                                                                                                                                                                                                                                                                                           |      |        |  |         |  |        |        |        |        |       |             |             |     |                |       |            |             |     |                |       |     |             |            |             |       |     |            |     |             |       |     |            |     |            |       |     |     |     |            |       |     |     |     |     |     |     |     |     |     |      |        |        |        |        |       |            |             |     |                |       |            |             |     |                |       |            |             |            |             |       |     |             |            |             |       |     |            |            |            |       |     |     |     |            |       |     |     |     |     |     |     |     |     |     |      |        |        |        |        |       |     |            |     |     |       |     |            |     |     |       |     |            |     |            |       |     |     |     |            |       |     |     |     |     |       |     |     |     |     |       |     |     |     |     |     |     |     |     |     |
| 25-29                                                            | 1.3                                     | <b>10.8</b>                                                                                                                                                                                                                                      | <b>3.4</b>                                                                  | <b>17.2</b>                                                                                                                                                                                                                                                                                                                                                                                                                                                                                                                                                                                                                                                                                                                                                                                                                                                                                                                                                                                                                                                                                                                                                                                                                                                                                                                                                                                                                                                                                                                                                                                                                                                                                                                                                                                                                                                                                                                                                                                                                                                                                                                                                                                                                                                                                                                                                                                                                                                                                                                                                                                                                                                                                                                                                                                                                                                                                                                                                                                                                                                                                                                                                                                                                                                                                                                                                                                                                                                                                                                                                                                           |      |        |  |         |  |        |        |        |        |       |             |             |     |                |       |            |             |     |                |       |     |             |            |             |       |     |            |     |             |       |     |            |     |            |       |     |     |     |            |       |     |     |     |     |     |     |     |     |     |      |        |        |        |        |       |            |             |     |                |       |            |             |     |                |       |            |             |            |             |       |     |             |            |             |       |     |            |            |            |       |     |     |     |            |       |     |     |     |     |     |     |     |     |     |      |        |        |        |        |       |     |            |     |     |       |     |            |     |     |       |     |            |     |            |       |     |     |     |            |       |     |     |     |     |       |     |     |     |     |       |     |     |     |     |     |     |     |     |     |
| 30-39                                                            | 0.5                                     | <b>5.2</b>                                                                                                                                                                                                                                       | <b>2.3</b>                                                                  | <b>6.7</b>                                                                                                                                                                                                                                                                                                                                                                                                                                                                                                                                                                                                                                                                                                                                                                                                                                                                                                                                                                                                                                                                                                                                                                                                                                                                                                                                                                                                                                                                                                                                                                                                                                                                                                                                                                                                                                                                                                                                                                                                                                                                                                                                                                                                                                                                                                                                                                                                                                                                                                                                                                                                                                                                                                                                                                                                                                                                                                                                                                                                                                                                                                                                                                                                                                                                                                                                                                                                                                                                                                                                                                                            |      |        |  |         |  |        |        |        |        |       |             |             |     |                |       |            |             |     |                |       |     |             |            |             |       |     |            |     |             |       |     |            |     |            |       |     |     |     |            |       |     |     |     |     |     |     |     |     |     |      |        |        |        |        |       |            |             |     |                |       |            |             |     |                |       |            |             |            |             |       |     |             |            |             |       |     |            |            |            |       |     |     |     |            |       |     |     |     |     |     |     |     |     |     |      |        |        |        |        |       |     |            |     |     |       |     |            |     |     |       |     |            |     |            |       |     |     |     |            |       |     |     |     |     |       |     |     |     |     |       |     |     |     |     |     |     |     |     |     |
| 40-49                                                            | 0.3                                     | 2.0                                                                                                                                                                                                                                              | 0.2                                                                         | <b>2.9</b>                                                                                                                                                                                                                                                                                                                                                                                                                                                                                                                                                                                                                                                                                                                                                                                                                                                                                                                                                                                                                                                                                                                                                                                                                                                                                                                                                                                                                                                                                                                                                                                                                                                                                                                                                                                                                                                                                                                                                                                                                                                                                                                                                                                                                                                                                                                                                                                                                                                                                                                                                                                                                                                                                                                                                                                                                                                                                                                                                                                                                                                                                                                                                                                                                                                                                                                                                                                                                                                                                                                                                                                            |      |        |  |         |  |        |        |        |        |       |             |             |     |                |       |            |             |     |                |       |     |             |            |             |       |     |            |     |             |       |     |            |     |            |       |     |     |     |            |       |     |     |     |     |     |     |     |     |     |      |        |        |        |        |       |            |             |     |                |       |            |             |     |                |       |            |             |            |             |       |     |             |            |             |       |     |            |            |            |       |     |     |     |            |       |     |     |     |     |     |     |     |     |     |      |        |        |        |        |       |     |            |     |     |       |     |            |     |     |       |     |            |     |            |       |     |     |     |            |       |     |     |     |     |       |     |     |     |     |       |     |     |     |     |     |     |     |     |     |
| 50-64                                                            | 0.2                                     | 0.3                                                                                                                                                                                                                                              | 0.5                                                                         | 0.6                                                                                                                                                                                                                                                                                                                                                                                                                                                                                                                                                                                                                                                                                                                                                                                                                                                                                                                                                                                                                                                                                                                                                                                                                                                                                                                                                                                                                                                                                                                                                                                                                                                                                                                                                                                                                                                                                                                                                                                                                                                                                                                                                                                                                                                                                                                                                                                                                                                                                                                                                                                                                                                                                                                                                                                                                                                                                                                                                                                                                                                                                                                                                                                                                                                                                                                                                                                                                                                                                                                                                                                                   |      |        |  |         |  |        |        |        |        |       |             |             |     |                |       |            |             |     |                |       |     |             |            |             |       |     |            |     |             |       |     |            |     |            |       |     |     |     |            |       |     |     |     |     |     |     |     |     |     |      |        |        |        |        |       |            |             |     |                |       |            |             |     |                |       |            |             |            |             |       |     |             |            |             |       |     |            |            |            |       |     |     |     |            |       |     |     |     |     |     |     |     |     |     |      |        |        |        |        |       |     |            |     |     |       |     |            |     |     |       |     |            |     |            |       |     |     |     |            |       |     |     |     |     |       |     |     |     |     |       |     |     |     |     |     |     |     |     |     |
| 65+                                                              | 0.2                                     | 0.1                                                                                                                                                                                                                                              | 0.1                                                                         | 0.3                                                                                                                                                                                                                                                                                                                                                                                                                                                                                                                                                                                                                                                                                                                                                                                                                                                                                                                                                                                                                                                                                                                                                                                                                                                                                                                                                                                                                                                                                                                                                                                                                                                                                                                                                                                                                                                                                                                                                                                                                                                                                                                                                                                                                                                                                                                                                                                                                                                                                                                                                                                                                                                                                                                                                                                                                                                                                                                                                                                                                                                                                                                                                                                                                                                                                                                                                                                                                                                                                                                                                                                                   |      |        |  |         |  |        |        |        |        |       |             |             |     |                |       |            |             |     |                |       |     |             |            |             |       |     |            |     |             |       |     |            |     |            |       |     |     |     |            |       |     |     |     |     |     |     |     |     |     |      |        |        |        |        |       |            |             |     |                |       |            |             |     |                |       |            |             |            |             |       |     |             |            |             |       |     |            |            |            |       |     |     |     |            |       |     |     |     |     |     |     |     |     |     |      |        |        |        |        |       |     |            |     |     |       |     |            |     |     |       |     |            |     |            |       |     |     |     |            |       |     |     |     |     |       |     |     |     |     |       |     |     |     |     |     |     |     |     |     |
| Ages                                                             | Dose 1                                  | Dose 2                                                                                                                                                                                                                                           | Dose 1                                                                      | Dose 2                                                                                                                                                                                                                                                                                                                                                                                                                                                                                                                                                                                                                                                                                                                                                                                                                                                                                                                                                                                                                                                                                                                                                                                                                                                                                                                                                                                                                                                                                                                                                                                                                                                                                                                                                                                                                                                                                                                                                                                                                                                                                                                                                                                                                                                                                                                                                                                                                                                                                                                                                                                                                                                                                                                                                                                                                                                                                                                                                                                                                                                                                                                                                                                                                                                                                                                                                                                                                                                                                                                                                                                                |      |        |  |         |  |        |        |        |        |       |             |             |     |                |       |            |             |     |                |       |     |             |            |             |       |     |            |     |             |       |     |            |     |            |       |     |     |     |            |       |     |     |     |     |     |     |     |     |     |      |        |        |        |        |       |            |             |     |                |       |            |             |     |                |       |            |             |            |             |       |     |             |            |             |       |     |            |            |            |       |     |     |     |            |       |     |     |     |     |     |     |     |     |     |      |        |        |        |        |       |     |            |     |     |       |     |            |     |     |       |     |            |     |            |       |     |     |     |            |       |     |     |     |     |       |     |     |     |     |       |     |     |     |     |     |     |     |     |     |
| 12-15                                                            | 0.4                                     | <b>3.9</b>                                                                                                                                                                                                                                       | 0.0                                                                         | 0.0                                                                                                                                                                                                                                                                                                                                                                                                                                                                                                                                                                                                                                                                                                                                                                                                                                                                                                                                                                                                                                                                                                                                                                                                                                                                                                                                                                                                                                                                                                                                                                                                                                                                                                                                                                                                                                                                                                                                                                                                                                                                                                                                                                                                                                                                                                                                                                                                                                                                                                                                                                                                                                                                                                                                                                                                                                                                                                                                                                                                                                                                                                                                                                                                                                                                                                                                                                                                                                                                                                                                                                                                   |      |        |  |         |  |        |        |        |        |       |             |             |     |                |       |            |             |     |                |       |     |             |            |             |       |     |            |     |             |       |     |            |     |            |       |     |     |     |            |       |     |     |     |     |     |     |     |     |     |      |        |        |        |        |       |            |             |     |                |       |            |             |     |                |       |            |             |            |             |       |     |             |            |             |       |     |            |            |            |       |     |     |     |            |       |     |     |     |     |     |     |     |     |     |      |        |        |        |        |       |     |            |     |     |       |     |            |     |     |       |     |            |     |            |       |     |     |     |            |       |     |     |     |     |       |     |     |     |     |       |     |     |     |     |     |     |     |     |     |
| 16-17                                                            | 0.0                                     | <b>7.9</b>                                                                                                                                                                                                                                       | 0.0                                                                         | 0.0                                                                                                                                                                                                                                                                                                                                                                                                                                                                                                                                                                                                                                                                                                                                                                                                                                                                                                                                                                                                                                                                                                                                                                                                                                                                                                                                                                                                                                                                                                                                                                                                                                                                                                                                                                                                                                                                                                                                                                                                                                                                                                                                                                                                                                                                                                                                                                                                                                                                                                                                                                                                                                                                                                                                                                                                                                                                                                                                                                                                                                                                                                                                                                                                                                                                                                                                                                                                                                                                                                                                                                                                   |      |        |  |         |  |        |        |        |        |       |             |             |     |                |       |            |             |     |                |       |     |             |            |             |       |     |            |     |             |       |     |            |     |            |       |     |     |     |            |       |     |     |     |     |     |     |     |     |     |      |        |        |        |        |       |            |             |     |                |       |            |             |     |                |       |            |             |            |             |       |     |             |            |             |       |     |            |            |            |       |     |     |     |            |       |     |     |     |     |     |     |     |     |     |      |        |        |        |        |       |     |            |     |     |       |     |            |     |     |       |     |            |     |            |       |     |     |     |            |       |     |     |     |     |       |     |     |     |     |       |     |     |     |     |     |     |     |     |     |
| 18-24                                                            | 0.2                                     | <b>2.5</b>                                                                                                                                                                                                                                       | 0.6                                                                         | <b>5.3</b>                                                                                                                                                                                                                                                                                                                                                                                                                                                                                                                                                                                                                                                                                                                                                                                                                                                                                                                                                                                                                                                                                                                                                                                                                                                                                                                                                                                                                                                                                                                                                                                                                                                                                                                                                                                                                                                                                                                                                                                                                                                                                                                                                                                                                                                                                                                                                                                                                                                                                                                                                                                                                                                                                                                                                                                                                                                                                                                                                                                                                                                                                                                                                                                                                                                                                                                                                                                                                                                                                                                                                                                            |      |        |  |         |  |        |        |        |        |       |             |             |     |                |       |            |             |     |                |       |     |             |            |             |       |     |            |     |             |       |     |            |     |            |       |     |     |     |            |       |     |     |     |     |     |     |     |     |     |      |        |        |        |        |       |            |             |     |                |       |            |             |     |                |       |            |             |            |             |       |     |             |            |             |       |     |            |            |            |       |     |     |     |            |       |     |     |     |     |     |     |     |     |     |      |        |        |        |        |       |     |            |     |     |       |     |            |     |     |       |     |            |     |            |       |     |     |     |            |       |     |     |     |     |       |     |     |     |     |       |     |     |     |     |     |     |     |     |     |
| 25-29                                                            | 0.2                                     | 1.2                                                                                                                                                                                                                                              | 0.4                                                                         | <b>5.7</b>                                                                                                                                                                                                                                                                                                                                                                                                                                                                                                                                                                                                                                                                                                                                                                                                                                                                                                                                                                                                                                                                                                                                                                                                                                                                                                                                                                                                                                                                                                                                                                                                                                                                                                                                                                                                                                                                                                                                                                                                                                                                                                                                                                                                                                                                                                                                                                                                                                                                                                                                                                                                                                                                                                                                                                                                                                                                                                                                                                                                                                                                                                                                                                                                                                                                                                                                                                                                                                                                                                                                                                                            |      |        |  |         |  |        |        |        |        |       |             |             |     |                |       |            |             |     |                |       |     |             |            |             |       |     |            |     |             |       |     |            |     |            |       |     |     |     |            |       |     |     |     |     |     |     |     |     |     |      |        |        |        |        |       |            |             |     |                |       |            |             |     |                |       |            |             |            |             |       |     |             |            |             |       |     |            |            |            |       |     |     |     |            |       |     |     |     |     |     |     |     |     |     |      |        |        |        |        |       |     |            |     |     |       |     |            |     |     |       |     |            |     |            |       |     |     |     |            |       |     |     |     |     |       |     |     |     |     |       |     |     |     |     |     |     |     |     |     |
| 30-39                                                            | 0.6                                     | 0.7                                                                                                                                                                                                                                              | 0.5                                                                         | 0.4                                                                                                                                                                                                                                                                                                                                                                                                                                                                                                                                                                                                                                                                                                                                                                                                                                                                                                                                                                                                                                                                                                                                                                                                                                                                                                                                                                                                                                                                                                                                                                                                                                                                                                                                                                                                                                                                                                                                                                                                                                                                                                                                                                                                                                                                                                                                                                                                                                                                                                                                                                                                                                                                                                                                                                                                                                                                                                                                                                                                                                                                                                                                                                                                                                                                                                                                                                                                                                                                                                                                                                                                   |      |        |  |         |  |        |        |        |        |       |             |             |     |                |       |            |             |     |                |       |     |             |            |             |       |     |            |     |             |       |     |            |     |            |       |     |     |     |            |       |     |     |     |     |     |     |     |     |     |      |        |        |        |        |       |            |             |     |                |       |            |             |     |                |       |            |             |            |             |       |     |             |            |             |       |     |            |            |            |       |     |     |     |            |       |     |     |     |     |     |     |     |     |     |      |        |        |        |        |       |     |            |     |     |       |     |            |     |     |       |     |            |     |            |       |     |     |     |            |       |     |     |     |     |       |     |     |     |     |       |     |     |     |     |     |     |     |     |     |
| 40-49                                                            | 0.1                                     | 1.1                                                                                                                                                                                                                                              | 0.2                                                                         | 1.4                                                                                                                                                                                                                                                                                                                                                                                                                                                                                                                                                                                                                                                                                                                                                                                                                                                                                                                                                                                                                                                                                                                                                                                                                                                                                                                                                                                                                                                                                                                                                                                                                                                                                                                                                                                                                                                                                                                                                                                                                                                                                                                                                                                                                                                                                                                                                                                                                                                                                                                                                                                                                                                                                                                                                                                                                                                                                                                                                                                                                                                                                                                                                                                                                                                                                                                                                                                                                                                                                                                                                                                                   |      |        |  |         |  |        |        |        |        |       |             |             |     |                |       |            |             |     |                |       |     |             |            |             |       |     |            |     |             |       |     |            |     |            |       |     |     |     |            |       |     |     |     |     |     |     |     |     |     |      |        |        |        |        |       |            |             |     |                |       |            |             |     |                |       |            |             |            |             |       |     |             |            |             |       |     |            |            |            |       |     |     |     |            |       |     |     |     |     |     |     |     |     |     |      |        |        |        |        |       |     |            |     |     |       |     |            |     |     |       |     |            |     |            |       |     |     |     |            |       |     |     |     |     |       |     |     |     |     |       |     |     |     |     |     |     |     |     |     |
| 50-64                                                            | 0.3                                     | 0.5                                                                                                                                                                                                                                              | 0.5                                                                         | 0.4                                                                                                                                                                                                                                                                                                                                                                                                                                                                                                                                                                                                                                                                                                                                                                                                                                                                                                                                                                                                                                                                                                                                                                                                                                                                                                                                                                                                                                                                                                                                                                                                                                                                                                                                                                                                                                                                                                                                                                                                                                                                                                                                                                                                                                                                                                                                                                                                                                                                                                                                                                                                                                                                                                                                                                                                                                                                                                                                                                                                                                                                                                                                                                                                                                                                                                                                                                                                                                                                                                                                                                                                   |      |        |  |         |  |        |        |        |        |       |             |             |     |                |       |            |             |     |                |       |     |             |            |             |       |     |            |     |             |       |     |            |     |            |       |     |     |     |            |       |     |     |     |     |     |     |     |     |     |      |        |        |        |        |       |            |             |     |                |       |            |             |     |                |       |            |             |            |             |       |     |             |            |             |       |     |            |            |            |       |     |     |     |            |       |     |     |     |     |     |     |     |     |     |      |        |        |        |        |       |     |            |     |     |       |     |            |     |     |       |     |            |     |            |       |     |     |     |            |       |     |     |     |     |       |     |     |     |     |       |     |     |     |     |     |     |     |     |     |
| 65+                                                              | 0.1                                     | 0.3                                                                                                                                                                                                                                              | 0.0                                                                         | 0.3                                                                                                                                                                                                                                                                                                                                                                                                                                                                                                                                                                                                                                                                                                                                                                                                                                                                                                                                                                                                                                                                                                                                                                                                                                                                                                                                                                                                                                                                                                                                                                                                                                                                                                                                                                                                                                                                                                                                                                                                                                                                                                                                                                                                                                                                                                                                                                                                                                                                                                                                                                                                                                                                                                                                                                                                                                                                                                                                                                                                                                                                                                                                                                                                                                                                                                                                                                                                                                                                                                                                                                                                   |      |        |  |         |  |        |        |        |        |       |             |             |     |                |       |            |             |     |                |       |     |             |            |             |       |     |            |     |             |       |     |            |     |            |       |     |     |     |            |       |     |     |     |     |     |     |     |     |     |      |        |        |        |        |       |            |             |     |                |       |            |             |     |                |       |            |             |            |             |       |     |             |            |             |       |     |            |            |            |       |     |     |     |            |       |     |     |     |     |     |     |     |     |     |      |        |        |        |        |       |     |            |     |     |       |     |            |     |     |       |     |            |     |            |       |     |     |     |            |       |     |     |     |     |       |     |     |     |     |       |     |     |     |     |     |     |     |     |     |
| VAERS* Jun 30<br><br>Up to Jun 30 2021                           | Pfizer-BioNTech or Moderna              | Myocarditis                                                                                                                                                                                                                                      | Crude reporting rates after dose 2<br><br>Subgroups by age and sex          | Overall ≥18 yrs: 3.5 cases per million second doses<br><br><u>Subgroups (all after dose 2):</u>                                                                                                                                                                                                                                                                                                                                                                                                                                                                                                                                                                                                                                                                                                                                                                                                                                                                                                                                                                                                                                                                                                                                                                                                                                                                                                                                                                                                                                                                                                                                                                                                                                                                                                                                                                                                                                                                                                                                                                                                                                                                                                                                                                                                                                                                                                                                                                                                                                                                                                                                                                                                                                                                                                                                                                                                                                                                                                                                                                                                                                                                                                                                                                                                                                                                                                                                                                                                                                                                                                       |      |        |  |         |  |        |        |        |        |       |             |             |     |                |       |            |             |     |                |       |     |             |            |             |       |     |            |     |             |       |     |            |     |            |       |     |     |     |            |       |     |     |     |     |     |     |     |     |     |      |        |        |        |        |       |            |             |     |                |       |            |             |     |                |       |            |             |            |             |       |     |             |            |             |       |     |            |            |            |       |     |     |     |            |       |     |     |     |     |     |     |     |     |     |      |        |        |        |        |       |     |            |     |     |       |     |            |     |     |       |     |            |     |            |       |     |     |     |            |       |     |     |     |     |       |     |     |     |     |       |     |     |     |     |     |     |     |     |     |

| Dataset<br>Dates of data<br>Country of Data                | Vaccines Studied                                                                                                 | Outcome(s); Case Ascertainment & Risk Interval                                                                                                                                                                                                            | Analysis                                                                                                                                                                                                                | Results                                                                                                                                                                                                                                                                                                                                                                                                                                                                                                                                                                                                                                            |
|------------------------------------------------------------|------------------------------------------------------------------------------------------------------------------|-----------------------------------------------------------------------------------------------------------------------------------------------------------------------------------------------------------------------------------------------------------|-------------------------------------------------------------------------------------------------------------------------------------------------------------------------------------------------------------------------|----------------------------------------------------------------------------------------------------------------------------------------------------------------------------------------------------------------------------------------------------------------------------------------------------------------------------------------------------------------------------------------------------------------------------------------------------------------------------------------------------------------------------------------------------------------------------------------------------------------------------------------------------|
| USA<br>Rosenblum, 2021                                     | After dose 2, timing NR                                                                                          | Cases in persons aged 18–29 yrs were individually reviewed and confirmed to meet CDC case definitions<br><br>Risk interval: 42 d                                                                                                                          |                                                                                                                                                                                                                         | Females<br>18-29 yrs: 3-4 cases per million second doses<br>30-49 yrs: 1-2 cases per million second doses<br>50-64 yrs: 1 case per million second doses<br>≥65 yrs: <1 case per million second doses<br><br>Males<br>18-29 yrs: 22-27 cases per million second doses<br>30-49 yrs: 5-6 cases per million second doses<br>50-64 yrs: 1 case per million second doses<br>≥65 yrs: 1 case per million second doses                                                                                                                                                                                                                                    |
| VAERS* Jun 11<br>Up to Jun 11 2021<br>USA<br>Gargano 2021  | Pfizer-BioNTech or Moderna<br><br>After dose 2, timing NR                                                        | Myocarditis<br><br>Note: Subset of confirmed cases described and included in KQ2<br><br>Risk interval: 7 d                                                                                                                                                | Crude reporting rates (i.e., using confirmed and unconfirmed cases), after dose 2                                                                                                                                       | Males 12-29 yrs: 40.6 cases per million second doses<br>Males 12-17 yrs: 62.8 cases per million second doses<br>Males 18-24 yrs: 50.5 cases per million second doses<br>Males ≥30 yrs: 2.4 cases per million second doses<br>Females 12-29 yrs: 4.2 cases per million second doses<br>Females ≥30 yrs: 1.0 cases per million second doses                                                                                                                                                                                                                                                                                                          |
| VAERS* Aug 6<br>Up to Aug 6 2021<br>US<br>Lane 2021        | Pfizer-BioNTech, Moderna<br><br>At least one dose (UK, EEA) or 2 doses (US); schedule NR.                        | Myocarditis and pericarditis<br><br>Events labelled "Myocarditis" or "Pericarditis"<br><br>Risk interval: None applied (date of vaccine launch to datalockpoint)                                                                                          | Crude reporting rates per million people receiving at least one dose (UK, EEA) or receiving both doses (US)                                                                                                             | <u>UK</u><br>Pfizer/BioNTech: 7.93 cases of myocarditis and 6.73 cases pericarditis per million vaccinees<br>Moderna: 2.07 cases of myocarditis and 1.79 cases of pericarditis per million vaccinees<br><br><u>EEA</u><br>Pfizer/BioNTech: 4.23 cases of myocarditis and 2.87 cases of pericarditis per million vaccinees<br>Moderna: 6.15 cases of myocarditis and 3.84 cases of pericarditis per million vaccinees<br><br><u>US (after dose 2)</u><br>Pfizer/BioNTech: 6.47 cases of myocarditis and 3.53 cases of pericarditis per million vaccinees<br>Moderna: 3.65 cases of myocarditis and 2.69 cases of pericarditis per million vaccinees |
| VAERS* Jun 18a<br>Jan 1 to Jun 18 2021<br>USA<br>Høeg 2021 | Pfizer-BioNTech or Moderna (but only 1 of 257 cases since not approved for <18y at that time)<br><br>Schedule NR | Myocarditis<br><br>"Myocarditis," "pericarditis," "myopericarditis" or "chest pain" in the symptom notes; "troponin" required element in the laboratory data.<br><br>CDC working case definition of probable myocarditis<br><br>Risk interval: Any timing | Crude rates per million vaccinees<br><br>Cases with an unknown dose number were assigned to dose 1 or dose 2 in the same proportion as the known doses: 15% occurred following dose 1 and 85% occurred following dose 2 | Events: 257 (92% within 5 d; 90% males)<br><br><u>At least Dose 1</u><br>Males 12-15 yrs: 12.0 per million vaccinees<br>Males 16-17 yrs: 8.2 per million vaccinees<br>Females 12-15 yrs: 0 per million vaccinees<br>Females 16-17 yrs: 2.0 per million vaccinees<br><u>Dose 2</u><br>Males 12-15 yrs: 162.2 per million vaccinees<br>Males 16-17 yrs: 94.0 per million vaccinees<br>Females 12-15 yrs: 13.0 per million vaccinees<br>Females 16-17 yrs: 13.4 per million vaccinees                                                                                                                                                                 |
| VAERS* Jun 18b<br>USA<br>Lazaros 2021                      | AstraZeneca<br>Janssen<br>Moderna<br>Pfizer-BioNTech                                                             | Pericarditis<br><br>Ascertainment NR                                                                                                                                                                                                                      | Crude rate per million vaccine doses<br><br>Raw data available to calculate crude age and sex subgroup rates if needed.                                                                                                 | <u>EEA</u><br>AstraZeneca: 2.604 per million doses<br>Janssen: 2.530 per million doses<br>Total vectored: 2.596 per million doses<br>Moderna: 4.023 per million doses<br>Pfizer-BioNTech: 1.613 per million doses                                                                                                                                                                                                                                                                                                                                                                                                                                  |

| Dataset<br>Dates of data<br>Country of Data                                                                     | Vaccines Studied                                                                              | Outcome(s); Case Ascertainment &<br>Risk Interval                                                                                                                         | Analysis                                      | Results                                                                                                                                                                                                                                                                                                                                                                                                                                                                                                                                                                                                                                                                                                                                                              |
|-----------------------------------------------------------------------------------------------------------------|-----------------------------------------------------------------------------------------------|---------------------------------------------------------------------------------------------------------------------------------------------------------------------------|-----------------------------------------------|----------------------------------------------------------------------------------------------------------------------------------------------------------------------------------------------------------------------------------------------------------------------------------------------------------------------------------------------------------------------------------------------------------------------------------------------------------------------------------------------------------------------------------------------------------------------------------------------------------------------------------------------------------------------------------------------------------------------------------------------------------------------|
|                                                                                                                 | Dose and schedule not specified.                                                              |                                                                                                                                                                           |                                               | Total mRNA: 1.882 per million doses                                                                                                                                                                                                                                                                                                                                                                                                                                                                                                                                                                                                                                                                                                                                  |
| CAEFISS & CVP<br>Up to Oct 8 2021<br>Canada<br>PHAC 2021                                                        | AstraZeneca, Moderna (≥12 y), Pfizer-BioNTech (≥12 y)<br><br>Dose and schedule not specified. | Myocarditis or pericarditis<br><br>Cases meeting Level 1-4 to Brighton Criteria of Diagnostic Certainty (not all probable or definitive)<br><br>Risk interval: Any timing | Reported rates per 100,000 doses administered | Events: 913<br><br>Moderna: 2.51 cases per 100,000 doses<br>Pfizer-BioNTech: 1.37 cases per 100,000 doses<br>AstraZeneca: 0.72 cases per 100,000 doses                                                                                                                                                                                                                                                                                                                                                                                                                                                                                                                                                                                                               |
| Yellow Card Oct 13<br>Dec 9 2020 to Oct 13 2021<br>UK<br>Medicines & Healthcare Products Regulatory Agency 2021 | AstraZeneca, Moderna, Pfizer-BioNTech<br><br>After dose 1 or 2; schedule NR                   | Myocarditis and pericarditis (including those from viral/other infective causes)<br><br>Ascertainment NR<br><br>Risk interval: NR                                         | Reporting rates per million doses             | <u>Overall</u><br>Pfizer-BioNTech: myocarditis 8 cases per million doses; pericarditis 6 cases per million doses<br>Moderna: myocarditis 32 cases per million doses; pericarditis 19 cases per million doses<br>AstraZeneca: myocarditis 3 cases per million doses; pericarditis 4 cases per million doses<br><br><u>Subgroups:</u><br>Myocarditis/pericarditis<br><18 yrs<br>Pfizer-BioNTech: 10 cases per million doses<br>Moderna: 0 cases<br>AstraZeneca: 0 cases<br><br>18-49 yrs<br>Pfizer-BioNTech: 18 cases per million doses<br>Moderna: 44 cases per million doses<br>AstraZeneca: 8 cases per million doses<br><br>≥50 yrs<br>Pfizer-BioNTech: 5 cases per million doses<br>Moderna: 29 cases per million doses<br>AstraZeneca: 4 cases per million doses |
| Israel MOH* May 30<br>Dec 2020 to May 30 2021<br>Israel                                                         | Pfizer-BioNTech (≥16 y)<br><br>Dose 1 and 2; schedule NR                                      | Myocarditis<br><br>Ascertainment NR<br><br>Risk interval: 30 d after dose 2                                                                                               | Crude number of cases and doses               | Dose 1:<br>27 cases of 5,401,150 vaccinated individuals (5 per million) (11 had pre-existing conditions)<br><br>Within 30 d after dose 2:<br>121 cases of 5,049,424 vaccinated individuals (24 per million) (60 had pre-existing conditions)                                                                                                                                                                                                                                                                                                                                                                                                                                                                                                                         |
| Eudra Vigilance Oct 19**<br>Up to Oct 19 2021<br>EEA<br>European Medicines Agency 2021                          | AstraZeneca<br>Janssen<br>Moderna<br>Pfizer-BioNTech<br><br>Dose and schedule NR              | Myocarditis, pericarditis<br><br>Ascertainment NR<br><br>Risk interval: NR                                                                                                | Crude number of case and doses                | <u>Overall:</u><br>Moderna: 1578 cases of myocarditis and 850 cases of pericarditis across 61,172,753 doses administered† (25.8 per million & 13.9 per million)<br>Pfizer: 3610 cases of myocarditis and 2883 cases of pericarditis across 424,162,518 doses administered† (8.5 per million & 6.8 per million)<br>AstraZeneca: 320 cases of myocarditis and 416 cases of pericarditis across 68,799,957 doses administered† (4.7 per million & 6.0 per million)<br>Janssen: 103 cases of myocarditis and 101 cases of pericarditis across 15,782,596 doses administered† (6.5 per million & 6.4 per million)<br><br><u>Age &lt;18y</u>                                                                                                                               |



| Dataset<br>Dates of data<br>Country of Data | Vaccines Studied | Outcome(s); Case Ascertainment &<br>Risk Interval | Analysis | Results                                                                                                                                                                                                                              |
|---------------------------------------------|------------------|---------------------------------------------------|----------|--------------------------------------------------------------------------------------------------------------------------------------------------------------------------------------------------------------------------------------|
|                                             |                  |                                                   |          | Moderna: 32 reports of myocarditis across 531,050 people receiving at least one dose† (60.3 events per million)<br>Pfizer: 369 reports of myocarditis across 8,874,141 people receiving at least one dose† (41.6 events per million) |

\*Indicates passive surveillance system with mandatory/legal reporting requirements for healthcare providers of adverse events after COVID-19 vaccines.

†Number of administered vaccine doses from European Center for Disease Control (ECDC), up to end of Week 41 2021 (Oct 16 2021). Period of vaccine doses is shorter than event reporting to account for time period between receiving vaccine and experiencing the event of interest (i.e., individuals vaccinated on October 19 are unlikely to be reporting myocarditis as an AE on that same day)

**Table A3. Summary of risk of bias assessments for observational studies/surveillance data (question 1)**

| Dataset                                                    | Were the two groups similar and recruited from the same population? | Was vaccination status measured in a reliable or valid way? | Were confounding factors identified and appropriately addressed in design or analysis? | Were the outcomes measured in a valid and reliable way? | Was the follow up time long enough for outcomes to occur? | Were the large majority of cases likely to have been identified? | Overall assessment of risk of bias |
|------------------------------------------------------------|---------------------------------------------------------------------|-------------------------------------------------------------|----------------------------------------------------------------------------------------|---------------------------------------------------------|-----------------------------------------------------------|------------------------------------------------------------------|------------------------------------|
| <b>Active Surveillance Studies</b>                         |                                                                     |                                                             |                                                                                        |                                                         |                                                           |                                                                  |                                    |
| VSD Jun 26<br>Klein 2021 Ref ID 22                         | Y                                                                   | Y                                                           | U                                                                                      | Y                                                       | Y                                                         | Y                                                                | Some concerns                      |
| Israel MOH May 31<br>Mevorach 2021 Ref ID 3440             | Y                                                                   | U                                                           | N                                                                                      | Y                                                       | Y                                                         | Y                                                                | Some concerns                      |
| Clalit Health May 24a<br>Witberg Ref ID 3441               | NA                                                                  | Y                                                           | Y                                                                                      | Y                                                       | Y                                                         | Y                                                                | Low                                |
| Clalit Health May 24b<br>Barda 2021 Ref ID 1282            | Y                                                                   | Y                                                           | Y                                                                                      | Y                                                       | Y                                                         | Y                                                                | Low                                |
| Israeli Defense Forces May 7<br>Levin 2021 Ref ID 512      | NA                                                                  | Y                                                           | N                                                                                      | Y                                                       | N                                                         | Y                                                                | Some concerns                      |
| Genesis Healthcare Feb 14<br>Bardenheier 2021a Ref ID 144  | Y                                                                   | Y                                                           | Y                                                                                      | Y                                                       | U                                                         | Y                                                                | Some concerns                      |
| Genesis Healthcare Jan 3<br>Bardenheier, 2021b ref ID 1972 | Y                                                                   | Y                                                           | Y                                                                                      | Y                                                       | U                                                         | Y                                                                | Some concerns                      |
| KPSC Jul 2<br>Simone 2021 Ref ID 22                        | Y                                                                   | Y                                                           | U                                                                                      | Y                                                       | U                                                         | Y                                                                | Some concerns                      |
| Providence Health May 25<br>Diaz 2021 Ref ID 525           | Y                                                                   | Y                                                           | N                                                                                      | U                                                       | N                                                         | Y                                                                | High                               |
| VSD Oct 9<br>(Klein 2021 Oct ACIP)                         | Y                                                                   | Y                                                           | U                                                                                      | Y                                                       | Y                                                         | Y                                                                | Some concerns                      |
| VSD Aug 21                                                 | Y                                                                   | Y                                                           | U                                                                                      | Y                                                       | Y                                                         | Y                                                                | Some concerns                      |

|                                                                           |    |   |   |   |   |   |      |
|---------------------------------------------------------------------------|----|---|---|---|---|---|------|
| Klein 2021 Aug ACIP)                                                      |    |   |   |   |   |   |      |
| <b>Passive Surveillance Studies</b>                                       |    |   |   |   |   |   |      |
| VAERS Oct 6 Su, 2021 (ACIP Oct 20-21 2021 meeting)                        | NA | N | N | Y | Y | N | High |
| VAERS Jun 30 Rosenblum, 2021                                              | NA | N | N | U | U | N | High |
| VAERS Jun 11 Gargano 2021                                                 | NA | N | N | U | Y | N | High |
| VAERS Aug 6 Lane 2021                                                     | NA | N | N | N | U | N | High |
| VAERS Jun 18a Høeg 2021                                                   | NA | N | N | U | U | N | High |
| VAERS Jun 18b Lazaros 2021                                                | NA | U | N | U | U | N | High |
| CAEFISS & CVP PHAC 2021                                                   | NA | U | N | N | N | U | High |
| Yellow Card Oct 13 Medicines & Healthcare Products Regulatory Agency 2021 | NA | U | N | U | U | N | High |
| Israel MOH May 30 Israel Ministry of Health 2021                          | NA | U | N | U | Y | U | High |
| EudraVigilance Oct 19 European Medicines Agency 2021                      | NA | Y | N | U | U | N | High |

**Table A4. Study characteristics of randomized controlled trials (question 1)**

| Trial name;<br>Author (year);<br>Country (number of sites);<br>Dates of enrolment<br>Funding | Eligibility,<br>Randomization &<br>Blinding | Study Arms                                 |                                      | Baseline Demographics   | Outcome(s);<br>Safety Assessment | Analysis                        | Results                                         |
|----------------------------------------------------------------------------------------------|---------------------------------------------|--------------------------------------------|--------------------------------------|-------------------------|----------------------------------|---------------------------------|-------------------------------------------------|
|                                                                                              |                                             | Vaccine arm                                | Placebo arm                          |                         |                                  |                                 |                                                 |
| Teen COVE trial,<br>Phase 2/3,                                                               | Included adolescents<br>12-17 y             | mRNA-1273 (Moderna),<br>2 doses 28 d apart | Saline placebo<br>2 doses 28 d apart | Total randomized: 3,732 | Myocarditis &<br>pericarditis    | Safety analysis<br>included all | <b>Myocarditis: 0</b><br><b>Pericarditis: 0</b> |

| Trial name;<br>Author (year);<br>Country (number of sites);<br>Dates of enrolment<br>Funding                                                                               | Eligibility,<br>Randomization &<br>Blinding                                                                                                                                                                                                                                                                                                                                                            | Study Arms                                                                                                                                                                                                                                                           |                                                                                                                                                                                                                                                     | Baseline Demographics                                                                                                                                                                                                                                                                                             | Outcome(s);<br>Safety Assessment                                                                                                                                                                                                                                                                                                                                                                                                                                                                                                                                                                  | Analysis                                                                                                             | Results                                                                                                                                          |
|----------------------------------------------------------------------------------------------------------------------------------------------------------------------------|--------------------------------------------------------------------------------------------------------------------------------------------------------------------------------------------------------------------------------------------------------------------------------------------------------------------------------------------------------------------------------------------------------|----------------------------------------------------------------------------------------------------------------------------------------------------------------------------------------------------------------------------------------------------------------------|-----------------------------------------------------------------------------------------------------------------------------------------------------------------------------------------------------------------------------------------------------|-------------------------------------------------------------------------------------------------------------------------------------------------------------------------------------------------------------------------------------------------------------------------------------------------------------------|---------------------------------------------------------------------------------------------------------------------------------------------------------------------------------------------------------------------------------------------------------------------------------------------------------------------------------------------------------------------------------------------------------------------------------------------------------------------------------------------------------------------------------------------------------------------------------------------------|----------------------------------------------------------------------------------------------------------------------|--------------------------------------------------------------------------------------------------------------------------------------------------|
|                                                                                                                                                                            |                                                                                                                                                                                                                                                                                                                                                                                                        | Vaccine arm                                                                                                                                                                                                                                                          | Placebo arm                                                                                                                                                                                                                                         |                                                                                                                                                                                                                                                                                                                   |                                                                                                                                                                                                                                                                                                                                                                                                                                                                                                                                                                                                   |                                                                                                                      |                                                                                                                                                  |
| <p>Ali (2021)</p> <p>USA (26)</p> <p>Dec 9, 2020 – Feb 28, 2021</p> <p>USA (26)</p> <p>Industry-funded</p>                                                                 | <p>Exclusions: travel outside of USA 28 d prior to screening; acute illness or fever 24 h prior to or at screening; previous administration of an investigational SARS-CoV-2 vaccine; pregnant or breastfeeding.</p> <p>Randomized 2:1; centralized interactive response technology system</p> <p>Study personnel and participants were blinded; pharmacists and vaccine administrators unblinded.</p> | <p>100 mcg per 0.5 ml dose</p> <p>Randomized: 2,489<br/>Dose 1: 2,486<br/>Dose 2: 2,480</p> <p>Safety population: 2,486<br/>Withdrawals:<br/>After dose 1: 18<br/>After dose 2: 188</p>                                                                              | <p>0.5 ml per dose</p> <p>Randomized: 1,243<br/>Dose 1: 1,240<br/>Dose 2: 1,222</p> <p>Safety population: 1,240</p> <p>Withdrawals:<br/>After dose 1: 6<br/>After dose 2: 57</p>                                                                    | <p>Total safety population: 3,726</p> <p>Male 51%<br/>Mean age 14.3 y<br/>12-15 y: 74%<br/>16-17 y: 26%<br/>White 84%</p> <p>Baseline SARS-CoV-2 status:<br/>Positive: 216 (6%), similar between arms;<br/>Missing: 268 (7%), similar between arms</p>                                                            | <p>Solicited local and systemic adverse reactions during 7 d after each injection;</p> <p><b>Unsolicited adverse events (AEs)</b>, defined as any event not present before exposure to study vaccination or any event already present that worsens in intensity or frequency after exposure, observed or reported during 28 d after each injection;</p> <p>AEs leading to discontinuation from a dose and/or study withdrawal, medically attended (MAEs) and serious AE (SAEs), throughout study period</p> <p>Unblinded safety data reviewed by independent data and safety monitoring board</p> | <p>participants who received at least one injection, according to treatment group</p>                                |                                                                                                                                                  |
| <p><b>COVE trial, Phase 3</b></p> <p>Baden (2021; primary publication) &amp; El-Sahly (2021)</p> <p>Jul 27, 2020 – Oct 23, 2020</p> <p>USA (99)</p> <p>Industry-funded</p> | <p>Included adults ≥18 y at appreciable risk of acquiring infection or high risk of severe COVID-19, or both;</p> <p>Exclusions: immunosuppression or received systemic immunosuppressant/immune-modifying drugs for &gt;14 d total in prior 6 mos; known history of SARS-CoV-2 infection; pregnant or breastfeeding,</p>                                                                              | <p>mRNA-1273 (Moderna) 2 doses 28 d apart 100 mcg per 0.5 ml dose</p> <p>Randomized: 15,210<br/>Dose 1: 15,181<br/>Dose 2: 14,711</p> <p>Safety population (unsolicited AEs): 15,185</p> <p>Withdrawals: 233 (45 discontinued study due to SARS-CoV-2 diagnosis)</p> | <p>Saline placebo 2 doses 28 d apart 0.5 ml dose</p> <p>Randomized: 15,210<br/>Dose 1: 15,170<br/>Dose 2: 14,617</p> <p>Safety population (unsolicited AEs): 15,166</p> <p>Withdrawals: 290 (69 discontinued study due to SARS-CoV-2 diagnosis)</p> | <p>Total randomized: 30,420<br/>Total safety population: 30,351</p> <p>Male 52.6%<br/>Mean age 51.4 y<br/>White 79.2%<br/>18 to &lt;65 y at risk: 16.7%<br/>18 to &lt;65 y not at risk: 58.6%<br/>≥65 y: 24.8%<br/>Significant cardiac disease 4.9%<br/>HIV infection 0.6%</p> <p>Baseline SARS-CoV-2 status:</p> | <p>Solicited local and systemic adverse reactions during 7 d following each injection;</p> <p><b>Unsolicited adverse events (AEs)</b> for 28 d following each injection, including treatment-emergent AE (any event during study not present before exposure to injection or any event already present that worsens after exposure to study vaccine;</p>                                                                                                                                                                                                                                          | <p>Safety analysis included all participants who received at least one injection, according to product received.</p> | <p>From associated publication:</p> <p><b>Myocarditis: 0</b><br/><b>Pericarditis: 2</b> (68 d &amp; 73 d after dose 2) vaccine vs. 2 placebo</p> |

| Trial name;<br>Author (year);<br>Country (number of sites);<br>Dates of enrolment<br>Funding                                                                                                                                       | Eligibility,<br>Randomization &<br>Blinding                                                                                                                                                                                                                                                                                                                                                                          | Study Arms                                                                                                                                                                                                                                                                                                                                                      |                                                                                                                                                                                                                                                                                                    | Baseline Demographics                                                                                                                                                                                                                                                                                                             | Outcome(s);<br>Safety Assessment                                                                                                                                                                                                                                                                                        | Analysis                                                                                                                                                                                      | Results                            |
|------------------------------------------------------------------------------------------------------------------------------------------------------------------------------------------------------------------------------------|----------------------------------------------------------------------------------------------------------------------------------------------------------------------------------------------------------------------------------------------------------------------------------------------------------------------------------------------------------------------------------------------------------------------|-----------------------------------------------------------------------------------------------------------------------------------------------------------------------------------------------------------------------------------------------------------------------------------------------------------------------------------------------------------------|----------------------------------------------------------------------------------------------------------------------------------------------------------------------------------------------------------------------------------------------------------------------------------------------------|-----------------------------------------------------------------------------------------------------------------------------------------------------------------------------------------------------------------------------------------------------------------------------------------------------------------------------------|-------------------------------------------------------------------------------------------------------------------------------------------------------------------------------------------------------------------------------------------------------------------------------------------------------------------------|-----------------------------------------------------------------------------------------------------------------------------------------------------------------------------------------------|------------------------------------|
|                                                                                                                                                                                                                                    |                                                                                                                                                                                                                                                                                                                                                                                                                      | Vaccine arm                                                                                                                                                                                                                                                                                                                                                     | Placebo arm                                                                                                                                                                                                                                                                                        |                                                                                                                                                                                                                                                                                                                                   |                                                                                                                                                                                                                                                                                                                         |                                                                                                                                                                                               |                                    |
|                                                                                                                                                                                                                                    | <p>Randomized 1:1, stratified by age (≥18 to &lt;65 y vs. ≥65 y) and being at risk for severe Covid-19 based on pre-existing risk factors as per CDC; centralized interactive response technology system</p> <p>Study personnel and participants were blinded, but pharmacists and vaccine administrators were unblinded; participants informed of group assignment at end of blinded phase and offered vaccine.</p> |                                                                                                                                                                                                                                                                                                                                                                 |                                                                                                                                                                                                                                                                                                    | <p>Positive: 680 (2.2%), similar between arms;<br/>Missing: 523 (1.7%), similar between arms</p>                                                                                                                                                                                                                                  | <p>AEs leading to discontinuation from a dose and/or study withdrawal, MAAEs and SAEs, throughout study period (1-759 d)</p> <p>MedDRA classification for all solicited adverse reactions and unsolicited AEs</p> <p>Unblinded safety data reviewed by independent data and safety monitoring board</p>                 |                                                                                                                                                                                               |                                    |
| <p><b>C4591001 Trial, Phase 3 -adolescent cohort</b></p> <p>Frenck (2021)</p> <p>Oct 15, 2020 – Jan 12, 2021</p> <p>Argentina (NR), Brazil (NR), Germany (NR), South Africa (NR), Turkey (NR), USA (29)</p> <p>Industry-funded</p> | <p>Included adolescents 12-15 y and adults 16-25 y who were healthy or with stable pre-existing conditions</p> <p>Exclusions: medical history of SARS-CoV-2 infection or Covid-19 diagnosis; treatment with immunosuppressive therapy; diagnosed with immunocompromising condition</p> <p>Randomized 1:1; web-based system</p> <p>Study personnel evaluating safety</p>                                              | <p>BNT 162b2 (Pfizer-BioNTech)<br/>2 doses 21 d apart<br/>30 mcg per 0.3 ml dose</p> <p>Randomized:</p> <p>12-15 y: 1,134<br/>Dose 1: 1,131<br/>Dose 2: 1,124</p> <p>16-25 y: 1,875<br/>Dose 1: 1,869<br/>Dose 2: 1,826</p> <p>Withdrawals:</p> <p>12-15 y<br/>After dose 1: 7<br/>After dose 2: 0</p> <p>16-25 y<br/>After dose 1: 43<br/>After dose 2: 20</p> | <p>Saline placebo<br/>2 doses 21 d apart<br/>0.3 ml per dose</p> <p>Randomized:</p> <p>12-15 y: 1,130<br/>Dose 1: 1,129<br/>Dose 2: 1,117</p> <p>16-25 y: 1,913<br/>Dose 1: 1,906<br/>Dose 2: 1,836</p> <p>Withdrawals:</p> <p>12-15 y<br/>After dose 1: 12<br/>After dose 2: 1</p> <p>16-25 y</p> | <p>Total randomized:<br/>12-15 y: 2,264<br/>16-25 y: 3,788</p> <p>Total safety population:<br/>12-15 y: 2,260<br/>16-25 y: 1,098 (subset with e-diary data)</p> <p>Male 51%<br/>White 86%</p> <p>Baseline SARS-CoV-2:<br/>Positive:<br/>12-15 y: 93 (4.1%), similar between arms<br/>16-25 y: 64 (5.8%), similar between arms</p> | <p>Solicited local and systemic AEs during 7 d following each injection;<br/><b>Unsolicited AEs</b> for 1 mo after dose 1 and SAEs for 6 mos after dose 2.</p> <p>MedDRA v23.1 classification.</p> <p>Unblinded safety data reviewed by independent data and safety monitoring board; ongoing for 2 y after dose 2.</p> | <p>12-15 y: Safety analysis included all participants who received at least one injection.</p> <p>16-25 y: subset of participants who received an e-diary to record reactogenicity events</p> | <p>Myocarditis/pericarditis: 0</p> |

| Trial name;<br>Author (year);<br>Country (number of sites);<br>Dates of enrolment<br>Funding                                                                                                                                           | Eligibility,<br>Randomization &<br>Blinding                                                                                                                                                                                                                                                                                                                                                                  | Study Arms                                                                                                                                                                                                                              |                                                                                                                                                                                                                  | Baseline Demographics                                                                                                                                                                                                                                                                                                                                                                                                  | Outcome(s);<br>Safety Assessment                                                                                                                                                                                                                                                                               | Analysis                                                                                                      | Results                                                 |
|----------------------------------------------------------------------------------------------------------------------------------------------------------------------------------------------------------------------------------------|--------------------------------------------------------------------------------------------------------------------------------------------------------------------------------------------------------------------------------------------------------------------------------------------------------------------------------------------------------------------------------------------------------------|-----------------------------------------------------------------------------------------------------------------------------------------------------------------------------------------------------------------------------------------|------------------------------------------------------------------------------------------------------------------------------------------------------------------------------------------------------------------|------------------------------------------------------------------------------------------------------------------------------------------------------------------------------------------------------------------------------------------------------------------------------------------------------------------------------------------------------------------------------------------------------------------------|----------------------------------------------------------------------------------------------------------------------------------------------------------------------------------------------------------------------------------------------------------------------------------------------------------------|---------------------------------------------------------------------------------------------------------------|---------------------------------------------------------|
|                                                                                                                                                                                                                                        |                                                                                                                                                                                                                                                                                                                                                                                                              | Vaccine arm                                                                                                                                                                                                                             | Placebo arm                                                                                                                                                                                                      |                                                                                                                                                                                                                                                                                                                                                                                                                        |                                                                                                                                                                                                                                                                                                                |                                                                                                               |                                                         |
|                                                                                                                                                                                                                                        | were blinded to group assignments                                                                                                                                                                                                                                                                                                                                                                            |                                                                                                                                                                                                                                         | After dose 1: 70<br>After dose 2: 22                                                                                                                                                                             |                                                                                                                                                                                                                                                                                                                                                                                                                        |                                                                                                                                                                                                                                                                                                                |                                                                                                               |                                                         |
| C4591001 Trial, Phase 2/3<br><br>Polack(2021, primary publication) & Thomas(2021)<br><br>Jul 27, 2020 – October 29, 2020<br><br>Argentina (1), Brazil (2), Germany (6), South Africa (4), Turkey (9), USA (130)<br><br>Industry-funded | Included participants ≥16 y, healthy or with stable pre-existing conditions<br><br>Exclusions: medical history of SARS-CoV-2 infection or Covid-19 diagnosis; treatment with immunosuppressive therapy; diagnosed with immunocompromising condition<br><br>Randomized 1:1; web-based system<br><br>Study personnel evaluating safety were blinded to group assignments; unblinded follow-up started Dec 2020 | BNT162b2 (Pfizer-BioNTech)<br>2 doses 21 d apart<br>30 mcg per 0.3 ml dose<br><br>Randomized: 22,085<br>Dose 1: 22,030<br>Dose 2: 21,759<br><br>Safety population: 21,926<br><br>Withdrawals:<br>After dose 1: 271<br>After dose 2: 167 | Saline placebo<br>2 doses 21 d apart<br>0.3 ml dose<br><br>Randomized: 22,080<br>Dose 1: 22,030<br>Dose 2: 21,650<br><br>Safety population: 21,921<br><br>Withdrawals:<br>After dose 1: 380<br>After dose 2: 273 | Total randomized: 44,165<br><br>Total safety population: 43,847<br><br>Male 50.9%<br>Median age 51.0 y<br>16-55 y 59.4%<br>>55 y 40.6%<br>White 82.0%<br>Congestive heart failure 0.5%<br>Myocardial infarction 1.0%<br>Any malignancy 3.6%<br>Rheumatic disease 0.3%<br>AIDS/HIV 0.5%<br><br>Baseline SARS-CoV-2 status:<br>Positive: 1,405 (3.2%), similar between arms<br>Missing: 277 (0.6%), similar between arms | Solicited local and systemic AEs during 7 d after each injection; <b>Unsolicited AEs</b> and SAEs for 1 mo and 6 mos after dose 2, respectively.<br><br>MedDRA v23.1 classification;<br><br>Unblinded safety data reviewed by independent data and safety monitoring board; ongoing for 2 y after second dose. | Safety analysis included all participants who received at least one injection irrespective of follow-up time. | <b>Myocarditis: 0</b>                                   |
| <b>ENSEMBLE Trial, Phase 3</b><br><br>Sadoff (2021)<br><br>Sep 21, 2020 – Jan 22, 2021<br><br>Argentina, Brazil, Chile, Colombia, Mexico, Peru, South Africa, USA<br><br>Industry-funded                                               | Adults ≥18 y, healthy or with stable pre-existing conditions; excluded those who received chronic/recurrent systemic corticosteroids, or antineoplastic and immunomodulating agents or radiotherapy in prior 6 mo before study vaccine and during study, or are pregnant<br><br>Randomized 1:1, stratified by site, age, and being at risk for severe Covid-19                                               | Ad26.COVID.S (Janssen)<br>1 dose<br>5×10 <sup>10</sup> vp per 0.5 ml dose<br><br>Randomized: 21,895<br><br>Safety population: 21,895<br><br>Withdrawals: 49                                                                             | Saline placebo<br>1 dose x 0.5ml<br><br>Randomized: 21,888<br><br>Safety population: 21,888<br><br>Withdrawals: 96                                                                                               | Total randomized: 44,325<br><br>Total safety population: 43,783<br><br>Male 54.9%<br>Median age 52 y<br>White 58.7%<br>Serious heart condition 2.3%<br>Immunocompromised from blood transplant, immune deficiencies, use of corticosteroids or other immunosuppressing medicines 0.2%<br>Immunocompromised from organ transplant <0.1%<br><br>Baseline SARS-CoV-2 status:                                              | Solicited local and systemic AEs 7 d after injection (for subset of 6,000 participants); <b>Unsolicited SAEs</b> up to 28 d after injection, MAAEs until 6 mos after vaccination, and MAAEs leading to study withdrawal<br><br>Independent data and safety monitoring board reviewed unblinded safety data.    | Safety analysis included all participants who received injection                                              | <b>Pericarditis: 1 (&lt;0.1%) vaccine vs. 0 placebo</b> |

| Trial name;<br>Author (year);<br>Country (number of sites);<br>Dates of enrolment<br>Funding                                                    | Eligibility,<br>Randomization &<br>Blinding                                                                                                                                                                                                                                                                                                                                                                                                                                          | Study Arms                                                                                                                                                                                                                                 |                                                                                                                                                                                                  | Baseline Demographics                                                                                                                                                                                                                                                                                                                                                                                                               | Outcome(s);<br>Safety Assessment                                                                                                                                                             | Analysis                                                                       | Results                                                                                 |
|-------------------------------------------------------------------------------------------------------------------------------------------------|--------------------------------------------------------------------------------------------------------------------------------------------------------------------------------------------------------------------------------------------------------------------------------------------------------------------------------------------------------------------------------------------------------------------------------------------------------------------------------------|--------------------------------------------------------------------------------------------------------------------------------------------------------------------------------------------------------------------------------------------|--------------------------------------------------------------------------------------------------------------------------------------------------------------------------------------------------|-------------------------------------------------------------------------------------------------------------------------------------------------------------------------------------------------------------------------------------------------------------------------------------------------------------------------------------------------------------------------------------------------------------------------------------|----------------------------------------------------------------------------------------------------------------------------------------------------------------------------------------------|--------------------------------------------------------------------------------|-----------------------------------------------------------------------------------------|
|                                                                                                                                                 |                                                                                                                                                                                                                                                                                                                                                                                                                                                                                      | Vaccine arm                                                                                                                                                                                                                                | Placebo arm                                                                                                                                                                                      |                                                                                                                                                                                                                                                                                                                                                                                                                                     |                                                                                                                                                                                              |                                                                                |                                                                                         |
|                                                                                                                                                 | based on pre-existing risk factors; interactive web response system<br><br>Participants and study personnel (including HCW administering vaccine) blinded until either discontinuation or an event                                                                                                                                                                                                                                                                                   |                                                                                                                                                                                                                                            |                                                                                                                                                                                                  | Positive: 4,217 (9.6%), similar between arms<br>Missing: 1,271 (2.9%), similar between arms                                                                                                                                                                                                                                                                                                                                         |                                                                                                                                                                                              |                                                                                |                                                                                         |
| <b>AZD1222 Trial, Phase 3</b><br><br>Falsey (2021)<br><br>Aug 28, 2020 – Jan 15, 2021<br><br>Chile, Peru, USA (88 total)<br><br>Industry-funded | Included adults ≥18 y, with stable pre-existing conditions, at high risk for exposure to SARS-CoV-2 and at increased risk for severe Covid-19<br><br>Exclusions: history of SARS-CoV-2 infection; confirmed or suspected immunodeficiency, or with significant disease; pregnant or breastfeeding<br><br>Randomized 2:1, stratified by age; method NR<br><br>Group assignment unblinded for 7,635 (35.3%) AstraZeneca and 4,157 (38.4%) placebo participants, after the second dose. | AZD1222 (AstraZeneca) 2 doses 4 wks apart<br>5 x 10 <sup>10</sup> vp per dose<br><br>Randomized: 21,635<br>Dose 1: 21,583<br>Dose 2: 20,769<br><br>Safety population: 21,587<br><br>Withdrawals:<br>After dose 1: 283<br>After dose 2: 228 | Saline placebo<br>2 doses 4 wks apart<br><br>Randomized: 10,816<br>Dose 1: 10,769<br>Dose 2: 9951<br><br>Safety population: 10,792<br><br>Withdrawals:<br>After dose 1: 240<br>After dose 2: 258 | Total randomized: 32,451<br><br>Total safety population: 32,379<br><br>Male 55.6%<br>Mean age: 50.2y<br>≥18-64 y 77.6%<br>≥65 y 22.4%<br>White 79.0%<br>Serious heart condition 3.3%<br>Cancer 6.5%<br>Immunocompromised due to solid organ transplantation <0.1%<br>HIV infection 1.6%<br><br>Baseline SARS-CoV-2 status:<br>Positive: 915 (2.8%), similar between arms<br>Missing/not performed: 575 (1.8%), similar between arms | Solicited local and systemic AEs 7 d after each injection;<br><b>Unsolicited AEs</b> up to 28 d after injection, SAEs, MAAEs, and MEs of special interest up to 730 d after informed consent | Safety analysis included all participants who received at least one injection. | Myocarditis/pericarditis: 0                                                             |
| <b>AZD1222 Phase 1/2/3, pooled analysis</b><br><br>Voysey (2021a; primary publication) & Voysey (2021b)<br><br>Apr 23, 2020 – Dec 6, 2020       | Adults ≥18 y, healthy or with stable pre-existing conditions, or at risk of exposure (health and social care setting workers, 58.5%)                                                                                                                                                                                                                                                                                                                                                 | AZD1222 (AstraZeneca) 2 doses 4-12 wks apart<br>2.2-6.5x10 <sup>10</sup> vp per 0.5ml dose, 2<br><br>Randomized: 12,408                                                                                                                    | Meningococcal ACWY vaccine (UK)<br>OR<br>Meningococcal ACWY vaccine (dose 1) + saline placebo (dose 2; Brazil)<br>OR                                                                             | Total randomized: 24,422<br><br>Total safety population: 24,244<br><br>Male 44%<br>Median age NR<br>18-55 y 82.5%                                                                                                                                                                                                                                                                                                                   | Solicited local and systemic AEs for 7 d after each injection observed by investigator or reported by participant;                                                                           | Safety analysis included all participants who received at least one injection. | <b>Pericarditis:</b> 1 vaccine (0 grade 3 severity) vs. 2 (1 grade 3 severity) controls |

| Trial name;<br>Author (year);<br>Country (number of sites);<br>Dates of enrolment<br>Funding | Eligibility,<br>Randomization &<br>Blinding                                                                                                                                                                                                                                                                                                                                       | Study Arms                                                                                         |                                                                                                                                                                                                                        | Baseline Demographics                                                                                                                                                                                                                                                                                                                                             | Outcome(s);<br>Safety Assessment                                                                                                                                                                                                                                                                                                             | Analysis | Results |
|----------------------------------------------------------------------------------------------|-----------------------------------------------------------------------------------------------------------------------------------------------------------------------------------------------------------------------------------------------------------------------------------------------------------------------------------------------------------------------------------|----------------------------------------------------------------------------------------------------|------------------------------------------------------------------------------------------------------------------------------------------------------------------------------------------------------------------------|-------------------------------------------------------------------------------------------------------------------------------------------------------------------------------------------------------------------------------------------------------------------------------------------------------------------------------------------------------------------|----------------------------------------------------------------------------------------------------------------------------------------------------------------------------------------------------------------------------------------------------------------------------------------------------------------------------------------------|----------|---------|
|                                                                                              |                                                                                                                                                                                                                                                                                                                                                                                   | Vaccine arm                                                                                        | Placebo arm                                                                                                                                                                                                            |                                                                                                                                                                                                                                                                                                                                                                   |                                                                                                                                                                                                                                                                                                                                              |          |         |
| Brazil (6), South Africa (8), UK (5+19)<br><br>Industry-funded                               | Exclusions: confirmed or suspected immunosuppressive or immunodeficiency state; current diagnosis of cancer; pregnant or breastfeeding<br><br>Randomized 1:1, stratified by study site and study group; secure web platform<br><br>Single blind (Brazil, UK); double blind (South Africa) - study personnel and participants blinded, but pharmacist preparing vaccines unblinded | Safety population: 12,282 (after exclusion of 52 participants in HIV cohort)<br><br>Withdrawals NR | Saline placebo (South Africa)<br><br>For all: 2 doses 4-12 wks apart<br>0.5 ml dose<br><br>Randomized: 12014<br><br>Safety population: 11,962 (after exclusion of 52 participants in HIV cohort)<br><br>Withdrawals NR | 56-69 y 11.3%<br>70+ y 6.1%<br>White 75.2%<br>Cardiovascular disorder (includes cardiac diseases) 12.3%<br><br>Baseline SARS-CoV-2 status:<br>Positive: 731 (3.0%), similar between arms<br>Missing: 200 (0.8%), similar between arms<br><br>Sensitivity analyses for participants positive for SARS-CoV-2 at baseline and using ITT were similar to main results | <b>Unsolicited AEs</b> through to 28 d after each injection, and SAEs and AEs of special interest throughout study period from last dose to 364 d.<br><br>MedDRA v23.1 classification, severity classified according to FDA toxicity rating scales.<br><br>Independent data monitoring safety board reviewed safety data on an ongoing basis |          |         |

AE: adverse event(s); LTFU: lost to follow-up; MAAE: medically-attended adverse event(s); mcg: microgram(s); mo: month(s); no.: number; NR: not reported; SAE: serious adverse event(s); vp: viral particle(s); wks: weeks; y: year(s)



**Table A5. Risk of bias assessments for randomized controlled trials (question 1)**

| Vaccine (Trial name)                                          | Randomization | Deviations from intended interventions | Missing outcome data | Measurement of the outcome | Selection of the reported result | Overall assessment of risk of bias |
|---------------------------------------------------------------|---------------|----------------------------------------|----------------------|----------------------------|----------------------------------|------------------------------------|
| Moderna (Teen COVE Trial)<br>Ali 2021                         | Low           | Low                                    | Some concerns        | Low                        | Low                              | Some concerns                      |
| Moderna (COVE Trial)<br>Baden 2021 & El-Sahly 2021            | Low           | Low                                    | Low                  | Low                        | Low                              | Low                                |
| Pfizer-BioNTech (Teen C4591001 Trial)<br>Frenck 2021          | Low           | Low                                    | Low                  | Some concerns              | Low                              | Some concerns                      |
| Pfizer-BioNTech (C4591001 Trial)<br>Polack 2021 & Thomas 2021 | Low           | Low                                    | Low                  | Some concerns              | Low                              | Some concerns                      |
| AstraZeneca (AZD1222 Trial)<br>Falsey 2021                    | Low           | Some concerns                          | Some concerns        | Low                        | Low                              | Some concerns                      |
| AstraZeneca (Oxford Vaccine Trial)<br>Voysey 2021a & 2021b    | Low           | Some concerns                          | Some concerns        | Low                        | Low                              | Some concerns                      |
| Janssen (ENSEMBLE Trial)<br>Sadoff 2021                       | Low           | Low                                    | Low                  | Low                        | Low                              | Low                                |

**Appendix 4. Summary of Findings from the Randomized Controlled Trials (question 1)**

| Age category                 | Age, risk status                                                                     | Country (number of sites)                                                                                    | Vaccine (risk interval) | Number of participants in safety analysis | Number of participants with outcome | Conclusion                                                                                                                        | GRADE                 |
|------------------------------|--------------------------------------------------------------------------------------|--------------------------------------------------------------------------------------------------------------|-------------------------|-------------------------------------------|-------------------------------------|-----------------------------------------------------------------------------------------------------------------------------------|-----------------------|
|                              | <b>Myocarditis</b>                                                                   |                                                                                                              |                         |                                           |                                     |                                                                                                                                   |                       |
| 12-17 y                      | 12-17 y                                                                              | USA (26)<br>Ali                                                                                              | Moderna (28 d)          | 3,726                                     | 0                                   | RCTs provided very uncertain evidence about the incidence of myocarditis after receipt of Moderna in youth 12-17 years of age.    | Very low <sup>a</sup> |
| Adolescents and young adults | 12-25 y                                                                              | USA (29)<br>Frenck                                                                                           | Pfizer (21 d)           | 3,357                                     | 0 (assumed, NR)                     | RCTs provided very uncertain evidence about the incidence of myocarditis after receipt of Pfizer in adolescents and young adults. | Very low <sup>a</sup> |
| Adolescents and adults       | ≥16 y                                                                                | Argentina (1),<br>Brazil (2),<br>Germany (6),<br>South Africa (4),<br>Turkey (9), USA (130)<br>Polack/Thomas | Pfizer (21 d)           | 43,847                                    | 0                                   | RCTs provided very uncertain evidence about the incidence of myocarditis after receipt of Pfizer in adolescents and adults.       | Very low <sup>b</sup> |
| Adults                       | ≥18 y, at risk of exposure to SARS-CoV-2 and/or increased risk for severe Covid-19   | USA (99)<br>Baden/E-Sahly                                                                                    | Moderna (28 d)          | 30,351                                    | 0                                   | RCTs provided very uncertain evidence about the incidence of myocarditis after receipt of currently available vaccine by adults   | Very low <sup>b</sup> |
|                              | ≥18 y, at high-risk of exposure to SARS-CoV-2 and increased risk for severe Covid-19 | Chile, Peru, USA (88 altogether)<br>Falsey                                                                   | AstraZeneca (28 d)      | 32,379                                    | 0 (assumed, NR)                     |                                                                                                                                   |                       |
|                              | ≥18 y, 59% at risk of exposure to SARS-CoV-2                                         | Brazil (6), South Africa (8), UK (24)<br>Voysey                                                              | AstraZeneca (4-12 wk)   | 24,244                                    | 0 (assumed, NR)                     |                                                                                                                                   |                       |
|                              | ≥18 y                                                                                | Argentina, Brazil, Chile, Colombia, Mexico, Peru, South Africa, USA (number of sites NR)<br>Sadoff           | Janssen (single dose)   | 43,783                                    | 0 (assumed, NR)                     |                                                                                                                                   |                       |
|                              | <b>Pericarditis</b>                                                                  |                                                                                                              |                         |                                           |                                     |                                                                                                                                   |                       |

| Age category                 | Age, risk status                                                                     | Country (number of sites)                                                                                    | Vaccine (risk interval) | Number of participants in safety analysis | Number of participants with outcome            | Conclusion                                                                                                                         | GRADE                 |
|------------------------------|--------------------------------------------------------------------------------------|--------------------------------------------------------------------------------------------------------------|-------------------------|-------------------------------------------|------------------------------------------------|------------------------------------------------------------------------------------------------------------------------------------|-----------------------|
| 12-17 y                      | 12-17 y                                                                              | USA (26)<br>Ali                                                                                              | Moderna (28 d)          | 3,726                                     | 0                                              | RCTs provided very uncertain evidence about the incidence of pericarditis after receipt of Moderna in youth 12-17 years of age.    | Very low <sup>a</sup> |
| Adolescents and young adults | 12-25 y                                                                              | USA (29)<br>Frenck                                                                                           | Pfizer (21 d)           | 3,357                                     | 0 (assumed, NR)                                | RCTs provided very uncertain evidence about the incidence of pericarditis after receipt of Pfizer in adolescents and young adults. | Very low <sup>a</sup> |
| Adolescents and adults       | ≥16 y                                                                                | Argentina (1),<br>Brazil (2),<br>Germany (6),<br>South Africa (4),<br>Turkey (9), USA (130)<br>Polack/Thomas | Pfizer (21 d)           | 43,847                                    | 0 (assumed, NR)                                | RCTs provided very uncertain evidence about the incidence of pericarditis after receipt of Pfizer in adolescents and adults.       | Very low <sup>b</sup> |
| Adults                       | ≥18 y, at risk of exposure to SARS-CoV-2 and/or increased risk for severe Covid-19   | USA (99)<br>Baden/E-Sahly                                                                                    | Moderna (28 d)          | 30,351                                    | 2 (68 d & 73 d post-second dose) vs. 2 placebo | RCTs provided very uncertain evidence about the incidence of pericarditis after receipt of currently available vaccine by adults   | Very low <sup>b</sup> |
|                              | ≥18 y, at high-risk of exposure to SARS-CoV-2 and increased risk for severe Covid-19 | Chile, Peru, USA (88 altogether)<br>Falsey                                                                   | AstraZeneca (28 d)      | 32,379                                    | 0 (assumed, NR)                                |                                                                                                                                    |                       |
|                              | ≥18 y, 59% at risk of exposure to SARS-CoV-2                                         | Brazil (6), South Africa (8), UK (24)<br>Voysey                                                              | AstraZeneca (4-12 wk)   | 24,244                                    | 1 vs. 2 controls                               |                                                                                                                                    |                       |
|                              | ≥18 y                                                                                | Argentina, Brazil, Chile, Colombia, Mexico, Peru, South Africa, USA (number of sites NR)<br>Sadoff           | Janssen (single dose)   | 43,783                                    | 1 (<0.1%) vs. 0 placebo                        |                                                                                                                                    |                       |

GRADE Explanations:

<sup>a</sup> Rated down for indirectness since results by sex are expected to differ; rated down twice for high imprecision for these very rare events.

<sup>b</sup> Rated down twice for indirectness and for imprecision for these very rare events.
